# Supplementary material for: Catalytic asymmetric construction of tetrasubstituted carbon stereocenters by conjugate addition of dialkyl phosphine oxides to β,β-disubstituted α,β-unsaturated carbonyl compounds
Source: Royal Society of Chemistry journal article supplement (doi:10.1039/c1cc16079f), 2011-12-03

# Catalytic Asymmetric Construction of Tetrasubstituted Carbon Stereocenters by Conjugate Addition of Dialkyl Phosphine Oxides to $\beta,\beta$ -Disubstituted $\alpha,\beta$ -Unsaturated Carbonyl Compounds

*Depeng Zhao, Lijuan Mao, Linqing Wang, Dongxu Yang, and Rui Wang\**

*<sup>a</sup>State Key Laboratory for Oxo Synthesis and Selective Oxidation Lanzhou Institute of Chemical Physics Chinese Academy of Sciences Lanzhou 730000 (P.R. China)*

*<sup>b</sup>Key Laboratory of Preclinical Study for New Drugs of Gansu Province, School of Basic Medical Sciences, State Key Laboratory of Applied Organic Chemistry, and Institute of Biochemistry and Molecular Biology, Lanzhou University, Lanzhou, 730000, P. R. China.*

[wangrui@lzu.edu.cn](mailto:wangrui@lzu.edu.cn)

## Table of Contents:

|                                                                                                                                          |          |
|------------------------------------------------------------------------------------------------------------------------------------------|----------|
| General remarks                                                                                                                          | S2       |
| Materials                                                                                                                                | S2-S4    |
| Typical procedure for the asymmetric hydrophosphinylation of $\beta,\beta$ -Disubstituted $\alpha,\beta$ -unsaturated carbonyl compounds | S4-S15   |
| References                                                                                                                               | S15      |
| Copies of HPLC results                                                                                                                   | S16-S49  |
| Copies of NMR spectra                                                                                                                    | S50-S118 |

### General remarks

All reactions were performed under an argon atmosphere and solvents were dried according to established procedures.  $^1\text{H}$  NMR (300 M),  $^{13}\text{C}$  NMR (75 M) and  $^{31}\text{P}$  NMR (121 M) spectra were obtained in  $\text{CDCl}_3$ . The chemical shifts are reported in ppm relative to internal standard TMS ( $^1\text{H}$  NMR), to residual signals of the solvents ( $\text{CHCl}_3$ , 7.26 ppm for  $^1\text{H}$  NMR and 77.0 ppm for  $^{13}\text{C}$  NMR) and to external standard 85%  $\text{H}_3\text{PO}_4$  ( $^{31}\text{P}$  NMR). The enantiomeric excess was determined by HPLC analysis.

### Materials

Diethylphosphine oxide was commercially available. Other dialkylphosphine oxides were prepared according to literature procedures.<sup>[1][2]</sup> **L2** was prepared according to the previous reported procedures.<sup>[3]</sup>  $\text{Et}_2\text{Zn}$  was freshly prepared<sup>[4]</sup> and diluted to 1.0 M in toluene before use. Pyridine was freshly distilled before use.  $\beta,\beta$ -Disubstituted  $\alpha,\beta$ -unsaturated carbonyl compounds were prepared according to the previous reported procedures.<sup>[5]</sup> New substrates are given below:

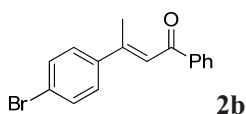

$^1\text{H}$  NMR (300 MHz,  $\text{CDCl}_3$ )  $\delta$  7.91 – 7.79 (m, 2H), 7.54 – 7.43 (m, 1H), 7.43 – 7.31 (m, 4H), 7.12 – 7.03 (m, 2H), 6.75 (d,  $J = 1.4$  Hz, 1H), 2.28 (d,  $J = 1.4$  Hz, 3H).  $^{13}\text{C}$  NMR (75 MHz,  $\text{CDCl}_3$ )  $\delta$  192.4, 151.4, 139.5, 137.9, 132.8, 131.2, 129.0, 128.7, 128.4, 124.4, 122.0, 26.5.

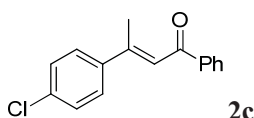

$^1\text{H}$  NMR (300 MHz,  $\text{CDCl}_3$ )  $\delta$  8.07 – 7.91 (m, 2H), 7.61 – 7.43 (m, 5H), 7.38 (d,  $J = 8.4$  Hz, 2H), 7.14 (dd,  $J = 2.4, 1.1$  Hz, 1H), 2.56 (d,  $J = 1.3$  Hz, 3H).  $^{13}\text{C}$  NMR (75 MHz,  $\text{CDCl}_3$ )  $\delta$  191.7, 153.4, 141.0, 139.1, 135.1, 132.7, 128.8, 128.6, 128.2, 127.8, 122.3, 18.7.

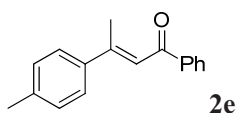

$^1\text{H}$  NMR (300 MHz,  $\text{CDCl}_3$ )  $\delta$  8.06 – 7.94 (m, 2H), 7.59 – 7.42 (m, 5H), 7.27 – 7.19 (m, 2H), 7.19 – 7.14 (m, 1H), 2.59 (d,  $J = 1.3$  Hz, 3H), 2.39 (s, 3H).  $^{13}\text{C}$  NMR (75 MHz,  $\text{CDCl}_3$ )  $\delta$  191.8, 155.2, 139.8, 139.5, 139.3, 132.4, 129.3, 128.5, 128.2, 126.4, 121.2, 21.2, 18.7.

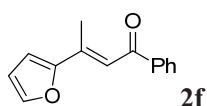

$^1\text{H}$  NMR (300 MHz,  $\text{CDCl}_3$ )  $\delta$  8.17 – 7.83 (m, 2H), 7.64 – 7.37 (m, 5H), 6.75 (d,  $J = 3.4$  Hz, 1H), 6.51 (dd,  $J = 3.4, 1.7$  Hz, 1H), 2.52 (d,  $J = 1.1$  Hz, 3H).  $^{13}\text{C}$  NMR (75 MHz,  $\text{CDCl}_3$ )  $\delta$  191.4, 154.8, 144.1, 141.9, 139.6, 132.3, 128.5, 128.1, 116.5, 112.4, 112.3, 15.66.

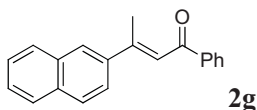

$^1\text{H}$  NMR (300 MHz,  $\text{CDCl}_3$ )  $\delta$  8.03 (dd,  $J = 5.2, 3.1$  Hz, 3H), 7.95 – 7.80 (m, 3H), 7.70 (dd,  $J = 8.6, 1.9$  Hz, 1H), 7.61 – 7.44 (m, 5H), 7.36 – 7.29 (m, 1H), 2.71 (d,  $J = 1.2$  Hz, 3H).  $^{13}\text{C}$  NMR (75 MHz,  $\text{CDCl}_3$ )  $\delta$  191.9, 154.8, 139.9, 139.4, 133.6, 133.2, 132.6, 128.6, 128.5, 128.3, 128.2<sup>7</sup>, 127.62, 126.8, 126.6, 126.2, 124.1, 122.5, 18.9.

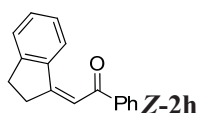

$^1\text{H}$  NMR (300 MHz,  $\text{CDCl}_3$ )  $\delta$  8.03 (dd,  $J = 5.3, 3.3$  Hz, 2H), 7.56 (tt,  $J = 7.6, 1.3$  Hz, 1H), 7.50 – 7.42 (m, 3H), 7.39 – 7.27 (m, 2H), 7.22 (td,  $J = 7.2, 1.3$  Hz, 1H), 6.34 (s, 1H), 4.22 (dd,  $J = 3.3, 1.7$  Hz, 2H), 3.38 (d,  $J = 1.8$  Hz, 2H).  $^{13}\text{C}$  NMR (75 MHz,  $\text{CDCl}_3$ )  $\delta$  197.2, 144.5, 143.9, 137.5, 136.4, 133.1, 131.8, 128.4<sup>9</sup>, 128.4<sup>5</sup>, 126.1, 124.8, 123.7, 119.0, 38.1, 38.0.

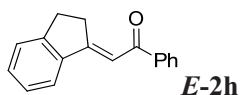

$^1\text{H}$  NMR (300 MHz,  $\text{CDCl}_3$ )  $\delta$  8.09 – 7.98 (m, 2H), 7.77 (d,  $J = 7.7$  Hz, 1H), 7.58 – 7.43 (m, 4H), 7.39 (d,  $J = 3.9$  Hz, 2H), 7.34 – 7.25 (m, 1H), 3.51 – 3.42 (m, 2H), 3.16 – 3.07 (m, 2H).  $^{13}\text{C}$  NMR (75 MHz,  $\text{CDCl}_3$ )  $\delta$  190.7, 164.7, 150.4, 140.4, 139.8, 132.1, 131.3, 128.5, 127.9, 126.8, 125.8, 121.6, 111.3, 32.5, 30.8.

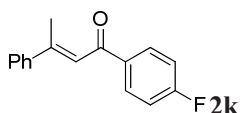

$^1\text{H}$  NMR (300 MHz,  $\text{CDCl}_3$ )  $\delta$  8.09 – 7.96 (m, 2H), 7.63 – 7.50 (m, 2H), 7.47 – 7.34 (m, 3H), 7.20 – 7.07 (m, 3H), 2.59 (s, 3H).  $^{13}\text{C}$  NMR (75 MHz,  $\text{CDCl}_3$ )  $\delta$  190.2, 165.4 (d,  $J = 254.0$  Hz), 155.4, 142.6, 135.7, 130.8 (d,  $J = 9.2$  Hz), 129.2, 128.6, 126.4, 121.6, 115.6 (d,  $J = 21.8$  Hz), 18.9.

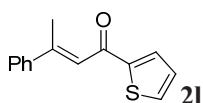

$^1\text{H}$  NMR (300 MHz,  $\text{CDCl}_3$ )  $\delta$  7.76 (dd,  $J = 3.8, 1.1$  Hz, 1H), 7.61 (dd,  $J = 4.9, 1.1$  Hz, 1H), 7.59 – 7.51 (m, 2H), 7.47 –

7.37 (m, 3H), 7.13 (dd,  $J = 4.9, 3.8$  Hz, 1H), 7.08 (d,  $J = 1.3$  Hz, 1H), 2.65 (d,  $J = 1.2$  Hz, 3H).  $^{13}\text{C}$  NMR (75 MHz,  $\text{CDCl}_3$ )  $\delta$  183.5, 155.9, 147.0, 142.7, 133.2, 131.0, 129.2, 128.6, 128.1, 126.5, 121.1, 18.9.

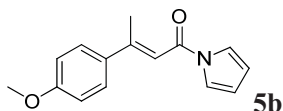

$^1\text{H}$  NMR (300 MHz,  $\text{CDCl}_3$ )  $\delta$  7.51 (d,  $J = 8.9$  Hz, 2H), 7.44 – 7.34 (m, 2H), 6.94 (d,  $J = 8.9$  Hz, 2H), 6.72 (d,  $J = 1.2$  Hz, 1H), 6.38 – 6.17 (m, 2H), 3.85 (s, 3H), 2.60 (d,  $J = 1.1$  Hz, 3H).  $^{13}\text{C}$  NMR (75 MHz,  $\text{CDCl}_3$ )  $\delta$  163.4, 160.8, 157.6, 134.1, 127.8, 119.2, 114.0, 113.9<sup>6</sup>, 112.7, 55.4, 18.7.

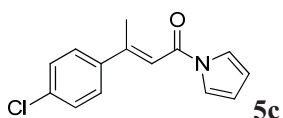

$^1\text{H}$  NMR (300 MHz,  $\text{CDCl}_3$ )  $\delta$  7.50 – 7.42 (m, 2H), 7.42 – 7.34 (m, 4H), 6.72 (d,  $J = 1.3$  Hz, 1H), 6.32 (t,  $J = 3.0$  Hz, 2H), 2.58 (d,  $J = 1.3$  Hz, 3H).  $^{13}\text{C}$  NMR (75 MHz,  $\text{CDCl}_3$ )  $\delta$  163.1, 156.3, 140.3, 135.5, 128.9, 127.7, 119.2, 116.3, 113.1, 18.8.

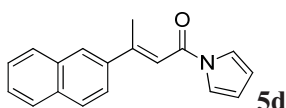

$^1\text{H}$  NMR (300 MHz,  $\text{CDCl}_3$ )  $\delta$  7.88 (d,  $J = 1.5$  Hz, 1H), 7.81 – 7.70 (m, 3H), 7.52 (dd,  $J = 8.6, 1.9$  Hz, 1H), 7.47 – 7.37 (m, 2H), 7.38 – 7.28 (m, 2H), 6.77 (d,  $J = 1.2$  Hz, 1H), 6.29 – 6.16 (m, 2H), 2.61 (d,  $J = 1.1$  Hz, 3H).  $^{13}\text{C}$  NMR (75 MHz,  $\text{CDCl}_3$ )  $\delta$  163.3, 157.6, 139.1, 133.6, 133.0, 128.5, 128.4, 127.6, 127.0, 126.7, 126.1, 123.7, 119.2, 116.2, 112.9, 18.9.

### Typical procedure for the asymmetric hydrophosphinylation of $\beta,\beta$ -Disubstituted $\alpha,\beta$ -unsaturated carbonyl compounds

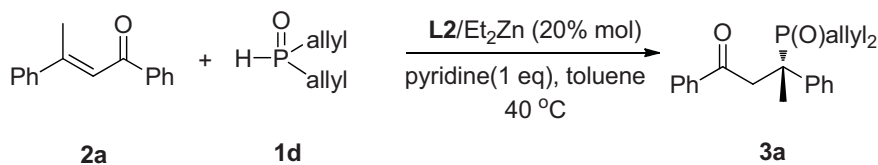

Typical experimental procedure: To a stirred solution of **L2** (33.1 mg, 0.05 mmol) in toluene (0.5 mL) was added diethylzinc (100  $\mu\text{L}$ , 1.0 M in toluene, 0.1 mmol) under an argon atmosphere. The mixture was stirred at room temperature for 0.5 h to generate the zinc catalyst. Then the resulting solution of catalyst was transferred by syringe to a stirred mixture of pyridine (20  $\mu\text{L}$ , 1 eq), **2a** (55.5 mg, 0.25 mmol), and diallyl phosphine oxide **1d** (48.8 mg, 0.375 mmol) in toluene (2.0 mL) at rt under an argon atmosphere. After the addition, the mixture was stirred at 40  $^\circ\text{C}$  for 12 h.

Then the reaction was quenched with saturated  $\text{NH}_4\text{Cl}$  and extracted with  $\text{CH}_2\text{Cl}_2$ . The combined organic layer was dried over  $\text{Na}_2\text{SO}_4$ , and concentrated under vacuum. The crude product was purified by silica gel column chromatography (petroleum ether/ethyl acetate 4:1- ethyl acetate/methanol 40:1).

The racemic products were prepared according to the procedure described above by using racemic **L1**/EtZn.

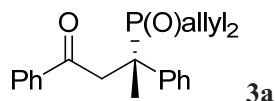

Colorless oil; 94% yield; 99% *ee* determined by HPLC on a Chiralpak AD-H column (hexane/2-propanol = 90/10, flow rate = 1.0 mL/min,  $t_{\text{minor}}$  = 14.5 min,  $t_{\text{major}}$  = 12.9 min);  $[\alpha]_{\text{D}}^{25} = -75.9$  ( $c = 1.19$ ,  $\text{CHCl}_3$ );  $^1\text{H NMR}$  (300 MHz,  $\text{CDCl}_3$ ):  $\delta = 7.90$  (d,  $J = 7.2$  Hz, 2H), 7.59 – 7.38 (m, 5H), 7.33 (t,  $J = 7.6$  Hz, 2H), 7.29 – 7.18 (m, 1H), 6.13 – 5.86 (m, 1H), 5.76 – 5.53 (m, 1H), 5.38 – 4.95 (m, 4H), 4.43 (dd,  $J = 18.0, 8.4$  Hz, 1H), 3.57 (dd,  $J = 17.9, 4.7$  Hz, 1H), 2.89 – 2.58 (m, 2H), 2.28 (dd,  $J = 13.6, 7.5$  Hz, 2H), 1.88 (d,  $J = 16.5$  Hz, 3H) ppm;  $^{13}\text{C NMR}$  (75 MHz,  $\text{CDCl}_3$ ):  $\delta = 196.2$  (d,  $J = 14.1$  Hz), 139.4 (d,  $J = 4.2$  Hz), 137.3 (d,  $J = 2.1$  Hz), 133.1, 128.6 (d,  $J = 8.5$  Hz), 128.5<sup>7</sup>, 128.5<sup>2</sup>, 128.2 (d,  $J = 8.2$  Hz), 127.9, 127.0 (d,  $J = 4.7$  Hz), 126.9 (d,  $J = 2.9$  Hz), 120.4 (d,  $J = 10.8$  Hz), 120.1 (d,  $J = 11.0$  Hz), 43.9 (d,  $J = 56.8$  Hz), 42.5, 31.2 (d,  $J = 58.6$  Hz), 30.8 (d,  $J = 62.1$  Hz), 19.3 ppm;  $^{31}\text{P NMR}$  (121 MHz,  $\text{CDCl}_3$ ):  $\delta = +49.9$  ppm; **IR** (neat): 2925, 1691, 1635, 1447, 1352, 1218, 1160, 998, 919, 848, 755, 695  $\text{cm}^{-1}$ ; **HRMS** (ESI):  $\text{C}_{22}\text{H}_{25}\text{O}_2\text{P}$   $[\text{M}+\text{H}]^+$  calcd: 353.1670, found: 353.1670.

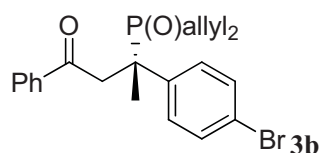

Colorless oil; 98% yield; 96% *ee* determined by HPLC on a Chiralpak As column (hexane/2-propanol = 90/10, flow rate = 1.0 mL/min,  $t_{\text{minor}}$  = 12.1 min,  $t_{\text{major}}$  = 17.4 min);  $[\alpha]_{\text{D}}^{25} = -77.6$  ( $c = 1.07$ ,  $\text{CHCl}_3$ );  $^1\text{H NMR}$  (300 MHz,  $\text{CDCl}_3$ ):  $\delta = 7.89$  (d,  $J = 8.3$  Hz, 2H), 7.55 (t,  $J = 6.8$  Hz, 1H), 7.48 – 7.30 (m, 6H), 6.14 – 5.89 (m, 1H), 5.73 – 5.52 (m, 1H), 5.41 – 4.95 (m, 4H), 4.39 (dd,  $J = 18.1, 8.1$  Hz, 1H), 3.56 (dd,  $J = 18.1, 4.2$  Hz, 1H), 2.87 – 2.61 (m, 2H), 2.26 (dd,  $J = 13.9, 7.3$  Hz, 2H), 1.84 (d,  $J = 16.5$  Hz, 3H) ppm;  $^{13}\text{C NMR}$  (75 MHz,  $\text{CDCl}_3$ ):  $\delta = 195.8$  (d,  $J = 14.0$  Hz), 138.6 (d,  $J = 4.6$  Hz), 137.0 (d,  $J = 1.8$  Hz), 133.2, 131.5 (d,  $J = 2.4$  Hz), 128.7 (d,  $J = 4.6$  Hz), 128.5, 128.3 (d,  $J = 8.5$  Hz), 127.8, 127.7 (d,  $J = 7.0$  Hz), 121.0 (d,  $J = 3.6$  Hz), 120.5 (d,  $J = 11.0$  Hz), 120.3 (d,  $J = 11.1$  Hz), 43.5 (d,  $J = 56.4$  Hz), 42.5, 31.2 (d,  $J = 58.7$  Hz), 30.7 (d,  $J = 62.3$  Hz), 19.2 ppm;  $^{31}\text{P NMR}$  (121 MHz,  $\text{CDCl}_3$ ):  $\delta = +49.2$  ppm; **IR** (neat): 2979, 1690, 1635, 1490, 1350, 1218, 1161, 1003, 919, 854, 754, 692  $\text{cm}^{-1}$ ; **HRMS** (ESI):  $\text{C}_{22}\text{H}_{24}\text{BrO}_2\text{P}$   $[\text{M}+\text{H}]^+$  calcd: 431.0770, found: 431.0782.

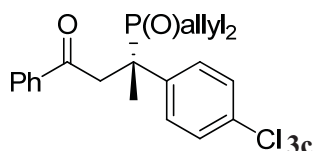

Colorless oil; 94% yield; 98% *ee* determined by HPLC on a Chiralpak As column (hexane/2-propanol = 90/10, flow rate = 1.0 mL/min,  $t_{\text{minor}}$  = 12.5 min,  $t_{\text{major}}$  = 18.3 min);  $[\alpha]_{\text{D}}^{25}$  = -86.0 ( $c$  = 1.07,  $\text{CHCl}_3$ );  $^1\text{H NMR}$  (300 MHz,  $\text{CDCl}_3$ ):  $\delta$  = 7.89 (d,  $J$  = 7.2 Hz, 2H), 7.55 (t,  $J$  = 7.4 Hz, 1H), 7.48 – 7.38 (m, 4H), 7.30 (d,  $J$  = 8.6 Hz, 2H), 6.12 – 5.94 (m, 1H), 5.73 – 5.55 (m, 1H), 5.40 – 4.94 (m, 4H), 4.40 (dd,  $J$  = 18.1, 8.2 Hz, 1H), 3.55 (dd,  $J$  = 18.1, 4.4 Hz, 1H), 2.85 – 2.60 (m, 2H), 2.26 (dd,  $J$  = 13.4, 7.4 Hz, 2H), 1.85 (d,  $J$  = 16.6 Hz, 3H) ppm;  $^{13}\text{C NMR}$  (75 MHz,  $\text{CDCl}_3$ ):  $\delta$  = 195.9 (d,  $J$  = 14.0 Hz), 138.1 (d,  $J$  = 4.5 Hz), 137.0 (d,  $J$  = 2.0 Hz), 133.3, 132.8 (d,  $J$  = 3.6 Hz), 128.6, 128.5, 128.4 (d,  $J$  = 4.5 Hz), 128.3<sup>7</sup> (d,  $J$  = 8.7 Hz), 127.7<sup>9</sup>, 127.7<sup>7</sup> (d,  $J$  = 8.2 Hz), 120.5 (d,  $J$  = 10.9 Hz), 120.3 (d,  $J$  = 11.0 Hz), 43.4 (d,  $J$  = 56.5 Hz), 42.5, 31.2 (d,  $J$  = 58.6 Hz), 30.7 (d,  $J$  = 62.3 Hz), 19.3 ppm;  $^{31}\text{P NMR}$  (121 MHz,  $\text{CDCl}_3$ ):  $\delta$  = +49.3 ppm; **IR** (neat): 2922, 1690, 1635, 1493, 1218, 1161, 998, 919, 755, 692  $\text{cm}^{-1}$ ; **HRMS** (ESI):  $\text{C}_{22}\text{H}_{24}\text{ClO}_2\text{P}$   $[\text{M}+\text{H}]^+$  calcd: 387.1275, found: 387.1281.

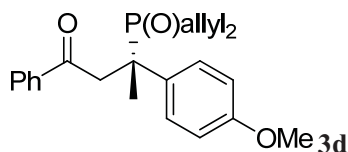

Colorless oil; 97% yield; 98% *ee* determined by HPLC on a Chiralpak As column (hexane/2-propanol = 80/20, flow rate = 1.0 mL/min,  $t_{\text{minor}}$  = 9.7 min,  $t_{\text{major}}$  = 20.3 min);  $[\alpha]_{\text{D}}^{25}$  = -73.0 ( $c$  = 1.28,  $\text{CHCl}_3$ );  $^1\text{H NMR}$  (300 MHz,  $\text{CDCl}_3$ ):  $\delta$  = 7.96 (d,  $J$  = 7.5 Hz, 2H), 7.53 (t,  $J$  = 7.3 Hz, 1H), 7.47 – 7.38 (m, 3H), 7.38 (d,  $J$  = 2.3 Hz, 1H), 6.85 (d,  $J$  = 8.8 Hz, 2H), 6.10 – 5.90 (m, 1H), 5.74 – 5.55 (m, 1H), 5.38 – 5.00 (m, 4H), 4.41 (dd,  $J$  = 18.0, 8.4 Hz, 1H), 3.76 (s, 3H), 3.70 – 3.45 (m, 1H), 2.93 – 2.61 (m, 2H), 2.49 – 2.23 (m, 2H), 1.87 (d,  $J$  = 17.0 Hz, 3H) ppm;  $^{13}\text{C NMR}$  (75 MHz,  $\text{CDCl}_3$ ):  $\delta$  = 196.1 (d,  $J$  = 14.5 Hz), 158.3 (d,  $J$  = 2.9 Hz), 137.2 (d,  $J$  = 1.9 Hz), 133.1, 130.7, 128.5, 128.2 (d,  $J$  = 9.2 Hz), 128.1 (d,  $J$  = 4.7 Hz), 128.0, 127.8 (d,  $J$  = 9.0 Hz), 120.6 (d,  $J$  = 11.0 Hz), 120.3 (d,  $J$  = 10.5 Hz), 113.9 (d,  $J$  = 2.5 Hz), 55.1, 43.1 (d,  $J$  = 58.1 Hz), 42.4, 30.8 (d,  $J$  = 58.0 Hz), 30.4 (d,  $J$  = 61.1 Hz), 19.3 ppm;  $^{31}\text{P NMR}$  (121 MHz,  $\text{CDCl}_3$ ):  $\delta$  = +50.6 ppm; **IR** (neat): 2955, 1691, 1635, 1609, 1513, 1254, 1187, 1032, 920, 854, 755, 691  $\text{cm}^{-1}$ ; **HRMS** (ESI):  $\text{C}_{23}\text{H}_{27}\text{O}_3\text{P}$   $[\text{M}+\text{H}]^+$  calcd: 383.1771, found: 383.1775.

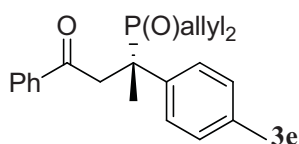

Colorless oil; 94% yield; 96% *ee* determined by HPLC on a Chiralpak As column (hexane/2-propanol = 90/10, flow rate = 1.0 mL/min,  $t_{\text{minor}} = 11.7$  min,  $t_{\text{major}} = 16.3$  min);  $[\alpha]_{\text{D}}^{25} = -66.0$  ( $c = 1.09$ ,  $\text{CHCl}_3$ );  $^1\text{H NMR}$  (300 MHz,  $\text{CDCl}_3$ ):  $\delta = 7.93$  (d,  $J = 7.5$  Hz, 2H), 7.53 (t,  $J = 7.3$  Hz, 1H), 7.41 (t,  $J = 7.5$  Hz, 2H), 7.34 (dd,  $J = 8.4, 2.3$  Hz, 2H), 7.12 (d,  $J = 8.2$  Hz, 2H), 6.09 – 5.89 (m, 1H), 5.78 – 5.58 (m, 1H), 5.33 – 4.98 (m, 4H), 4.40 (dd,  $J = 18.0, 8.4$  Hz, 1H), 3.60 (dd,  $J = 17.7, 4.0$  Hz, 1H), 2.92 – 2.57 (m, 2H), 2.43 – 2.20 (m, 2H), 2.30 (d,  $J = 1.7$  Hz, 3H), 1.87 (d,  $J = 16.7$  Hz, 3H) ppm;  $^{13}\text{C NMR}$  (75 MHz,  $\text{CDCl}_3$ ):  $\delta = 196.1$  (d,  $J = 14.3$  Hz), 137.2 (d,  $J = 2.0$  Hz), 136.4 (d,  $J = 3.2$  Hz), 136.0, 133.0, 129.2 (d,  $J = 2.7$  Hz), 128.5 (d,  $J = 7.3$  Hz), 128.4, 128.1 (d,  $J = 7.7$  Hz), 127.9, 126.8 (d,  $J = 4.7$  Hz), 120.4 (d,  $J = 11.6$  Hz), 120.1 (d,  $J = 11.6$  Hz), 43.5 (d,  $J = 57.3$  Hz), 42.3, 30.9 (d,  $J = 58.2$  Hz), 30.5 (d,  $J = 62.7$  Hz), 20.8, 19.2 ppm;  $^{31}\text{P NMR}$  (121 MHz,  $\text{CDCl}_3$ ):  $\delta = +50.0$  ppm; **IR** (neat): 2978, 1691, 1635, 1514, 1450, 1352, 1218, 1161, 999, 919, 853, 756, 613  $\text{cm}^{-1}$ ; **HRMS** (ESI):  $\text{C}_{23}\text{H}_{27}\text{O}_2\text{P}$   $[\text{M}+\text{H}]^+$  calcd: 367.1821, found: 367.1815.

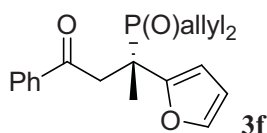

Colorless oil; 93% yield; 98% *ee* determined by HPLC on a Chiralpak AD-H column (hexane/2-propanol = 90/10, flow rate = 1.0 mL/min,  $t_{\text{minor}} = 14.3$  min,  $t_{\text{major}} = 12.2$  min);  $[\alpha]_{\text{D}}^{25} = -39.3$  ( $c = 1.07$ ,  $\text{CHCl}_3$ );  $^1\text{H NMR}$  (300 MHz,  $\text{CDCl}_3$ ):  $\delta = 7.92$  (d,  $J = 7.3$  Hz, 2H), 7.55 (t,  $J = 7.3$  Hz, 1H), 7.43 (t,  $J = 7.5$  Hz, 2H), 7.35 (s, 1H), 6.38 (dd,  $J = 3.3, 1.8$  Hz, 1H), 6.23 (t,  $J = 3.4$  Hz, 1H), 5.95 – 5.67 (m, 2H), 5.31 – 5.10 (m, 4H), 3.97 (dd,  $J = 16.8, 7.1$  Hz, 1H), 3.67 (dd,  $J = 16.8, 5.2$  Hz, 1H), 2.77 – 2.43 (m, 4H), 1.80 (d,  $J = 14.5$  Hz, 3H) ppm;  $^{13}\text{C NMR}$  (75 MHz,  $\text{CDCl}_3$ ):  $\delta = 196.2$  (d,  $J = 13.5$  Hz), 153.4 (d,  $J = 5.5$  Hz), 141.5 (d,  $J = 3.3$  Hz), 137.1 (d,  $J = 1.9$  Hz), 133.1, 128.4, 128.1 (d,  $J = 8.6$  Hz), 127.9, 127.8 (d,  $J = 9.0$  Hz), 120.3 (d,  $J = 11.0$  Hz), 120.2 (d,  $J = 11.0$  Hz), 111.1 (d,  $J = 3.0$  Hz), 107.7 (d,  $J = 7.1$  Hz), 41.5 (d,  $J = 60.0$  Hz), 39.7, 31.5 (d,  $J = 60.1$  Hz), 30.4 (d,  $J = 61.2$  Hz), 17.3 (d,  $J = 2.4$  Hz) ppm;  $^{31}\text{P NMR}$  (121 MHz,  $\text{CDCl}_3$ ):  $\delta = +49.4$  ppm; **IR** (neat): 2916, 1692, 1635, 1450, 1353, 1221, 1160, 998, 932, 757, 693, 603  $\text{cm}^{-1}$ ; **HRMS** (ESI):  $\text{C}_{20}\text{H}_{23}\text{O}_3\text{P}$   $[\text{M}+\text{H}]^+$  calcd: 343.1458, found: 343.1452.

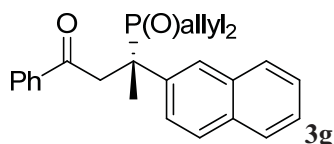

Colorless oil; 94% yield; 96% *ee* determined by HPLC on a Chiralpak AD-H column (hexane/2-propanol = 90/10, flow rate = 1.0 mL/min,  $t_{\text{minor}} = 30.7$  min,  $t_{\text{major}} = 20.6$  min);  $[\alpha]_{\text{D}}^{25} = -85.5$  ( $c = 1.17$ ,  $\text{CHCl}_3$ );  $^1\text{H NMR}$  (300 MHz,  $\text{CDCl}_3$ ):  $\delta = 7.97 - 7.86$  (m, 3H), 7.85 – 7.74 (m, 3H), 7.67 (d,  $J = 8.8$  Hz, 1H), 7.51 (t,  $J = 7.4$  Hz, 1H), 7.48 – 7.33 (m, 4H), 6.13 – 5.90 (m, 1H), 5.77 – 5.57 (m, 1H), 5.37 – 4.91 (m, 4H), 4.55 (dd,  $J = 18.0, 8.4$  Hz, 1H), 3.69 (dd,  $J = 18.0, 4.6$  Hz,

1H), 2.93 – 2.60 (m, 2H), 2.29 (dd,  $J = 13.3, 7.6$  Hz, 2H), 2.00 (d,  $J = 16.5$  Hz, 3H) ppm;  $^{13}\text{C NMR}$  (75 MHz,  $\text{CDCl}_3$ ):  $\delta = 196.0$  (d,  $J = 14.1$  Hz), 137.2 (d,  $J = 2.0$  Hz), 136.9 (d,  $J = 3.8$  Hz), 133.0<sup>9</sup>, 133.0<sup>6</sup> (d,  $J = 4.2$  Hz), 132.0 (d,  $J = 2.1$  Hz), 128.5, 128.4 (d,  $J = 7.1$  Hz), 128.0<sup>7</sup>, 128.0<sup>5</sup>, 127.9 (d,  $J = 7.2$  Hz), 127.8<sup>6</sup>, 127.4 (d,  $J = 1.1$  Hz), 126.0<sup>9</sup> (d,  $J = 1.5$  Hz), 126.0<sup>5</sup> (d,  $J = 4.0$  Hz), 125.9 (d,  $J = 0.8$  Hz), 125.0 (d,  $J = 3.5$  Hz), 120.4 (d,  $J = 10.9$  Hz), 120.1 (d,  $J = 11.0$  Hz), 44.1 (d,  $J = 56.7$  Hz), 42.6, 31.1 (d,  $J = 58.5$  Hz), 30.8 (d,  $J = 62.0$  Hz), 19.4 ppm;  $^{31}\text{P NMR}$  (121 MHz,  $\text{CDCl}_3$ ):  $\delta = +50.0$  ppm; **IR** (neat): 2978, 1691, 1634, 1349, 1218, 1162, 999, 920, 752, 691, 627  $\text{cm}^{-1}$ ; **HRMS** (ESI):  $\text{C}_{26}\text{H}_{27}\text{O}_2\text{P}$   $[\text{M}+\text{H}]^+$  calcd: 403.1821, found: 403.1823.

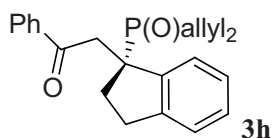

Colorless oil; From *Z* substrate, 72% yield; 96% *ee* determined by HPLC on a Chiralpak AD-H column (hexane/2-propanol = 90/10, flow rate = 1.0 mL/min,  $t_{\text{minor}} = 13.7$  min,  $t_{\text{major}} = 15.3$  min);  $[\alpha]_{\text{D}}^{25} = -27.6$  ( $c = 1.09$ ,  $\text{CHCl}_3$ ); From *E* substrate, 90% yield; 80% *ee*;  $[\alpha]_{\text{D}}^{25} = -23.7$  ( $c = 1.01$ ,  $\text{CHCl}_3$ );  $^1\text{H NMR}$  (300 MHz,  $\text{CDCl}_3$ ):  $\delta = 7.78$  (d,  $J = 7.5$  Hz, 2H), 7.47 – 7.34 (m, 2H), 7.29 (t,  $J = 7.6$  Hz, 2H), 7.16 – 6.97 (m, 3H), 5.95 – 5.73 (m, 1H), 5.67 – 5.47 (m, 1H), 5.27 – 4.83 (m, 4H), 3.95 (dd,  $J = 17.2, 9.8$  Hz, 1H), 3.67 (dd,  $J = 17.2, 6.0$  Hz, 1H), 3.28 – 3.06 (m, 1H), 3.01 – 2.59 (m, 3H), 2.59 – 2.18 (m, 4H) ppm;  $^{13}\text{C NMR}$  (75 MHz,  $\text{CDCl}_3$ ):  $\delta = 197.3$  (d,  $J = 11.7$  Hz), 144.1 (d,  $J = 6.7$  Hz), 141.5 (d,  $J = 3.3$  Hz), 137.1 (d,  $J = 1.3$  Hz), 133.0, 128.3<sup>4</sup> (d,  $J = 6.3$  Hz), 128.2<sup>9</sup>, 127.9, 127.8 (d,  $J = 2.5$  Hz), 127.7 (d,  $J = 7.8$  Hz), 126.7 (d,  $J = 2.5$  Hz), 124.7 (d,  $J = 3.1$  Hz), 124.5 (d,  $J = 2.1$  Hz), 120.2 (d,  $J = 10.9$  Hz), 120.0 (d,  $J = 11.0$  Hz), 52.2 (d,  $J = 61.1$  Hz), 42.1, 31.5 (d,  $J = 58.0$  Hz), 31.3 (d,  $J = 3.2$  Hz), 30.6 (d,  $J = 62.2$  Hz), 30.4 ppm;  $^{31}\text{P NMR}$  (121 MHz,  $\text{CDCl}_3$ ):  $\delta = +50.5$  ppm; **IR** (neat): 2947, 1690, 1635, 1451, 1354, 1216, 1157, 998, 919, 754, 691, 615  $\text{cm}^{-1}$ ; **HRMS** (ESI):  $\text{C}_{23}\text{H}_{25}\text{O}_2\text{P}$   $[\text{M}+\text{H}]^+$  calcd: 365.1665, found: 365.1660.

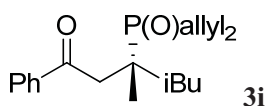

Colorless oil; 90% yield; 93% *ee* determined by HPLC on a Chiralpak AD-H column (hexane/2-propanol = 90/10, flow rate = 1.0 mL/min,  $t_{\text{minor}} = 9.8$  min,  $t_{\text{major}} = 7.3$  min);  $[\alpha]_{\text{D}}^{25} = +1.8$  ( $c = 1.08$ ,  $\text{CHCl}_3$ );  $^1\text{H NMR}$  (300 MHz,  $\text{CDCl}_3$ ):  $\delta = 7.97$  (d,  $J = 7.1$  Hz, 2H), 7.57 (t,  $J = 7.3$  Hz, 1H), 7.46 (t,  $J = 7.4$  Hz, 2H), 6.07 – 5.83 (m, 2H), 5.30 – 5.16 (m, 4H), 3.57 (dd,  $J = 17.4, 10.9$  Hz, 1H), 3.27 (dd,  $J = 17.4, 14.9$  Hz, 1H), 2.96 – 2.64 (m, 4H), 1.99 – 1.82 (m, 2H), 1.79 – 1.62 (m, 1H), 1.43 (d,  $J = 15.9$  Hz, 3H), 0.94 (d,  $J = 6.4$  Hz, 3H), 0.90 (d,  $J = 6.4$  Hz, 3H) ppm;  $^{13}\text{C NMR}$  (75 MHz,  $\text{CDCl}_3$ ):  $\delta = 198.7$  (d,  $J = 7.7$  Hz), 137.5, 133.1, 128.9 (d,  $J = 8.2$  Hz), 128.8<sup>6</sup> (d,  $J = 8.3$  Hz), 128.6, 128.0, 120.0 (d,  $J = 10.9$  Hz,



overlapped), 42.1, 41.6, 40.5 (d,  $J = 60.4$  Hz), 31.8 (d,  $J = 58.6$  Hz), 31.7 (d,  $J = 58.2$  Hz), 25.2, 25.1, 24.3 (d,  $J = 8.1$  Hz), 21.3 ppm;  $^{31}\text{P}$  NMR (121 MHz,  $\text{CDCl}_3$ ):  $\delta = +52.9$  ppm; IR (neat): 2957, 1689, 1635, 1451, 1361, 1218, 1160, 917, 754, 692, 616  $\text{cm}^{-1}$ ; HRMS (ESI):  $\text{C}_{20}\text{H}_{29}\text{O}_2\text{P}$   $[\text{M}+\text{H}]^+$  calcd: 333.1978, found: 333.1970.

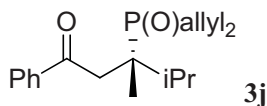

Colorless oil; 92% yield; 90% *ee* determined by HPLC on a Chiralpak AD-H column (hexane/2-propanol = 90/10, flow rate = 1.0 mL/min,  $t_{\text{minor}} = 8.3$  min,  $t_{\text{major}} = 7.7$  min);  $[\alpha]_{\text{D}}^{25} = -0.9$  ( $c = 1.09$ ,  $\text{CHCl}_3$ );  $^1\text{H}$  NMR (300 MHz,  $\text{CDCl}_3$ ):  $\delta = 7.98$  (d,  $J = 7.2$  Hz, 2H), 7.58 (t,  $J = 7.3$  Hz, 1H), 7.47 (t,  $J = 7.5$  Hz, 2H), 6.07 – 5.86 (m, 2H), 5.31 – 5.10 (m, 4H), 3.50 – 3.24 (m, 2H), 3.05 – 2.67 (m, 4H), 2.66 – 2.47 (m, 1H), 1.31 (d,  $J = 15.2$  Hz, 3H), 1.08 (d,  $J = 6.9$  Hz, 3H), 0.98 (d,  $J = 6.8$  Hz, 3H) ppm;  $^{13}\text{C}$  NMR (75 MHz,  $\text{CDCl}_3$ ):  $\delta = 198.9$  (d,  $J = 3.8$  Hz), 137.2, 133.2, 129.3<sup>1</sup> (d,  $J = 8.1$  Hz), 129.2<sup>6</sup> (d,  $J = 8.8$  Hz), 128.6, 128.0, 119.9 (d,  $J = 11.7$  Hz), 119.7 (d,  $J = 11.5$  Hz), 43.5 (d,  $J = 58.8$  Hz), 41.7, 33.7 (d,  $J = 58.7$  Hz), 33.1 (d,  $J = 57.8$  Hz), 30.3, 19.0 (d,  $J = 4.1$  Hz), 18.2 (d,  $J = 6.7$  Hz), 17.9 ppm;  $^{31}\text{P}$  NMR (121 MHz,  $\text{CDCl}_3$ ):  $\delta = +53.8$  ppm; IR (neat): 2970, 1687, 1635, 1450, 1394, 1221, 1157, 998, 916, 747, 692, 615  $\text{cm}^{-1}$ ; HRMS (ESI):  $\text{C}_{19}\text{H}_{27}\text{O}_2\text{P}$   $[\text{M}+\text{H}]^+$  calcd: 319.1821, found: 319.1827.

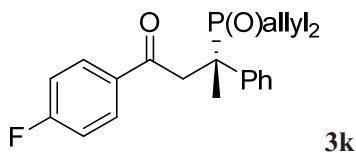

White solid, m.p. 113-115 °C; 91% yield; 98% *ee* determined by HPLC on a Chiralpak As column (hexane/2-propanol = 90/10, flow rate = 1.0 mL/min,  $t_{\text{minor}} = 9.1$  min,  $t_{\text{major}} = 13.5$  min);  $[\alpha]_{\text{D}}^{25} = -71.0$  ( $c = 1.06$ ,  $\text{CHCl}_3$ );  $^1\text{H}$  NMR (300 MHz,  $\text{CDCl}_3$ ):  $\delta = 7.92$  (dd,  $J = 8.9, 5.4$  Hz, 2H), 7.48 (dd,  $J = 7.6, 1.7$  Hz, 2H), 7.34 (t,  $J = 7.7$  Hz, 2H), 7.28 – 7.20 (m, 1H), 7.08 (t,  $J = 8.7$  Hz, 2H), 6.09 – 5.89 (m, 1H), 5.71 – 5.53 (m, 1H), 5.35 – 4.95 (m, 4H), 4.40 (dd,  $J = 17.9, 8.4$  Hz, 1H), 3.53 (dd,  $J = 17.8, 4.6$  Hz, 1H), 2.89 – 2.59 (m, 2H), 2.27 (dd,  $J = 13.7, 7.5$  Hz, 2H), 1.88 (d,  $J = 16.6$  Hz, 3H) ppm;  $^{13}\text{C}$  NMR (75 MHz,  $\text{CDCl}_3$ ):  $\delta = 194.6$  (d,  $J = 14.1$  Hz), 165.6 (d,  $J = 255.0$  Hz), 139.3 (d,  $J = 4.2$  Hz), 133.7 (dd,  $J = 3.0, 2.3$  Hz), 130.5 (d,  $J = 9.3$  Hz), 128.5<sup>2</sup> (d,  $J = 8.7$  Hz), 128.4<sup>7</sup> (d,  $J = 2.5$  Hz), 128.1 (d,  $J = 8.2$  Hz), 126.8<sup>9</sup> (d,  $J = 4.7$  Hz), 126.8<sup>8</sup> (d,  $J = 2.7$  Hz), 120.4 (d,  $J = 10.8$  Hz), 120.1 (d,  $J = 11.0$  Hz), 115.5 (d,  $J = 21.8$  Hz), 43.8 (d,  $J = 56.7$  Hz), 42.4, 31.2 (d,  $J = 58.6$  Hz), 30.7 (d,  $J = 62.2$  Hz), 19.2 ppm;  $^{31}\text{P}$  NMR (121 MHz,  $\text{CDCl}_3$ ):  $\delta = +49.8$  ppm;  $^{19}\text{F}$  NMR (282 MHz,  $\text{CDCl}_3$ ):  $\delta = -105.0$  ppm; IR (neat): 2923, 1692, 1597, 1504, 1415, 1220, 1159, 999, 921, 837, 700, 614  $\text{cm}^{-1}$ ; HRMS (ESI):  $\text{C}_{22}\text{H}_{24}\text{FO}_2\text{P}$   $[\text{M}+\text{H}]^+$  calcd: 371.1571, found: 371.1580.

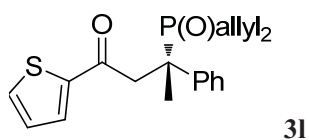

Colorless oil; 97% yield; 98% *ee* determined by HPLC on a Chiralpak OJ-H column (hexane/2-propanol = 90/10, flow rate = 1.0 mL/min,  $t_{\text{minor}} = 15.9$  min,  $t_{\text{major}} = 10.3$  min);  $[\alpha]_{\text{D}}^{25} = -42.9$  ( $c = 1.12$ ,  $\text{CHCl}_3$ );  $^1\text{H NMR}$  (300 MHz,  $\text{CDCl}_3$ ):  $\delta = 7.79$  (s, 1H), 7.58 (d,  $J = 4.3$  Hz, 1H), 7.50 (d,  $J = 7.7$  Hz, 2H), 7.33 (t,  $J = 7.5$  Hz, 2H), 7.28 – 7.19 (m, 1H), 7.08 (dd,  $J = 4.7, 4.0$  Hz, 1H), 6.08 – 5.87 (m, 1H), 5.71 – 5.51 (m, 1H), 5.37 – 4.92 (m, 4H), 4.33 (dd,  $J = 17.3, 8.3$  Hz, 1H), 3.53 (dd,  $J = 17.3, 4.7$  Hz, 1H), 2.90 – 2.58 (m, 2H), 2.29 (dd,  $J = 13.5, 7.5$  Hz, 2H), 1.88 (d,  $J = 16.7$  Hz, 3H) ppm;  $^{13}\text{C NMR}$  (75 MHz,  $\text{CDCl}_3$ ):  $\delta = 189.2$  (d,  $J = 14.6$  Hz), 144.7 (d,  $J = 2.7$  Hz), 138.9 (d,  $J = 4.0$  Hz), 133.8, 132.2, 128.4 (d,  $J = 2.5$  Hz), 128.3 (d,  $J = 8.5$  Hz), 128.1, 127.8 (d,  $J = 8.1$  Hz), 127.0<sup>1</sup> (d,  $J = 4.6$  Hz), 126.9<sup>6</sup> (d,  $J = 2.5$  Hz), 120.5 (d,  $J = 11.0$  Hz), 120.2 (d,  $J = 11.0$  Hz), 43.9 (d,  $J = 56.8$  Hz), 43.0, 31.0 (d,  $J = 58.6$  Hz), 30.6 (d,  $J = 62.4$  Hz), 19.3 ppm;  $^{31}\text{P NMR}$  (121 MHz,  $\text{CDCl}_3$ ):  $\delta = +50.3$  ppm; **IR** (neat): 2980, 1666, 1517, 1416, 1228, 1160, 1060, 917, 847, 729, 700  $\text{cm}^{-1}$ ; **MS** (ESI):  $\text{C}_{18}\text{H}_{25}\text{O}_3\text{P}$   $[\text{M}+\text{H}]^+$  calcd: 359.1, found: 359.3.

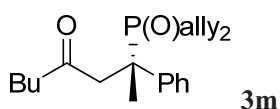

Colorless oil; 98% yield; 99% *ee* determined by HPLC on a Chiralpak As column (hexane/2-propanol = 95/5, flow rate = 1.0 mL/min,  $t_{\text{minor}} = 9.2$  min,  $t_{\text{major}} = 10.3$  min);  $[\alpha]_{\text{D}}^{25} = -5.3$  ( $c = 1.14$ ,  $\text{CHCl}_3$ );  $^1\text{H NMR}$  (300 MHz,  $\text{CDCl}_3$ ):  $\delta = 7.48$  (d,  $J = 7.8$  Hz, 2H), 7.36 (t,  $J = 7.6$  Hz, 2H), 7.31 – 7.21 (m, 1H), 6.04 – 5.83 (m, 1H), 5.64 – 5.47 (m, 1H), 5.35 – 4.91 (m, 4H), 3.78 (dd,  $J = 16.8, 8.4$  Hz, 1H), 2.91 (dd,  $J = 16.8, 4.8$  Hz, 1H), 2.81 – 2.55 (m, 2H), 2.35 – 2.07 (m, 4H), 1.76 (d,  $J = 16.7$  Hz, 3H), 1.45 – 1.31 (m, 2H), 1.14 (dq,  $J = 14.3, 7.3$  Hz, 2H), 0.80 (t,  $J = 7.3$  Hz, 3H) ppm;  $^{13}\text{C NMR}$  (75 MHz,  $\text{CDCl}_3$ ):  $\delta = 207.6$  (d,  $J = 13.4$  Hz), 139.1 (d,  $J = 4.2$  Hz), 128.5 (d,  $J = 2.5$  Hz), 128.4 (d,  $J = 8.7$  Hz), 127.9 (d,  $J = 8.2$  Hz), 127.0 (d,  $J = 3.1$  Hz), 126.9<sup>9</sup> (d,  $J = 4.5$  Hz), 120.3 (d,  $J = 10.8$  Hz), 120.0 (d,  $J = 11.0$  Hz), 46.7 (d,  $J = 1.2$  Hz), 44.1 (d,  $J = 1.4$  Hz), 43.5 (d,  $J = 56.7$  Hz), 31.2 (d,  $J = 58.5$  Hz), 30.8 (d,  $J = 62.0$  Hz), 25.4, 22.0, 19.0, 13.7 ppm;  $^{31}\text{P NMR}$  (121 MHz,  $\text{CDCl}_3$ ):  $\delta = +49.4$  ppm; **IR** (neat): 2957, 1716, 1635, 1419, 1378, 1163, 917, 847, 701, 617  $\text{cm}^{-1}$ ; **HRMS** (ESI):  $\text{C}_{20}\text{H}_{29}\text{O}_2\text{P}$   $[\text{M}+\text{H}]^+$  calcd: 333.1978, found: 333.1968.

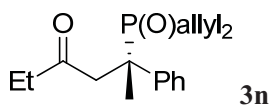

Colorless oil; 84% yield; >99% *ee* determined by HPLC on a Chiralpak As column (hexane/2-propanol = 90/10, flow rate = 1.0 mL/min,  $t_{\text{minor}} = 9.2$  min,  $t_{\text{major}} = 11.9$  min);  $[\alpha]_{\text{D}}^{25} = +0.9$  ( $c = 1.10$ ,  $\text{CHCl}_3$ );  $^1\text{H NMR}$  (300 MHz,  $\text{CDCl}_3$ ):  $\delta =$

7.49 (d,  $J = 7.7$  Hz, 2H), 7.36 (t,  $J = 7.6$  Hz, 2H), 7.31 – 7.22 (m, 1H), 6.03 – 5.85 (m, 1H), 5.67 – 5.46 (m, 1H), 5.33 – 4.91 (m, 4H), 3.77 (dd,  $J = 16.7, 8.5$  Hz, 1H), 2.92 (dd,  $J = 16.7, 4.9$  Hz, 1H), 2.68 (pd,  $J = 14.6, 7.5$  Hz, 2H), 2.41 – 2.04 (m, 2H), 2.20 (dd,  $J = 13.8, 7.2$  Hz, 2H), 1.76 (d,  $J = 16.6$  Hz, 3H), 0.87 (t,  $J = 7.3$  Hz, 3H) ppm;  $^{13}\text{C}$  NMR (75 MHz,  $\text{CDCl}_3$ ):  $\delta = 207.9$  (d,  $J = 13.4$  Hz), 139.2 (d,  $J = 4.2$  Hz), 128.5 (d,  $J = 2.3$  Hz), 128.4 (d,  $J = 8.0$  Hz), 128.0 (d,  $J = 8.2$  Hz), 127.0<sup>3</sup> (d,  $J = 3.3$  Hz), 127.0<sup>2</sup> (d,  $J = 4.4$  Hz), 120.3 (d,  $J = 10.8$  Hz), 119.9 (d,  $J = 11.0$  Hz), 46.6 (d,  $J = 1.2$  Hz), 43.6 (d,  $J = 56.8$  Hz), 37.6 (d,  $J = 1.5$  Hz), 31.2 (d,  $J = 58.5$  Hz), 30.9 (d,  $J = 61.9$  Hz), 19.1, 7.4 ppm;  $^{31}\text{P}$  NMR (121 MHz,  $\text{CDCl}_3$ ):  $\delta = +49.2$  ppm; IR (neat): 2978, 1717, 1635, 1419, 1163, 918, 847, 701, 617  $\text{cm}^{-1}$ ; HRMS (ESI):  $\text{C}_{18}\text{H}_{25}\text{O}_2\text{P}$   $[\text{M}+\text{H}]^+$  calcd: 305.1665, found: 305.1670.

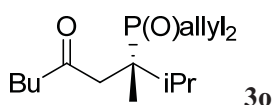

Colorless oil; 87% yield; 96% *ee* determined by HPLC on a Chiralpak AD-H column (hexane/2-propanol = 95/5, flow rate = 1.0 mL/min,  $t_{\text{minor}} = 9.4$  min,  $t_{\text{major}} = 8.8$  min);  $[\alpha]_{\text{D}}^{25} = +1.4$  ( $c = 1.46$ ,  $\text{CHCl}_3$ );  $^1\text{H}$  NMR (300 MHz,  $\text{CDCl}_3$ ):  $\delta = 6.07 - 5.81$  (m, 2H), 5.29 – 5.11 (m, 4H), 2.99 – 2.62 (m, 6H), 2.47 (t,  $J = 7.4$  Hz, 2H), 2.46 – 2.30 (m, 1H), 1.62 – 1.48 (m, 2H), 1.31 (dd,  $J = 15.1, 7.4$  Hz, 2H), 1.21 (d,  $J = 15.4$  Hz, 3H), 1.00 (t,  $J = 7.1$  Hz, 6H), 0.91 (t,  $J = 7.3$  Hz, 3H) ppm;  $^{13}\text{C}$  NMR (75 MHz,  $\text{CDCl}_3$ ):  $\delta = 210.0$  (d,  $J = 4.1$  Hz), 129.2<sup>3</sup> (d,  $J = 8.1$  Hz), 129.1<sup>8</sup> (d,  $J = 8.7$  Hz), 119.6 (d,  $J = 11.0$  Hz), 119.5 (d,  $J = 11.1$  Hz), 45.3, 43.5, 43.1 (d,  $J = 58.9$  Hz), 33.5 (d,  $J = 58.3$  Hz), 32.9 (d,  $J = 57.4$  Hz), 30.4, 25.6, 22.1, 18.7 (d,  $J = 4.6$  Hz), 18.2 (d,  $J = 6.3$  Hz), 17.6, 13.7 ppm;  $^{31}\text{P}$  NMR (121 MHz,  $\text{CDCl}_3$ ):  $\delta = +53.1$  ppm; IR (neat): 2960, 1713, 1635, 1463, 1378, 1159, 914, 612  $\text{cm}^{-1}$ ; HRMS (ESI):  $\text{C}_{17}\text{H}_{31}\text{O}_2\text{P}$   $[\text{M}+\text{H}]^+$  calcd: 299.2134, found: 299.2139.

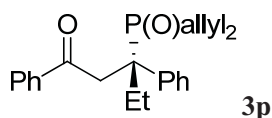

Colorless oil; 84% yield; 94% *ee* determined by HPLC on a Chiralpak OJ-H column (hexane/2-propanol = 95/5, flow rate = 1.0 mL/min,  $t_{\text{minor}} = 12.8$  min,  $t_{\text{major}} = 9.4$  min);  $[\alpha]_{\text{D}}^{25} = -58.9$  ( $c = 1.00$ ,  $\text{CHCl}_3$ );  $^1\text{H}$  NMR (300 MHz,  $\text{CDCl}_3$ ):  $\delta = 8.01$  (d,  $J = 7.3$  Hz, 2H), 7.57 (t,  $J = 7.3$  Hz, 1H), 7.51 – 7.39 (m, 4H), 7.34 (t,  $J = 7.6$  Hz, 2H), 7.30 – 7.18 (m, 1H), 6.06 – 5.80 (m, 1H), 5.79 – 5.60 (m, 1H), 5.31 – 4.97 (m, 4H), 4.11 (dd,  $J = 18.7, 8.9$  Hz, 1H), 3.97 (dd,  $J = 18.7, 11.2$  Hz, 1H), 2.91 (td,  $J = 15.4, 6.9$  Hz, 1H), 2.72 – 2.48 (m, 3H), 2.47 – 2.18 (m, 2H), 1.05 (t,  $J = 7.4$  Hz, 3H) ppm;  $^{13}\text{C}$  NMR (75 MHz,  $\text{CDCl}_3$ ):  $\delta = 196.6$  (d,  $J = 10.3$  Hz), 139.6 (d,  $J = 2.8$  Hz), 136.9 (d,  $J = 1.0$  Hz), 133.1, 128.7<sup>1</sup> (d,  $J = 8.0$  Hz), 128.6<sup>8</sup> (d,  $J = 8.6$  Hz), 128.5, 128.3 (d,  $J = 2.7$  Hz), 127.8, 127.3 (d,  $J = 4.6$  Hz), 126.8 (d,  $J = 3.1$  Hz), 120.0 (d,  $J = 11.2$  Hz), 119.6 (d,  $J = 11.0$  Hz), 48.2 (d,  $J = 55.0$  Hz), 38.4, 32.0 (d,  $J = 60.6$  Hz), 31.5 (d,  $J = 59.6$  Hz), 25.3, 9.8 (d,

$J = 5.3$  Hz) ppm;  $^{31}\text{P}$  NMR (121 MHz,  $\text{CDCl}_3$ ):  $\delta = +50.7$  ppm; IR (neat): 2973, 1691, 1635, 1448, 1216, 1159, 918, 754, 696, 613  $\text{cm}^{-1}$ ; HRMS (ESI):  $\text{C}_{23}\text{H}_{27}\text{NO}_2\text{P}$   $[\text{M}+\text{H}]^+$  calcd: 367.1821, found: 367.1820.

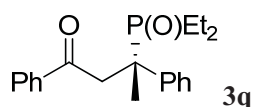

White solid, m.p. 159-161 °C; 82% yield; 99% *ee* determined by HPLC on a Chiralpak OJ-H column (hexane/2-propanol = 90/10, flow rate = 1.0 mL/min,  $t_{\text{minor}} = 11.0$  min,  $t_{\text{major}} = 6.9$  min);  $[\alpha]_{\text{D}}^{25} = -82.6$  ( $c = 1.11$ ,  $\text{CHCl}_3$ );  $^1\text{H}$  NMR (300 MHz,  $\text{CDCl}_3$ ):  $\delta = 7.91$  (d,  $J = 7.5$  Hz, 2H), 7.58 – 7.37 (m, 5H), 7.35 – 7.25 (m, 2H), 7.25 – 7.11 (m, 1H), 4.43 (dd,  $J = 17.8, 7.9$  Hz, 1H), 3.46 (dd,  $J = 17.8, 4.6$  Hz, 1H), 2.04 – 1.78 (m, 1H), 1.83 (d,  $J = 15.7$  Hz, 3H), 1.78 – 1.60 (m, 1H), 1.53 – 1.34 (m, 2H), 1.24 (dt,  $J = 15.3, 7.7$  Hz, 3H), 0.84 (dt,  $J = 15.4, 7.7$  Hz, 3H) ppm;  $^{13}\text{C}$  NMR (75 MHz,  $\text{CDCl}_3$ ):  $\delta = 196.5$  (d,  $J = 13.8$  Hz), 139.8 (d,  $J = 4.2$  Hz), 137.4 (d,  $J = 1.8$  Hz), 133.0, 128.4, 128.3 (d,  $J = 2.5$  Hz), 127.9, 126.9 (d,  $J = 4.4$  Hz), 126.5 (d,  $J = 2.7$  Hz), 42.8 (d,  $J = 58.0$  Hz), 42.2, 19.3, 17.8 (d,  $J = 61.5$  Hz), 16.8 (d,  $J = 65.3$  Hz), 6.5 (d,  $J = 5.5$  Hz), 6.1 (d,  $J = 5.4$  Hz) ppm;  $^{31}\text{P}$  NMR (121 MHz,  $\text{CDCl}_3$ ):  $\delta = +56.3$  ppm; IR (neat): 2977, 2940, 1691, 1449, 1351, 1217, 1156, 1030, 1000, 754, 696, 618  $\text{cm}^{-1}$ ; HRMS (ESI):  $\text{C}_{20}\text{H}_{25}\text{O}_2\text{P}$   $[\text{M}+\text{H}]^+$  calcd: 329.1665, found: 329.1655.

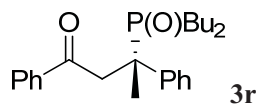

White solid, m.p. 108-110 °C; 90% yield; 99% *ee* determined by HPLC on a Chiralpak AD-H column (hexane/2-propanol = 90/10, flow rate = 1.0 mL/min,  $t_{\text{minor}} = 10.6$  min,  $t_{\text{major}} = 8.1$  min);  $[\alpha]_{\text{D}}^{25} = -86.5$  ( $c = 1.04$ ,  $\text{CHCl}_3$ );  $^1\text{H}$  NMR (300 MHz,  $\text{CDCl}_3$ ):  $\delta = 7.92$  (d,  $J = 7.4$  Hz, 2H), 7.53 (t,  $J = 7.3$  Hz, 1H), 7.49 – 7.36 (m, 4H), 7.35 – 7.25 (m, 2H), 7.25 – 7.15 (m, 1H), 4.44 (dd,  $J = 17.8, 7.9$  Hz, 1H), 3.45 (dd,  $J = 17.8, 4.5$  Hz, 1H), 1.97 – 1.75 (m, 1H), 1.82 (d,  $J = 15.8$  Hz, 3H), 1.74 – 1.58 (m, 2H), 1.56 – 1.32 (m, 5H), 1.28 – 1.11 (m, 3H), 1.09 – 0.88 (m, 1H), 0.95 (t,  $J = 7.2$  Hz, 3H), 0.75 (t,  $J = 7.0$  Hz, 3H) ppm;  $^{13}\text{C}$  NMR (75 MHz,  $\text{CDCl}_3$ ):  $\delta = 196.6$  (d,  $J = 14.0$  Hz), 139.9 (d,  $J = 3.9$  Hz), 137.5 (d,  $J = 1.8$  Hz), 133.1, 128.5, 128.4 (d,  $J = 2.5$  Hz), 128.0, 127.0 (d,  $J = 4.4$  Hz), 126.6 (d,  $J = 2.4$  Hz), 43.0 (d,  $J = 57.8$  Hz), 42.3, 25.3 (d,  $J = 60.2$  Hz), 24.7 (d,  $J = 13.7$  Hz), 24.3<sup>8</sup> (d,  $J = 13.7$  Hz), 24.3<sup>7</sup> (d,  $J = 4.6$  Hz), 24.1 (d,  $J = 65.2$  Hz), 24.0 (d,  $J = 4.4$  Hz), 19.4, 13.7, 13.5 ppm;  $^{31}\text{P}$  NMR (121 MHz,  $\text{CDCl}_3$ ):  $\delta = +54.3$  ppm; IR (neat): 2958, 1692, 1449, 1350, 1218, 1159, 999, 754, 696  $\text{cm}^{-1}$ ; HRMS (ESI):  $\text{C}_{24}\text{H}_{33}\text{O}_2\text{P}$   $[\text{M}+\text{H}]^+$  calcd: 385.2291, found: 385.2286.

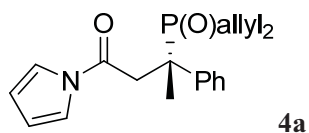

Colorless oil; 88% yield; 99% *ee* determined by HPLC on a Chiralpak OJ-H column (hexane/2-propanol = 90/10, flow rate = 1.0 mL/min,  $t_{\text{minor}} = 11.0$  min,  $t_{\text{major}} = 7.6$  min);  $[\alpha]_{\text{D}}^{25} = -57.5$  ( $c = 1.04$ ,  $\text{CHCl}_3$ );  $^1\text{H NMR}$  (300 MHz,  $\text{CDCl}_3$ ):  $\delta = 7.50$  (d,  $J = 7.7$  Hz, 2H), 7.37 (t,  $J = 7.6$  Hz, 2H), 7.32 – 7.23 (m, 3H), 6.25 (t,  $J = 2.1$  Hz, 2H), 6.08 – 5.90 (m, 1H), 5.71 – 5.52 (m, 1H), 5.41 – 4.97 (m, 4H), 4.20 (dd,  $J = 17.5, 8.1$  Hz, 1H), 3.44 (dd,  $J = 17.5, 4.5$  Hz, 1H), 2.85 – 2.59 (m, 2H), 2.25 (dd,  $J = 13.5, 7.4$  Hz, 2H), 1.90 (d,  $J = 16.4$  Hz, 3H) ppm;  $^{13}\text{C NMR}$  (75 MHz,  $\text{CDCl}_3$ ):  $\delta = 166.6$  (d,  $J = 17.0$  Hz), 138.8 (d,  $J = 4.3$  Hz), 128.7 (d,  $J = 2.5$  Hz), 128.4 (d,  $J = 8.5$  Hz), 127.9 (d,  $J = 8.2$  Hz), 127.2 (d,  $J = 2.8$  Hz), 126.9 (d,  $J = 4.5$  Hz), 120.6 (d,  $J = 10.9$  Hz), 120.3 (d,  $J = 11.1$  Hz), 119.0, 113.1, 43.7 (d,  $J = 56.8$  Hz), 39.2, 31.3 (d,  $J = 58.8$  Hz), 30.9 (d,  $J = 62.7$  Hz), 19.2 ppm;  $^{31}\text{P NMR}$  (121 MHz,  $\text{CDCl}_3$ ):  $\delta = +49.6$  ppm; **IR** (neat): 2980, 1724, 1635, 1469, 1363, 1270, 1160, 918, 844, 744, 617  $\text{cm}^{-1}$ ; **HRMS** (ESI):  $\text{C}_{20}\text{H}_{24}\text{NO}_2\text{P}$   $[\text{M}+\text{H}]^+$  calcd: 342.1617, found: 342.1610.

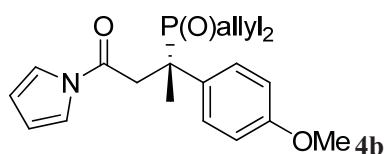

Colorless oil; 91% yield; 96% *ee* determined by HPLC on a Chiralpak As column (hexane/2-propanol = 90/10, flow rate = 1.0 mL/min,  $t_{\text{minor}} = 14.3$  min,  $t_{\text{major}} = 27.8$  min);  $[\alpha]_{\text{D}}^{25} = -71.8$  ( $c = 1.02$ ,  $\text{CHCl}_3$ );  $^1\text{H NMR}$  (300 MHz,  $\text{CDCl}_3$ ):  $\delta = 7.41$  (dd,  $J = 8.8, 2.1$  Hz, 2H), 7.27 (s, 2H), 6.90 (d,  $J = 8.8$  Hz, 2H), 6.26 (t,  $J = 2.1$  Hz, 2H), 6.11 – 5.90 (m, 1H), 5.74 – 5.55 (m, 1H), 5.41 – 4.99 (m, 4H), 4.14 (dd,  $J = 17.4, 8.2$  Hz, 1H), 3.79 (s, 3H), 3.41 (dd,  $J = 17.4, 4.4$  Hz, 1H), 2.86 – 2.57 (m, 2H), 2.25 (dd,  $J = 13.6, 7.5$  Hz, 2H), 1.87 (d,  $J = 16.5$  Hz, 3H) ppm;  $^{13}\text{C NMR}$  (75 MHz,  $\text{CDCl}_3$ ):  $\delta = 166.7$  (d,  $J = 17.2$  Hz), 158.5 (d,  $J = 2.7$  Hz), 130.6 (d,  $J = 4.5$  Hz), 128.5 (d,  $J = 8.4$  Hz), 128.1 (d,  $J = 4.6$  Hz), 128.0 (d,  $J = 7.1$  Hz), 120.5 (d,  $J = 10.8$  Hz), 120.2 (d,  $J = 11.0$  Hz), 119.0, 114.0 (d,  $J = 2.4$  Hz), 113.1, 55.1, 43.1 (d,  $J = 58.0$  Hz), 39.1, 31.3 (d,  $J = 58.0$  Hz), 30.9 (d,  $J = 62.9$  Hz), 19.3 ppm;  $^{31}\text{P NMR}$  (121 MHz,  $\text{CDCl}_3$ ):  $\delta = +50.0$  ppm; **IR** (neat): 2932, 1723, 1610, 1513, 1468, 1269, 1256, 920, 850, 738, 615  $\text{cm}^{-1}$ ; **HRMS** (ESI):  $\text{C}_{21}\text{H}_{26}\text{NO}_3\text{P}$   $[\text{M}+\text{H}]^+$  calcd: 372.1723, found: 372.1731.

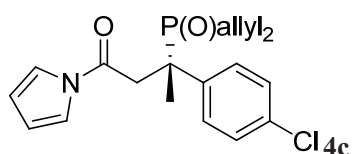

Colorless oil; 96% yield; 94% *ee* determined by HPLC on a Chiralpak AD-H column (hexane/2-propanol = 90/10, flow

rate = 1.0 mL/min,  $t_{\text{minor}} = 14.6$  min,  $t_{\text{major}} = 15.6$  min);  $[\alpha]_{\text{D}}^{25} = -63.4$  ( $c = 1.10$ ,  $\text{CHCl}_3$ );  $^1\text{H NMR}$  (300 MHz,  $\text{CDCl}_3$ ):  $\delta = 7.45$  (dd,  $J = 8.8, 2.1$  Hz, 2H), 7.34 (d,  $J = 8.6$  Hz, 2H), 7.25 (t,  $J = 2.3$  Hz, 2H), 6.26 (t,  $J = 2.4$  Hz, 2H), 6.10 – 5.92 (m, 1H), 5.71 – 5.53 (m, 1H), 5.40 – 4.96 (m, 4H), 4.16 (dd,  $J = 17.6, 8.0$  Hz, 1H), 3.42 (dd,  $J = 17.6, 4.3$  Hz, 1H), 2.84 – 2.66 (m, 2H), 2.30 – 2.15 (m, 2H), 1.86 (d,  $J = 16.4$  Hz, 3H) ppm;  $^{13}\text{C NMR}$  (75 MHz,  $\text{CDCl}_3$ ):  $\delta = 166.4$  (d,  $J = 16.8$  Hz), 137.5 (d,  $J = 4.5$  Hz), 133.2 (d,  $J = 3.4$  Hz), 128.7 (d,  $J = 2.5$  Hz), 128.4 (d,  $J = 4.5$  Hz), 128.2 (d,  $J = 8.5$  Hz), 127.5 (d,  $J = 8.3$  Hz), 120.7 (d,  $J = 10.9$  Hz), 120.5 (d,  $J = 11.1$  Hz), 118.9, 113.3, 43.4 (d,  $J = 56.5$  Hz), 39.2, 31.3 (d,  $J = 58.8$  Hz), 30.9 (d,  $J = 62.8$  Hz), 19.1 ppm;  $^{31}\text{P NMR}$  (121 MHz,  $\text{CDCl}_3$ ):  $\delta = +49.1$  ppm; **IR** (neat): 2981, 1723, 1635, 1469, 1361, 1272, 1162, 1121, 921, 851, 741  $\text{cm}^{-1}$ ; **HRMS** (ESI):  $\text{C}_{20}\text{H}_{23}\text{ClNO}_2\text{P}$   $[\text{M}+\text{H}]^+$  calcd: 376.1228, found: 376.1235.

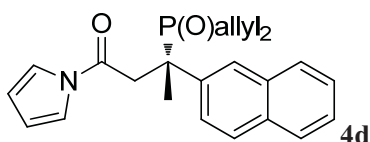

Colorless oil; 93% yield; 94% *ee* determined by HPLC on a Chiralpak AD-H column (hexane/2-propanol = 90/10, flow rate = 1.0 mL/min,  $t_{\text{minor}} = 21.2$  min,  $t_{\text{major}} = 15.9$  min);  $[\alpha]_{\text{D}}^{25} = -81.0$  ( $c = 1.12$ ,  $\text{CHCl}_3$ );  $^1\text{H NMR}$  (300 MHz,  $\text{CDCl}_3$ ):  $\delta = 7.91$  (s, 1H), 7.88 – 7.77 (m, 3H), 7.68 (d,  $J = 8.7$  Hz, 1H), 7.54 – 7.41 (m, 2H), 7.30 (s, 2H), 6.25 (t,  $J = 2.4$  Hz, 2H), 6.12 – 5.92 (m, 1H), 5.72 – 5.55 (m, 1H), 5.39 – 4.90 (m, 4H), 4.33 (dd,  $J = 17.6, 8.1$  Hz, 1H), 3.57 (dd,  $J = 17.6, 4.4$  Hz, 1H), 2.93 – 2.60 (m, 2H), 2.26 (dd,  $J = 13.7, 7.5$  Hz, 2H), 2.02 (d,  $J = 16.4$  Hz, 3H) ppm;  $^{13}\text{C NMR}$  (75 MHz,  $\text{CDCl}_3$ ):  $\delta = 166.5$  (d,  $J = 17.1$  Hz), 136.3 (d,  $J = 4.9$  Hz), 133.1 (d,  $J = 2.6$  Hz), 132.2 (d,  $J = 2.1$  Hz), 128.4 (d,  $J = 2.0$  Hz), 128.1<sup>9</sup> (d,  $J = 8.3$  Hz), 128.1<sup>7</sup>, 127.7 (d,  $J = 8.6$  Hz), 127.5 (d,  $J = 1.1$  Hz), 126.3, 126.2, 126.1<sup>6</sup> (d,  $J = 4.5$  Hz), 124.8 (d,  $J = 3.4$  Hz), 120.8 (d,  $J = 11.0$  Hz), 120.5 (d,  $J = 10.9$  Hz), 119.0, 113.2, 44.0 (d,  $J = 56.7$  Hz), 39.3, 31.2 (d,  $J = 58.7$  Hz), 30.9 (d,  $J = 62.7$  Hz), 19.3 ppm;  $^{31}\text{P NMR}$  (121 MHz,  $\text{CDCl}_3$ ):  $\delta = +50.3$  ppm; **IR** (neat): 2980, 1723, 1634, 1468, 1363, 1272, 1162, 1121, 919, 736, 610  $\text{cm}^{-1}$ ; **HRMS** (ESI):  $\text{C}_{24}\text{H}_{26}\text{NO}_2\text{P}$   $[\text{M}+\text{H}]^+$  calcd: 392.1774, found: 392.1763.

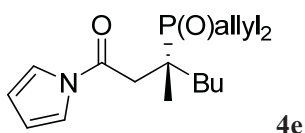

Colorless oil; 90% yield; 98% *ee* determined by HPLC on a Chiralpak AD-H column (hexane/2-propanol = 90/10, flow rate = 1.0 mL/min,  $t_{\text{minor}} = 7.9$  min,  $t_{\text{major}} = 6.7$  min);  $[\alpha]_{\text{D}}^{25} = +5.8$  ( $c = 1.03$ ,  $\text{CHCl}_3$ ); From *Z* substrate, 95% yield; -97% *ee*;  $[\alpha]_{\text{D}}^{25} = -6.4$  ( $c = 1.09$ ,  $\text{CHCl}_3$ );  $^1\text{H NMR}$  (300 MHz,  $\text{CDCl}_3$ ):  $\delta = 7.36$  (s, 2H), 6.29 (t,  $J = 2.4$  Hz, 2H), 6.04 – 5.85 (m, 2H), 5.34 – 5.16 (m, 4H), 3.32 (dd,  $J = 16.3, 9.5$  Hz, 1H), 3.08 (dd,  $J = 16.3, 12.4$  Hz, 1H), 2.91 – 2.61 (m, 4H),

1.97 – 1.70 (m, 2H), 1.54 – 1.22 (m, 4H), 1.37 (d,  $J = 15.6$  Hz, 3H), 0.89 (t,  $J = 7.1$  Hz, 3H) ppm;  $^{13}\text{C}$  NMR (75 MHz,  $\text{CDCl}_3$ ):  $\delta = 168.1$  (d,  $J = 11.2$  Hz), 128.5 (d,  $J = 8.6$  Hz), 128.4 (d,  $J = 8.5$  Hz), 120.2<sup>8</sup> (d,  $J = 11.0$  Hz), 120.2<sup>5</sup> (d,  $J = 10.9$  Hz), 119.2, 113.3, 39.8 (d,  $J = 60.7$  Hz), 37.0, 34.5, 31.8 (d,  $J = 58.9$  Hz), 31.5 (d,  $J = 58.8$  Hz), 26.2 (d,  $J = 5.7$  Hz), 23.2, 20.7, 13.8 ppm;  $^{31}\text{P}$  NMR (121 MHz,  $\text{CDCl}_3$ ):  $\delta = +52.1$  ppm; IR (neat): 2958, 1715, 1635, 1469, 1272, 1163, 1117, 1071, 921, 846, 745, 618  $\text{cm}^{-1}$ ; HRMS (ESI):  $\text{C}_{18}\text{H}_{28}\text{NO}_2\text{P}$   $[\text{M}+\text{H}]^+$  calcd: 322.1930, found: 322.1937.

## References

- [1] Hays, H. R. *J. Org. Chem.* **1968**, *33*, 3690.
- [2] Aksnes, G.; Majewski, P. *Phosphorous and Sulfur*, **1986**, *26*, 261.
- [3] Zhao, D.; Mao, L.; Yang, D.; Wang, R. *J. Org. Chem.* **2010**, *75*, 6756.
- [4] Noller, C. R. *Org. Synth.* **1943**, *Coll. Vol. 2*, 184.
- [5] (a) Tanaka, Y.; Kanai, M.; Shibasaki, M. *J. Am. Chem. Soc.* **2010**, *132*, 8862. (b) Lu, S.-M.; Bolm, C. *Chem. Eur. J.* **2008**, *14*, 7513. (c) Tsuchiya, Y.; Hamashima, Y.; Sodeoka, M. *Org. Lett.* **2006**, *8*, 4851.

## HPLC results

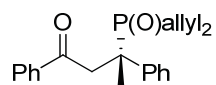

**3a**

HPLC using an AD-H (*n*-Hexane/*i*PrOH=90/10, flow rate 1.0 mL/min)

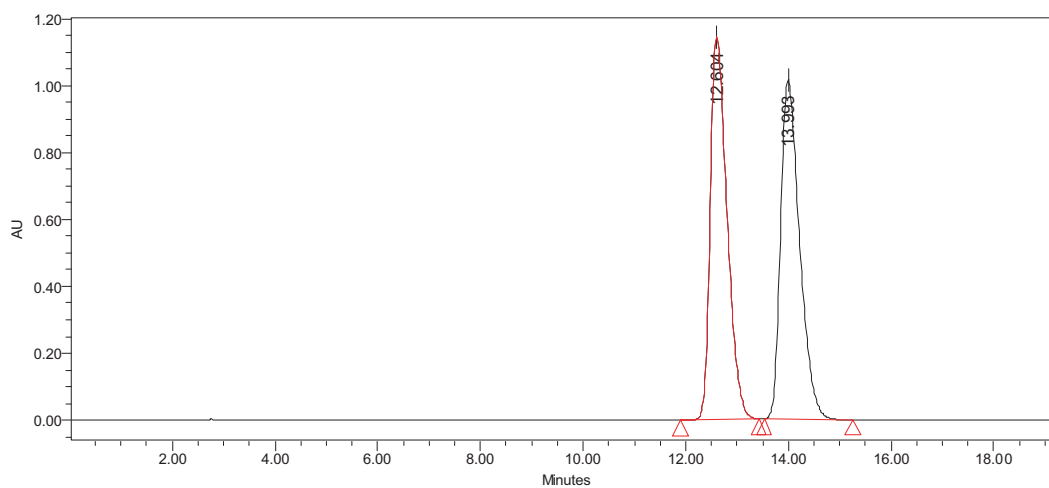

| Name | Retention Time | Area     | % Area | Height  |
|------|----------------|----------|--------|---------|
| 1    | 12.604         | 26021791 | 49.99  | 1143854 |
| 2    | 13.993         | 26028727 | 50.01  | 1015798 |

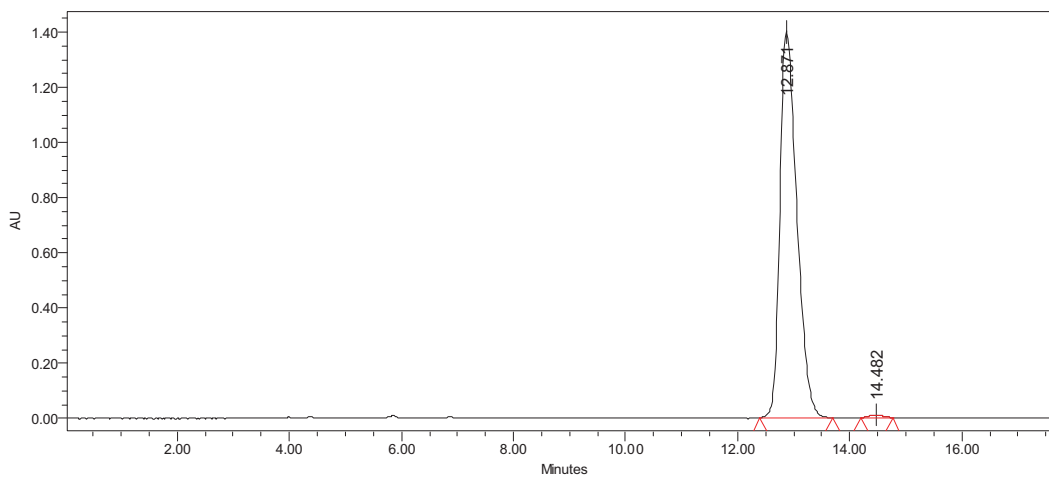

| Name | Retention Time | Area     | % Area | Height  |
|------|----------------|----------|--------|---------|
| 1    | 12.871         | 29491205 | 99.36  | 1401036 |
| 2    | 14.482         | 189248   | 0.64   | 10200   |



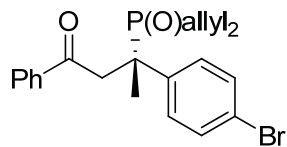

**3b**

HPLC using an As (*n*-Hexane/*i*PrOH=90/10, flow rate 1.0 mL/min)

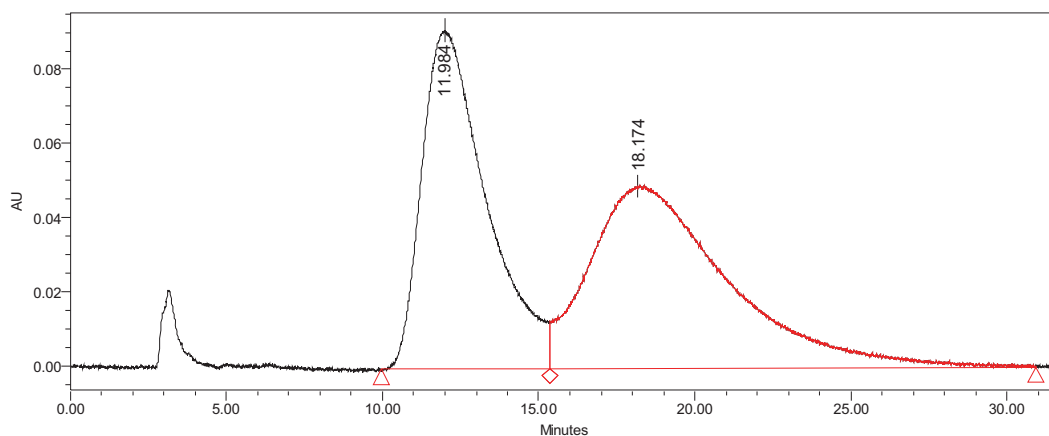

| Name | Retention Time | Area     | % Area | Height |
|------|----------------|----------|--------|--------|
| 1    | 11.984         | 13074669 | 46.50  | 91251  |
| 2    | 18.174         | 15040359 | 53.50  | 49114  |

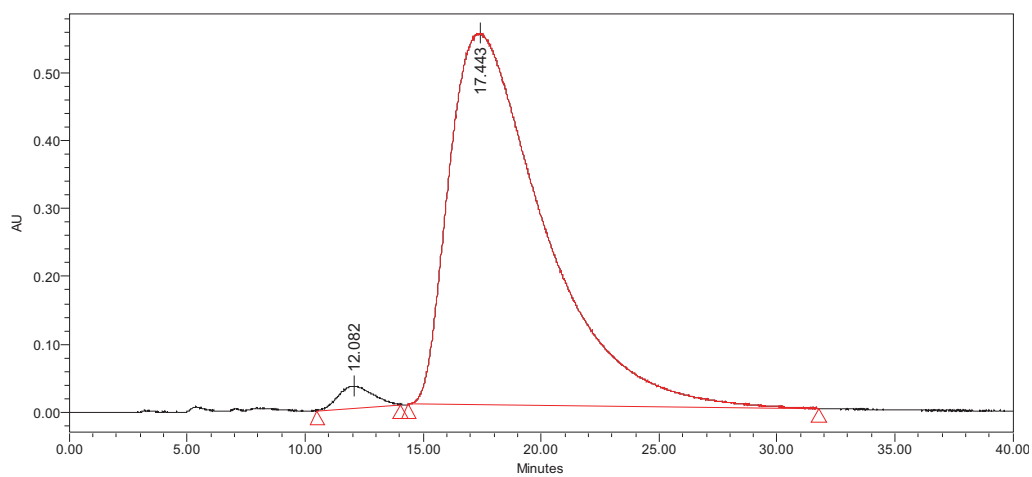

| Name | Retention Time | Area      | % Area | Height |
|------|----------------|-----------|--------|--------|
| 1    | 12.082         | 3278198   | 2.09   | 32531  |
| 2    | 17.443         | 153504631 | 97.91  | 548075 |

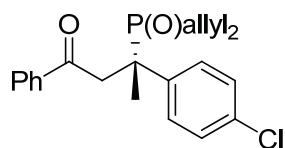

**3c**

HPLC using an AS (*n*-Hexane/*i*PrOH=90/10, flow rate 1.0 mL/min)

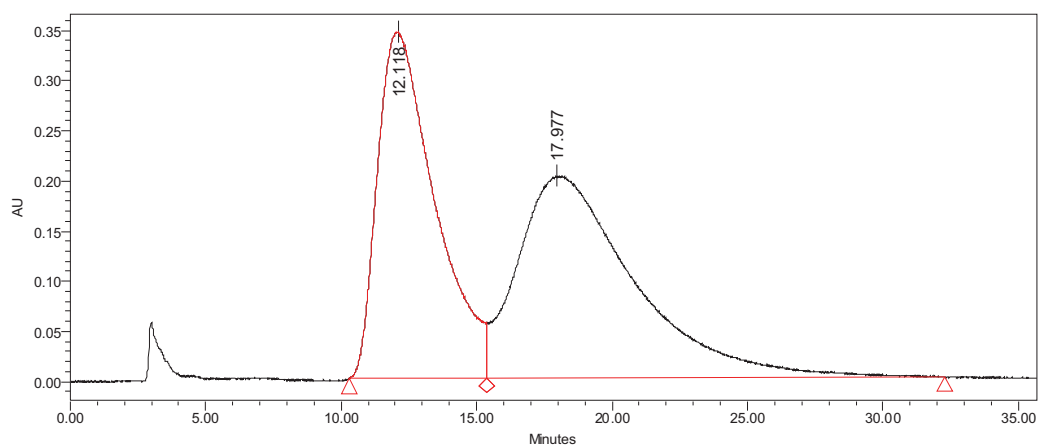

| Name | Retention Time | Area     | % Area | Height |
|------|----------------|----------|--------|--------|
| 1    | 12.118         | 51061177 | 45.97  | 345969 |
| 2    | 17.977         | 60015705 | 54.03  | 201624 |

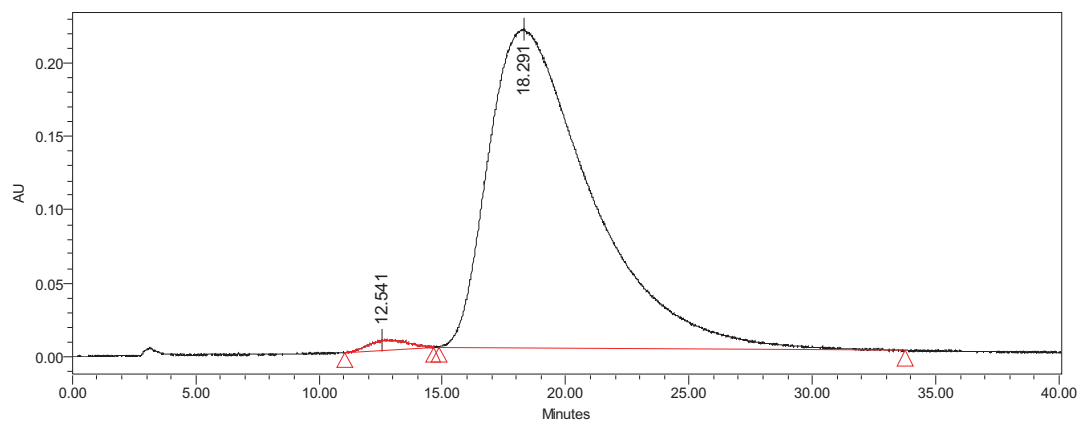

| Name | Retention Time | Area     | % Area | Height |
|------|----------------|----------|--------|--------|
| 1    | 12.541         | 712322   | 1.12   | 6874   |
| 2    | 18.291         | 62920285 | 98.88  | 217679 |

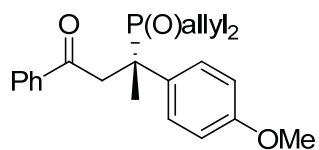

### 3d

HPLC using an AS (*n*-Hexane/*i*PrOH=80/20, flow rate 1.0 mL/min)

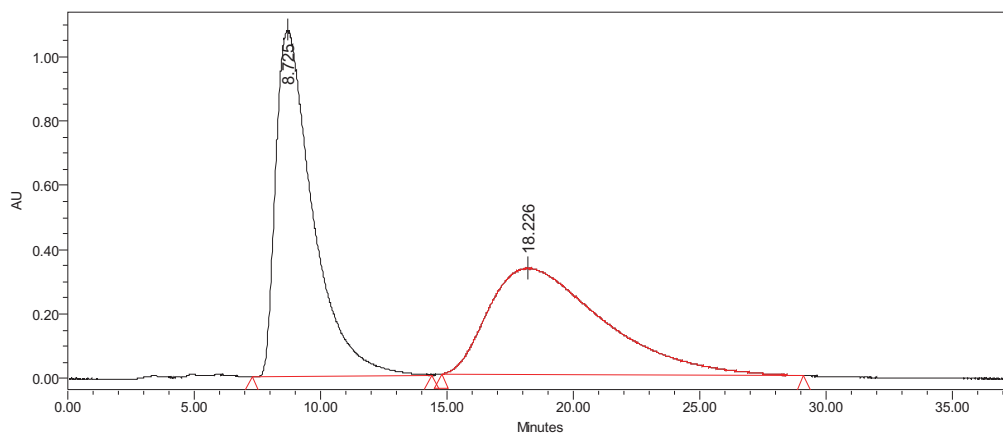

| Name | Retention Time | Area      | % Area | Height  |
|------|----------------|-----------|--------|---------|
| 1    | 8.725          | 109285754 | 51.20  | 1076204 |
| 2    | 18.226         | 104173139 | 48.80  | 330616  |

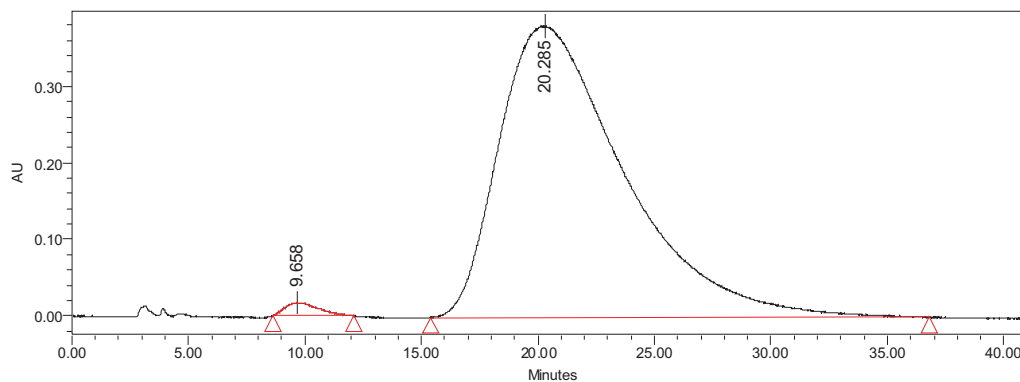

| Name | Retention Time | Area      | % Area | Height |
|------|----------------|-----------|--------|--------|
| 1    | 9.658          | 1699976   | 1.18   | 17277  |
| 2    | 20.285         | 142266606 | 98.82  | 381393 |

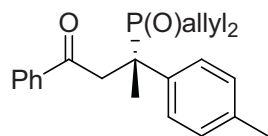

**3e**

HPLC using an AS (*n*-Hexane/*i*PrOH=90/10, flow rate 1.0 mL/min)

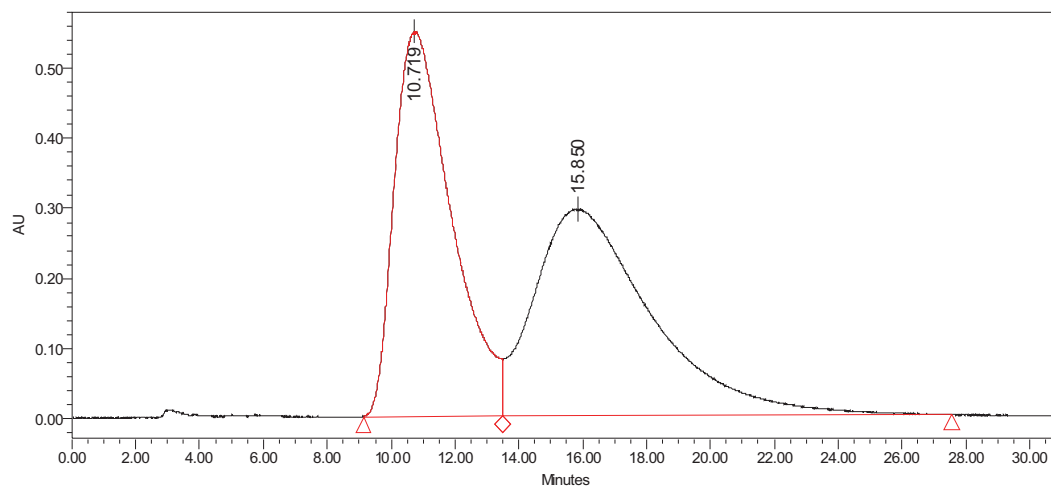

| Name | Retention Time | Area     | % Area | Height |
|------|----------------|----------|--------|--------|
| 1    | 10.719         | 68967113 | 47.72  | 550608 |
| 2    | 15.850         | 75566915 | 52.28  | 295827 |

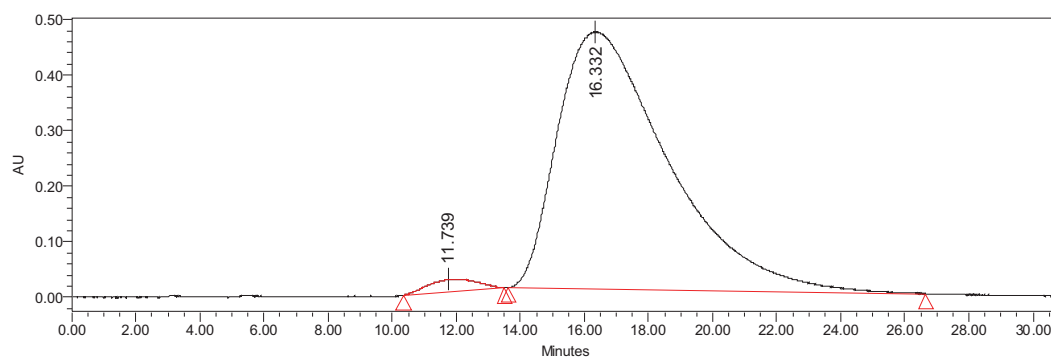

| Name | Retention Time | Area      | % Area | Height |
|------|----------------|-----------|--------|--------|
| 1    | 11.739         | 2347983   | 2.08   | 22572  |
| 2    | 16.332         | 110793648 | 97.92  | 463180 |

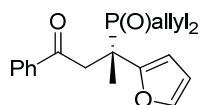

**3f**

HPLC using an AD-H (*n*-Hexane/*i*PrOH=90/10, flow rate 1.0 mL/min)

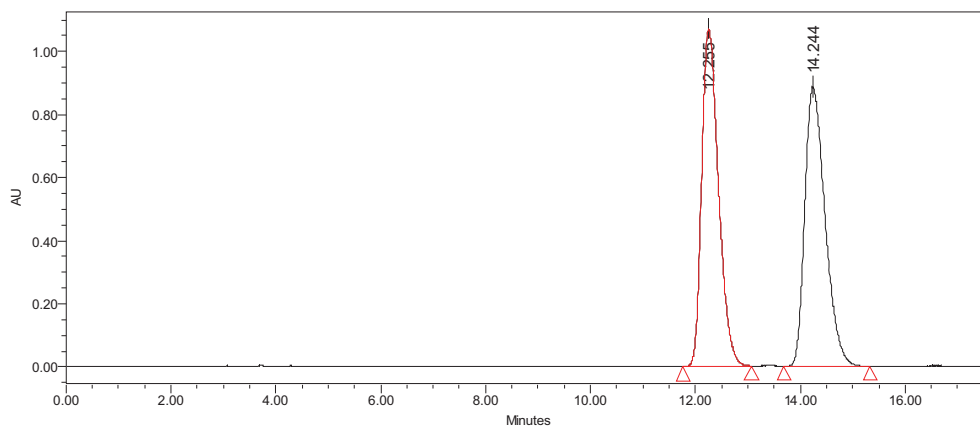

| Name | Retention Time | Area     | % Area | Height  |
|------|----------------|----------|--------|---------|
| 1    | 12.255         | 23736844 | 49.95  | 1070205 |
| 2    | 14.244         | 23785498 | 50.05  | 886362  |

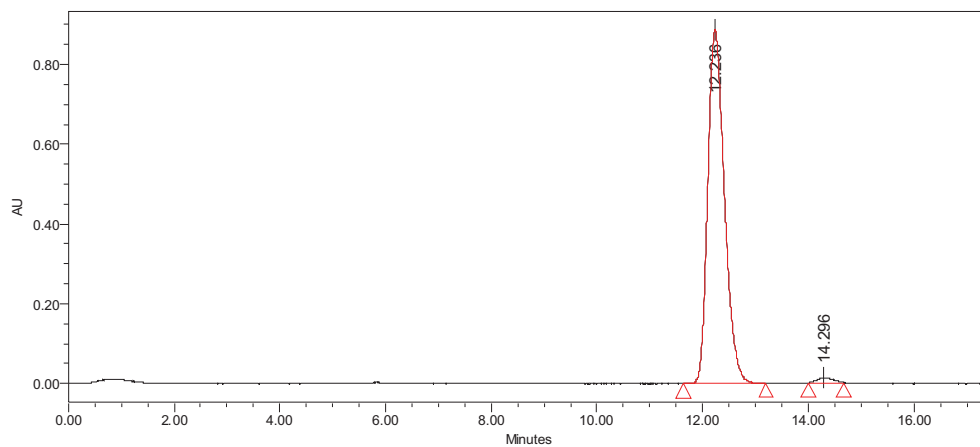

| Name | Retention Time | Area     | % Area | Height |
|------|----------------|----------|--------|--------|
| 1    | 12.236         | 19356854 | 98.75  | 888682 |
| 2    | 14.296         | 245481   | 1.25   | 11726  |

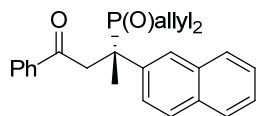

**3g**

HPLC using an AD-H (*n*-Hexane/*i*PrOH=90/10, flow rate 1.0 mL/min)

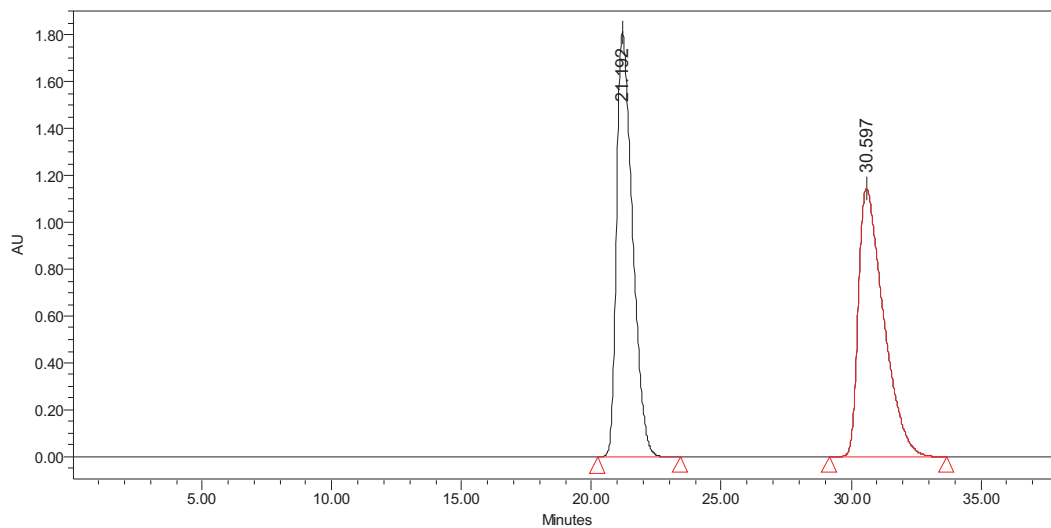

| Name | Retention Time | Area     | % Area | Height  |
|------|----------------|----------|--------|---------|
| 1    | 21.192         | 77426809 | 50.16  | 1810261 |
| 2    | 30.597         | 76934418 | 49.84  | 1142390 |

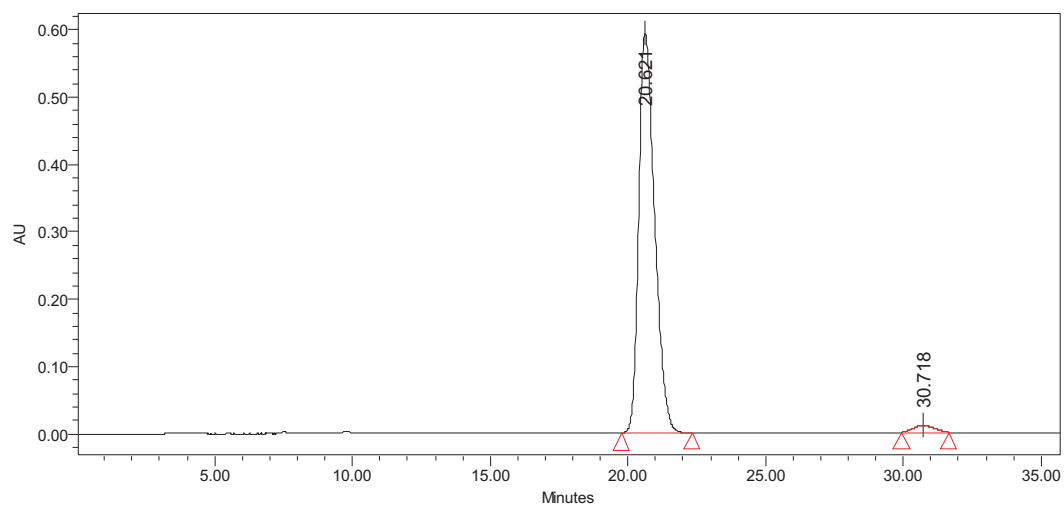

| Name | Retention Time | Area     | % Area | Height |
|------|----------------|----------|--------|--------|
| 1    | 20.621         | 23903013 | 97.79  | 593108 |
| 2    | 30.718         | 539319   | 2.21   | 10311  |

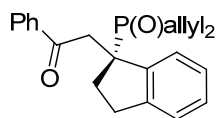

### 3h

HPLC using an AD-H (*n*-Hexane/*i*PrOH=90/10, flow rate 1.0 mL/min)

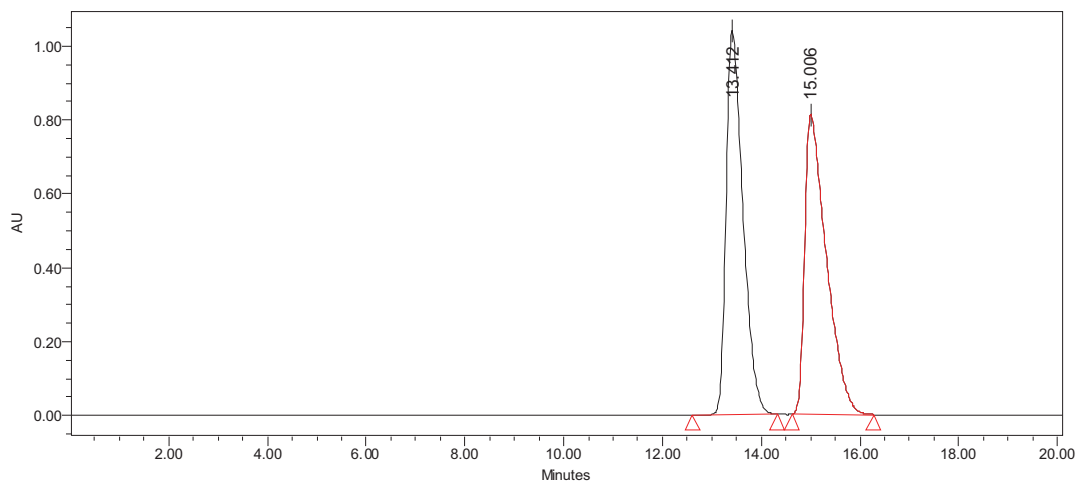

| Name | Retention Time | Area     | % Area | Height  |
|------|----------------|----------|--------|---------|
| 1    | 13.412         | 24721071 | 50.06  | 1040508 |
| 2    | 15.006         | 24666105 | 49.94  | 809860  |

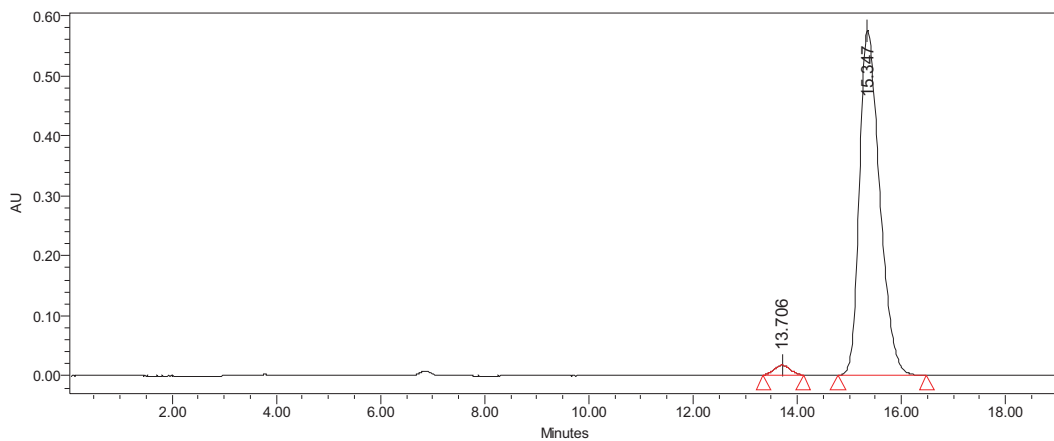

| Name | Retention Time | Area     | % Area | Height |
|------|----------------|----------|--------|--------|
| 1    | 13.706         | 351175   | 2.20   | 16383  |
| 2    | 15.347         | 15598847 | 97.80  | 575184 |

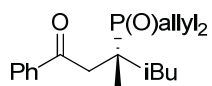

**3i**

HPLC using an AD-H (*n*-Hexane/*i*PrOH=90/10, flow rate 1.0 mL/min)

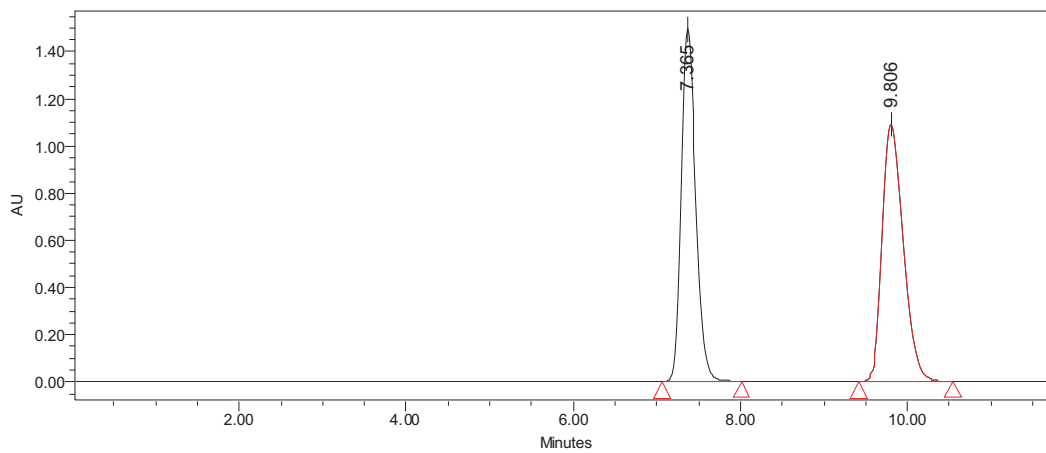

| Name | Retention Time | Area     | % Area | Height  |
|------|----------------|----------|--------|---------|
| 1    | 7.365          | 18606356 | 49.66  | 1495558 |
| 2    | 9.806          | 18860132 | 50.34  | 1092304 |

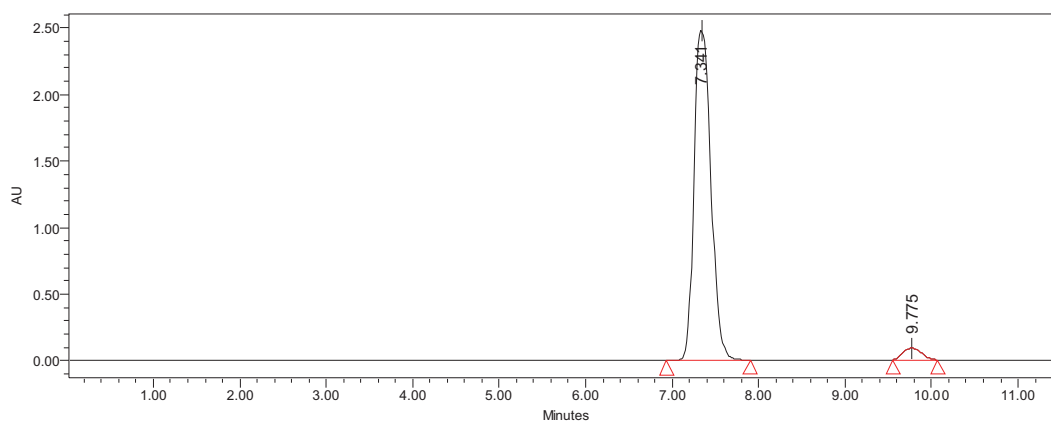

| Name | Retention Time | Area     | % Area | Height  |
|------|----------------|----------|--------|---------|
| 1    | 7.341          | 33804548 | 96.33  | 2473294 |
| 2    | 9.775          | 1287948  | 3.67   | 88857   |



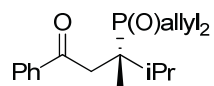

**3j**

HPLC using an AD-H (*n*-Hexane/*i*PrOH=90/10, flow rate 1.0 mL/min)

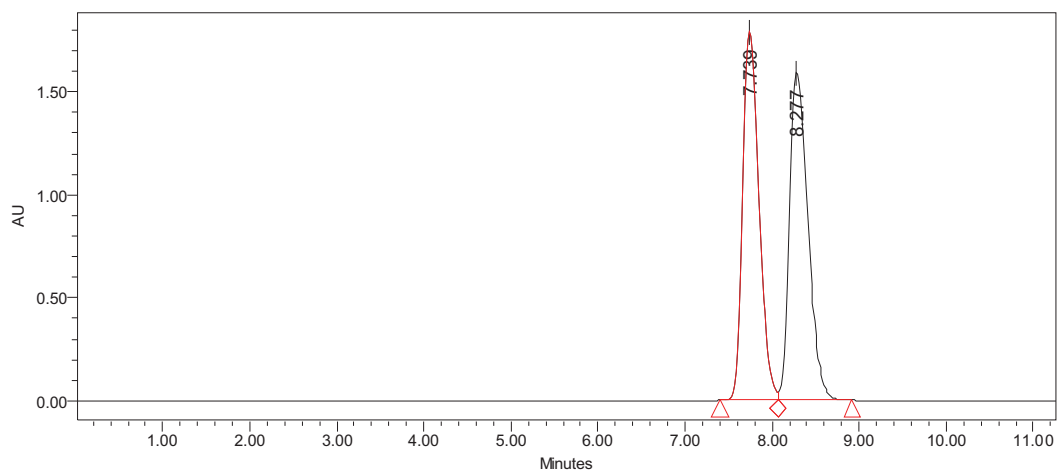

| Name | Retention Time | Area     | % Area | Height  |
|------|----------------|----------|--------|---------|
| 1    | 7.739          | 23282759 | 49.55  | 1791218 |
| 2    | 8.277          | 23708242 | 50.45  | 1593194 |

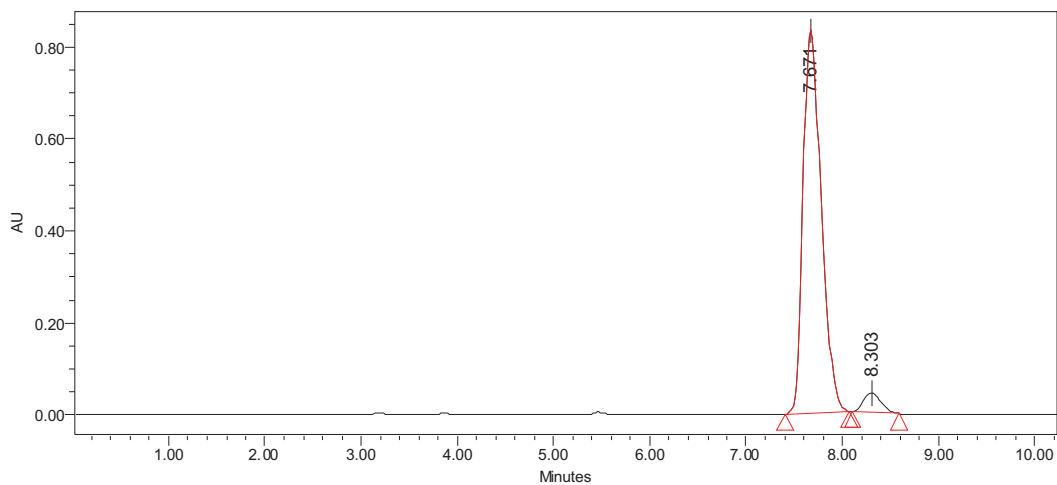

| Name | Retention Time | Area     | % Area | Height |
|------|----------------|----------|--------|--------|
| 1    | 7.671          | 10950553 | 95.24  | 832106 |
| 2    | 8.303          | 547817   | 4.76   | 42310  |

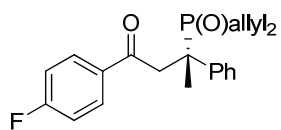

### 3k

HPLC using an AS (*n*-Hexane/*i*PrOH=90/10, flow rate 1.0 mL/min)

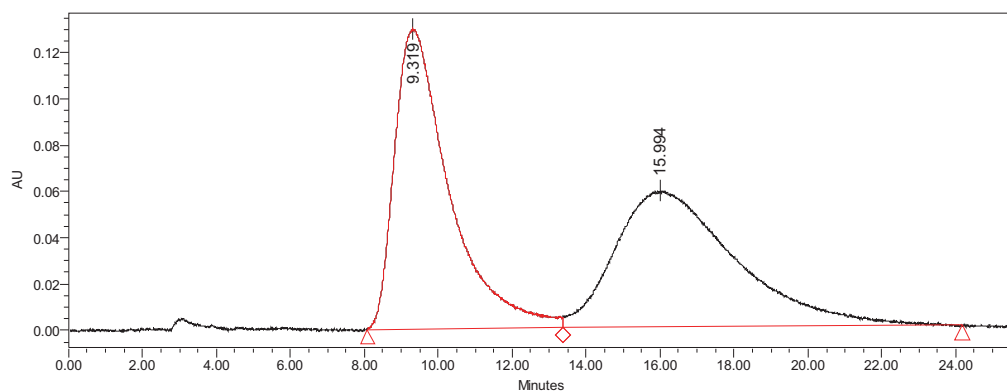

| Name | Retention Time | Area     | % Area | Height |
|------|----------------|----------|--------|--------|
| 1    | 9.319          | 13351926 | 50.11  | 129778 |
| 2    | 15.994         | 13294194 | 49.89  | 58833  |

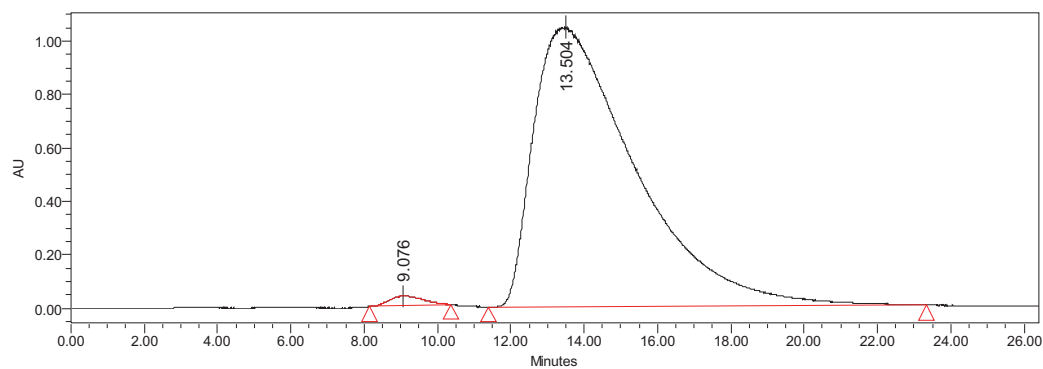

| Name | Retention Time | Area      | % Area | Height  |
|------|----------------|-----------|--------|---------|
| 1    | 9.076          | 2404455   | 1.18   | 37479   |
| 2    | 13.504         | 201726555 | 98.82  | 1047633 |

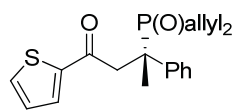

**3I**

HPLC using an OJ-H (*n*-Hexane/*i*PrOH=90/10, flow rate 1.0 mL/min)

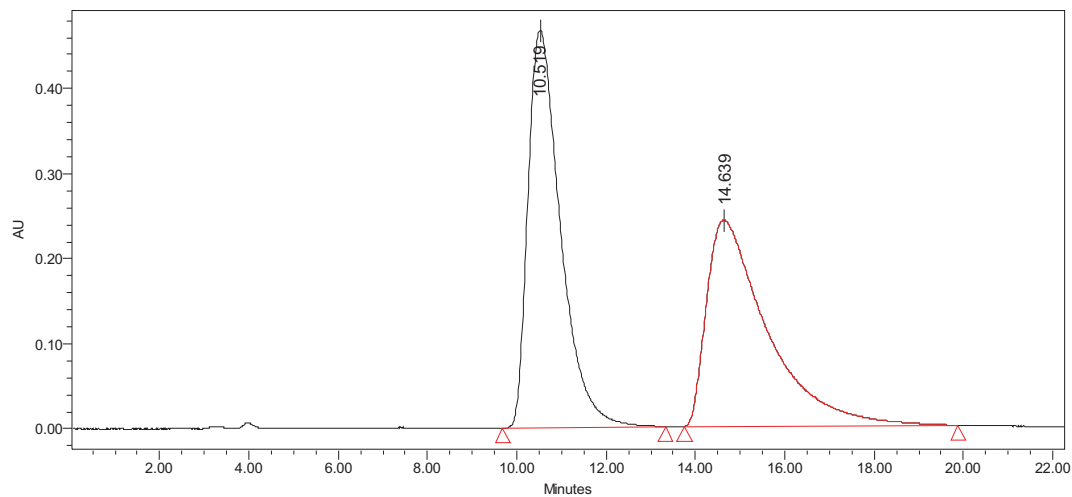

| Name | Retention Time | Area     | % Area | Height |
|------|----------------|----------|--------|--------|
| 1    | 10.519         | 23757642 | 50.93  | 467140 |
| 2    | 14.639         | 22891545 | 49.07  | 242354 |

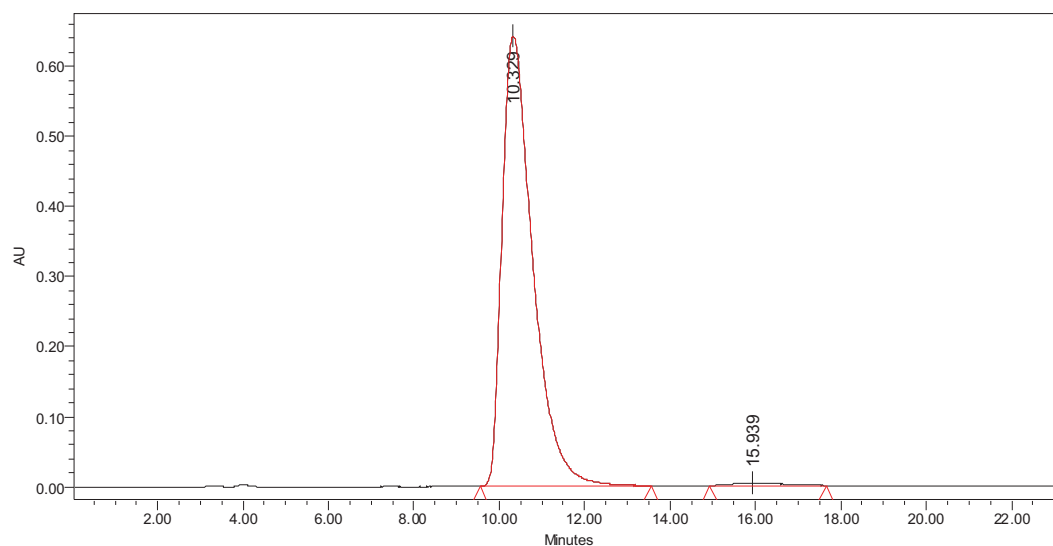

| Name | Retention Time | Area     | % Area | Height |
|------|----------------|----------|--------|--------|
| 1    | 10.329         | 32118814 | 99.06  | 641873 |
| 2    | 15.939         | 303279   | 0.94   | 3572   |

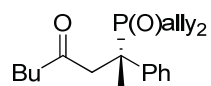

### 3m

HPLC using an AS (*n*-Hexane/*i*PrOH=95/5, flow rate 1.0 mL/min)

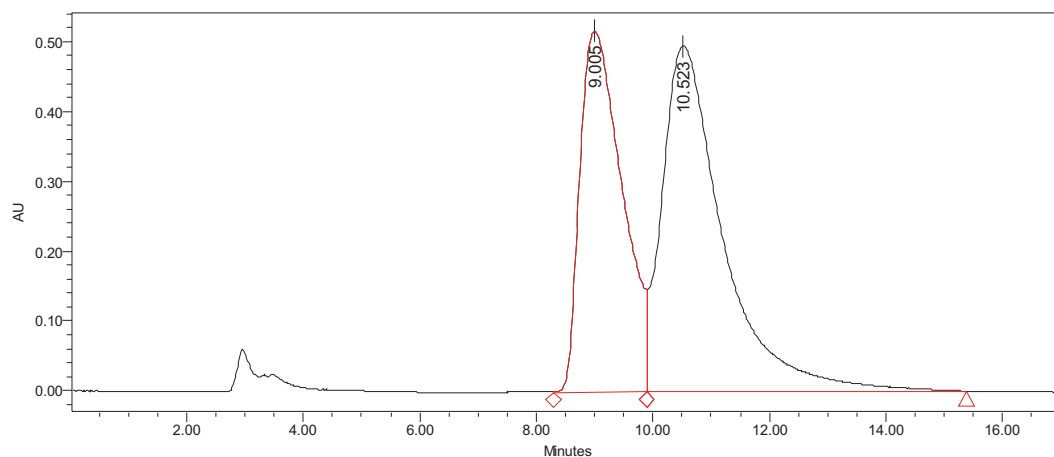

| Name | Retention Time | Area     | % Area | Height |
|------|----------------|----------|--------|--------|
| 1    | 9.005          | 26063395 | 42.02  | 516900 |
| 2    | 10.523         | 35963883 | 57.98  | 495495 |

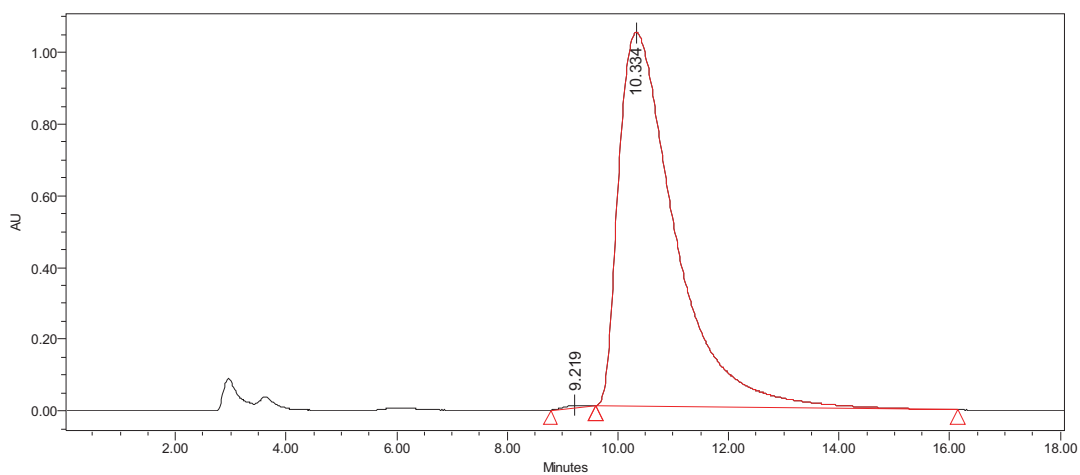

| Name | Retention Time | Area     | % Area | Height  |
|------|----------------|----------|--------|---------|
| 1    | 9.219          | 184167   | 0.25   | 7287    |
| 2    | 10.334         | 74277683 | 99.75  | 1043070 |

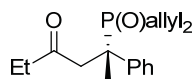

**3n**

HPLC using an AS (*n*-Hexane/*i*PrOH=90/10, flow rate 1.0 mL/min)

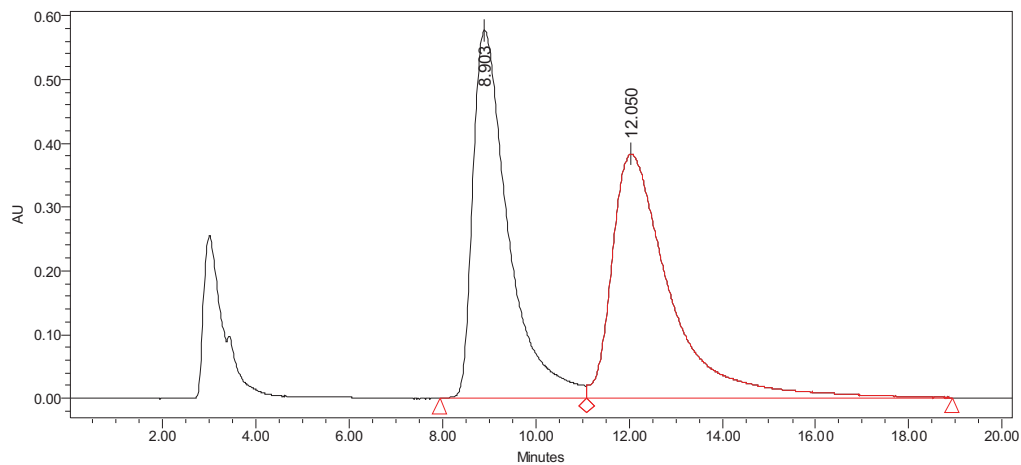

| Name | Retention Time | Area     | % Area | Height |
|------|----------------|----------|--------|--------|
| 1    | 8.903          | 30462978 | 48.04  | 577241 |
| 2    | 12.050         | 32952935 | 51.96  | 382925 |

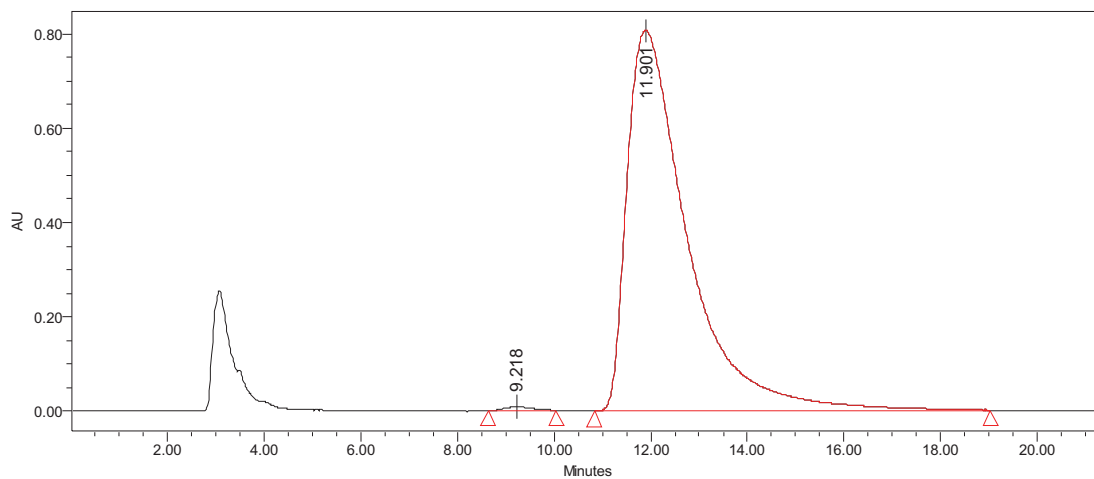

| Name | Retention Time | Area     | % Area | Height |
|------|----------------|----------|--------|--------|
| 1    | 9.218          | 327726   | 0.47   | 8212   |
| 2    | 11.901         | 70026919 | 99.53  | 806822 |

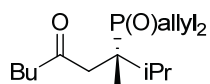

**30**

HPLC using an AD-H (*n*-Hexane/*i*PrOH=95/5, flow rate 1.0 mL/min)

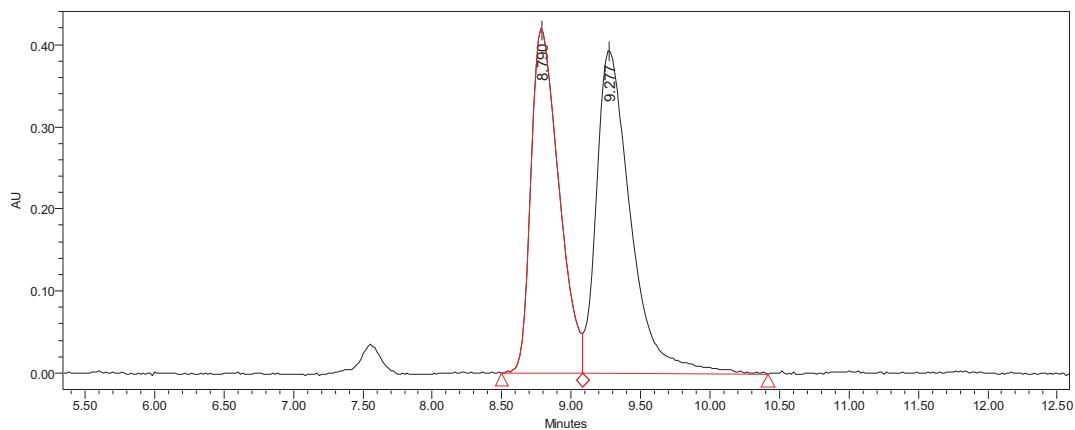

| Name | Retention Time | Area    | % Area | Height |
|------|----------------|---------|--------|--------|
| 1    | 8.790          | 5859818 | 46.36  | 420583 |
| 2    | 9.277          | 6779868 | 53.64  | 394429 |

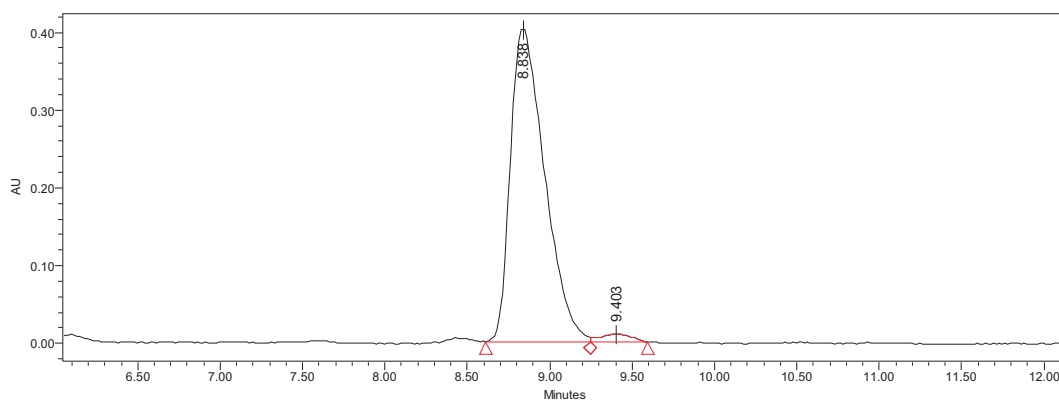

| Name | Retention Time | Area    | % Area | Height |
|------|----------------|---------|--------|--------|
| 1    | 8.838          | 5794150 | 97.85  | 402671 |
| 2    | 9.403          | 127496  | 2.15   | 9608   |

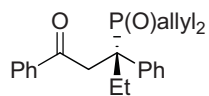

### 3p

HPLC using an OJ-H (*n*-Hexane/*i*PrOH=95/5, flow rate 1.0 mL/min)

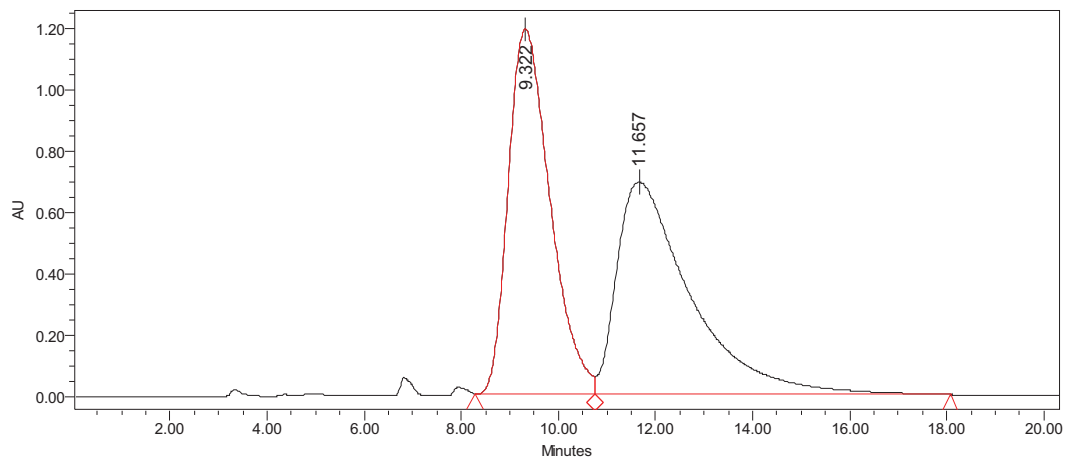

| Name | Retention Time | Area     | % Area | Height  |
|------|----------------|----------|--------|---------|
| 1    | 9.322          | 71192167 | 49.31  | 1188509 |
| 2    | 11.657         | 73183031 | 50.69  | 691285  |

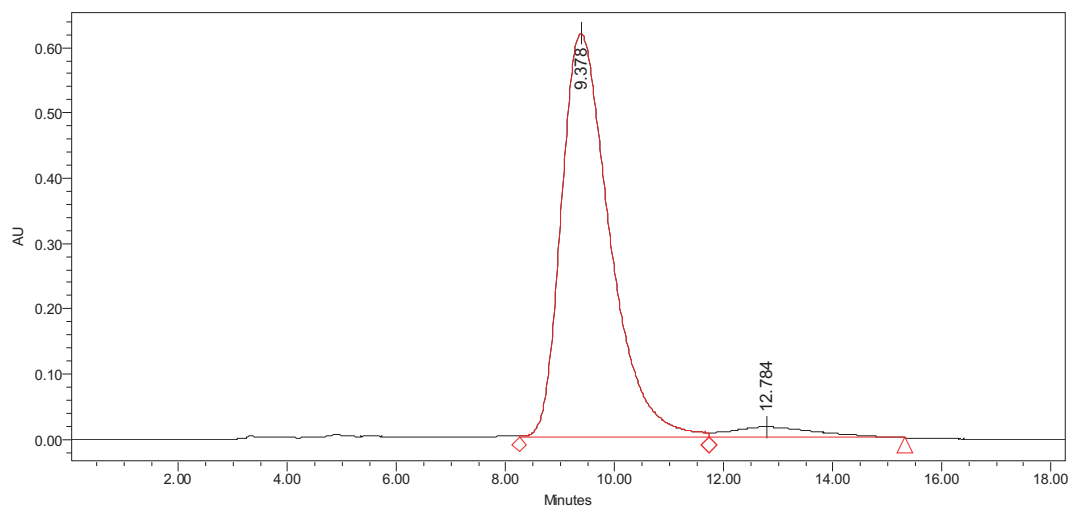

| Name | Retention Time | Area     | % Area | Height |
|------|----------------|----------|--------|--------|
| 1    | 9.378          | 38107992 | 95.54  | 618334 |
| 2    | 12.784         | 1779740  | 4.46   | 15887  |

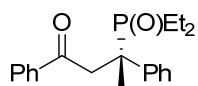

### 3q

HPLC using an OJ-H (*n*-Hexane/*i*PrOH=90/10, flow rate 1.0 mL/min)

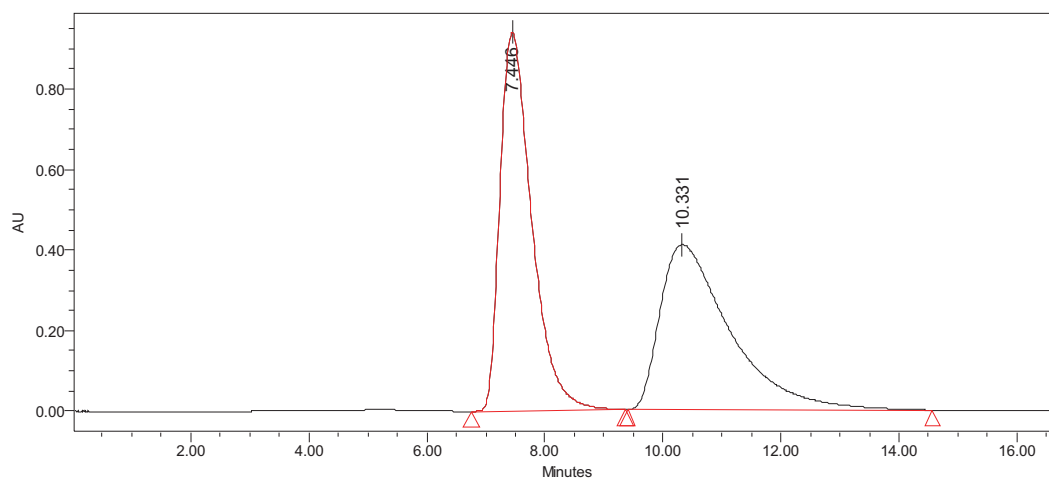

| Name | Retention Time | Area     | % Area | Height |
|------|----------------|----------|--------|--------|
| 1    | 7.446          | 35104961 | 50.94  | 939282 |
| 2    | 10.331         | 33808714 | 49.06  | 409327 |

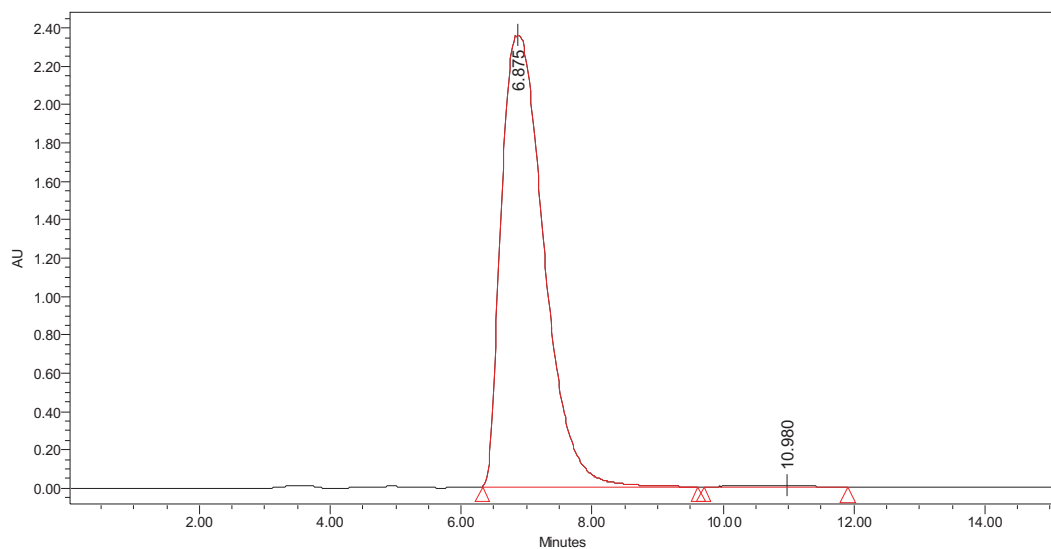

| Name | Retention Time | Area      | % Area | Height  |
|------|----------------|-----------|--------|---------|
| 1    | 6.875          | 106147372 | 99.54  | 2354015 |
| 2    | 10.980         | 486335    | 0.46   | 8402    |



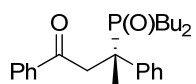

**3r**

HPLC using an AD-H (*n*-Hexane/*i*PrOH=90/10, flow rate 1.0 mL/min)

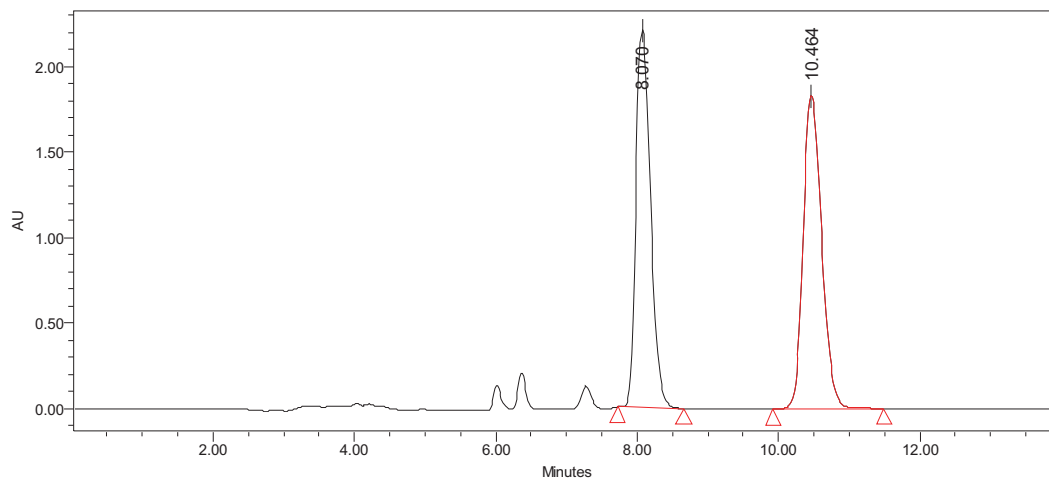

| Name | Retention Time | Area     | % Area | Height  |
|------|----------------|----------|--------|---------|
| 1    | 8.070          | 31777093 | 48.59  | 2204004 |
| 2    | 10.464         | 33623088 | 51.41  | 1829774 |

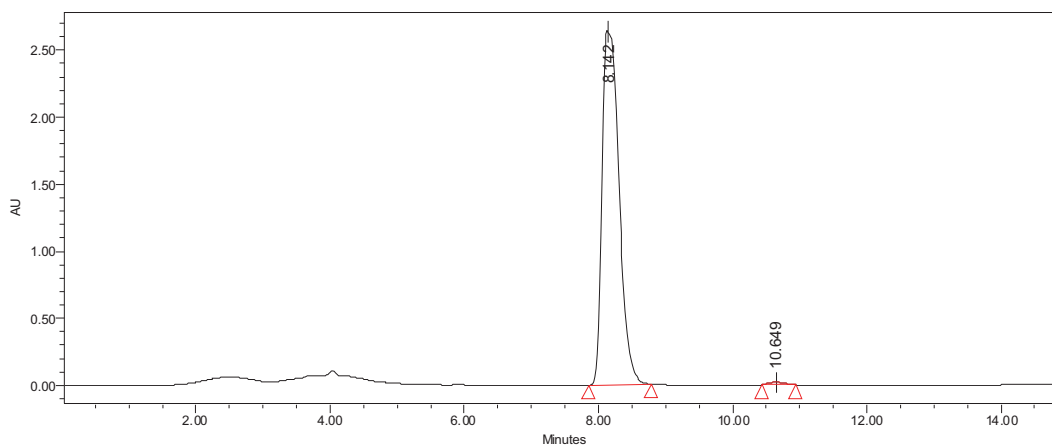

| Name | Retention Time | Area     | % Area | Height  |
|------|----------------|----------|--------|---------|
| 1    | 8.142          | 46960891 | 99.31  | 2645477 |
| 2    | 10.649         | 327421   | 0.69   | 20295   |

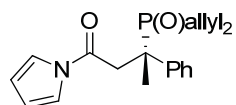

**4a**

HPLC using an OJ-H (*n*-Hexane/*i*PrOH=90/10, flow rate 1.0 mL/min)

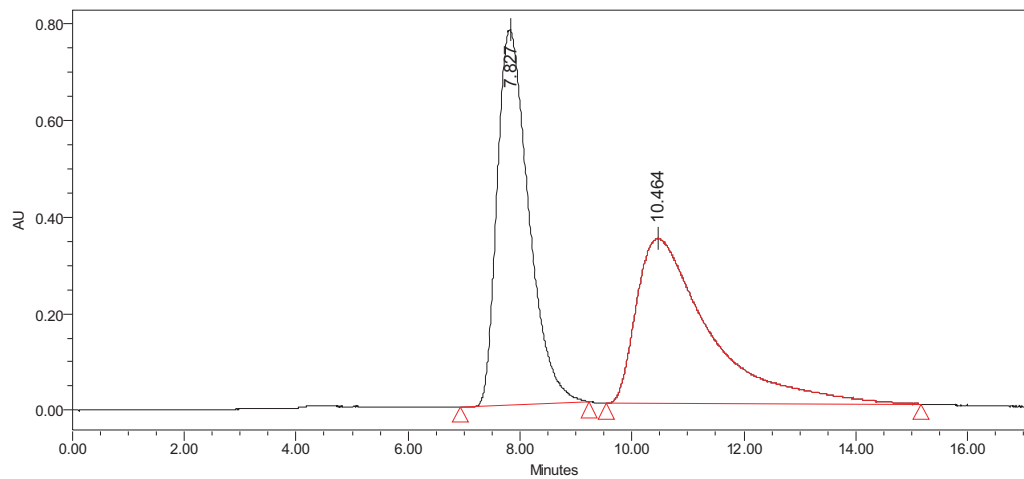

| Name | Retention Time | Area     | % Area | Height |
|------|----------------|----------|--------|--------|
| 1    | 7.827          | 30533051 | 49.66  | 778118 |
| 2    | 10.464         | 30952613 | 50.34  | 342295 |

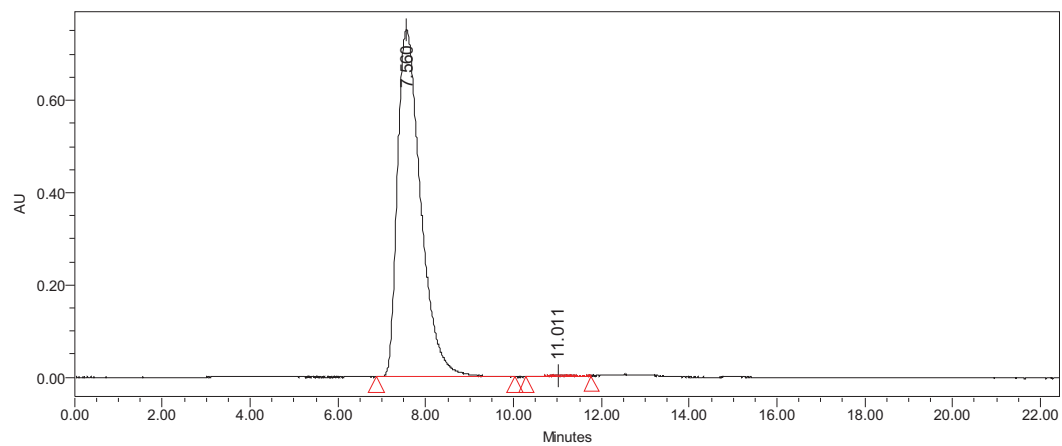

| Name | Retention Time | Area     | % Area | Height |
|------|----------------|----------|--------|--------|
| 1    | 7.560          | 27840568 | 99.78  | 753550 |
| 2    | 11.011         | 61746    | 0.22   | 1906   |

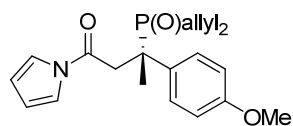

**4b**

HPLC using an As (*n*-Hexane/*i*PrOH=90/10, flow rate 1.0 mL/min)

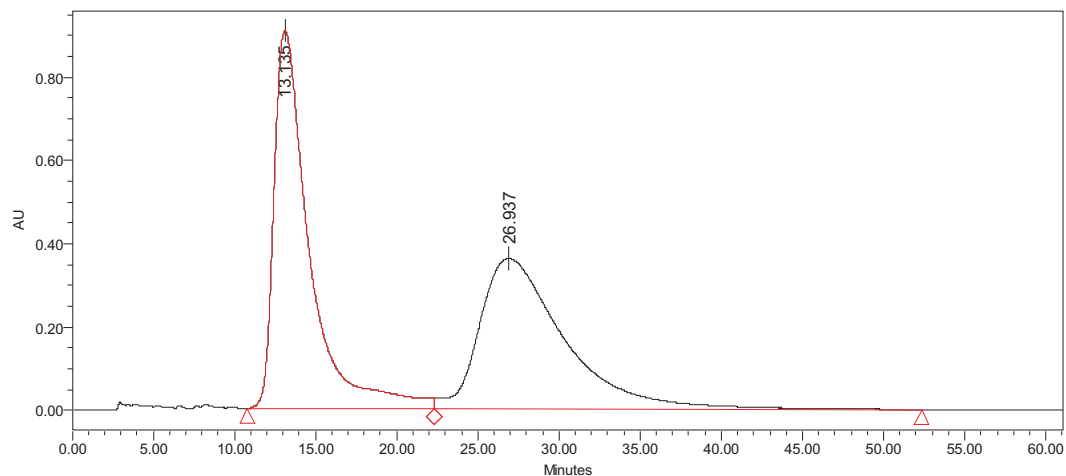

| Name | Retention Time | Area      | % Area | Height |
|------|----------------|-----------|--------|--------|
| 1    | 13.135         | 137181310 | 51.17  | 908757 |
| 2    | 26.937         | 130882962 | 48.83  | 361551 |

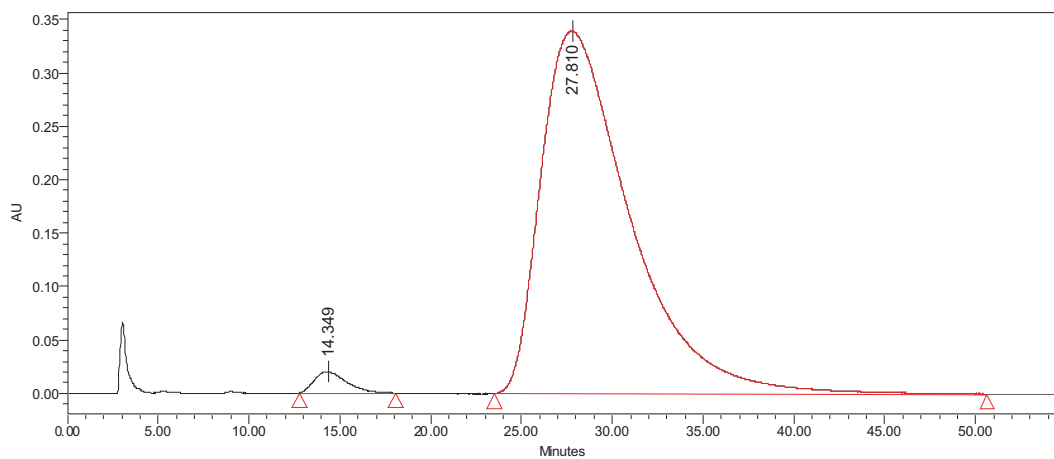

| Name | Retention Time | Area      | % Area | Height |
|------|----------------|-----------|--------|--------|
| 1    | 14.349         | 2484268   | 2.09   | 20012  |
| 2    | 27.810         | 116514951 | 97.91  | 339537 |

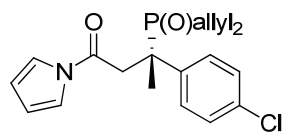

**4c**

HPLC using an AD-H (*n*-Hexane/*i*PrOH=90/10, flow rate 1.0 mL/min)

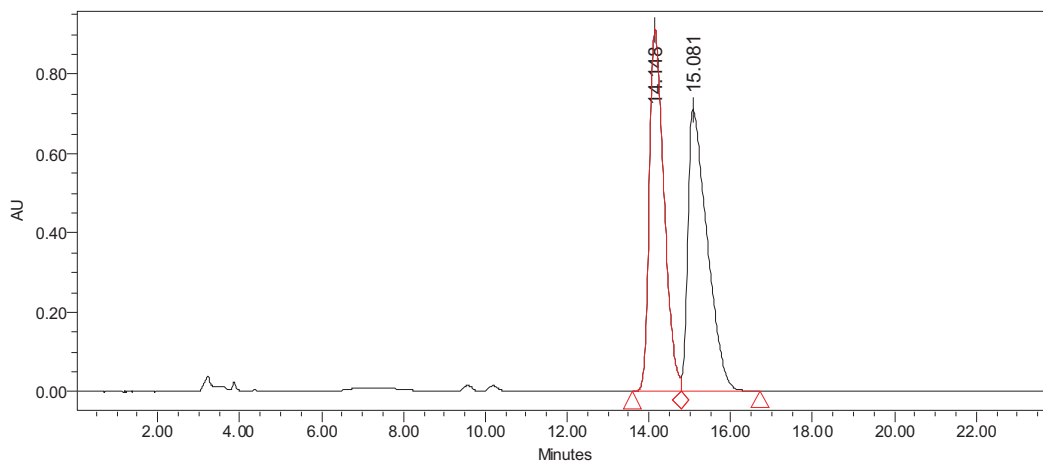

| Name | Retention Time | Area     | % Area | Height |
|------|----------------|----------|--------|--------|
| 1    | 14.148         | 22689977 | 49.41  | 912514 |
| 2    | 15.081         | 23227245 | 50.59  | 709267 |

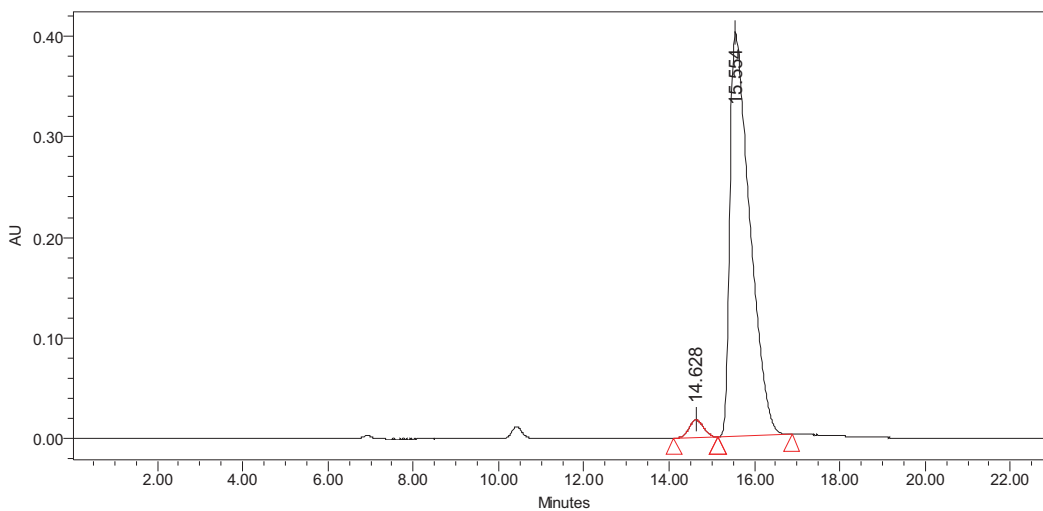

| Name | Retention Time | Area     | % Area | Height |
|------|----------------|----------|--------|--------|
| 1    | 14.628         | 427375   | 3.12   | 18078  |
| 2    | 15.554         | 13249420 | 96.88  | 402993 |

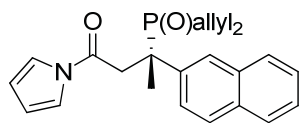

**4d**

HPLC using an AD-H (*n*-Hexane/*i*PrOH=90/10, flow rate 1.0 mL/min)

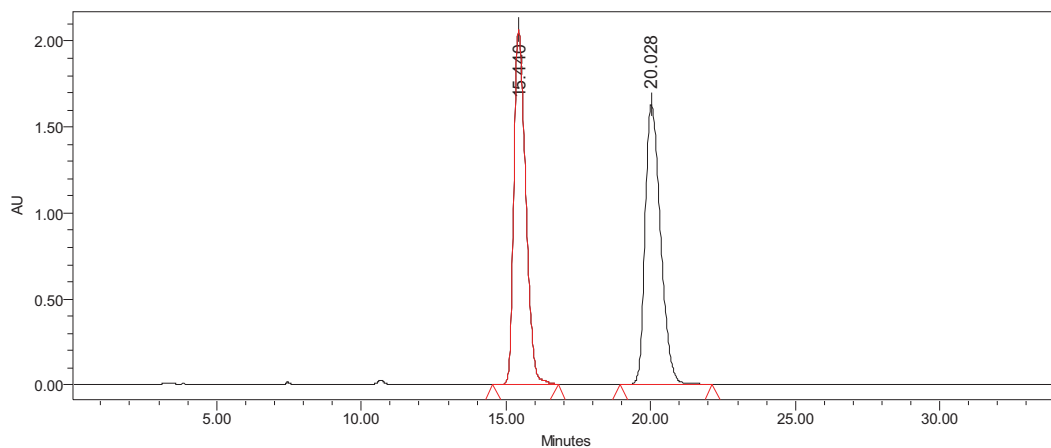

| Name | Retention Time | Area     | % Area | Height  |
|------|----------------|----------|--------|---------|
| 1    | 15.440         | 59039093 | 49.32  | 2061191 |
| 2    | 20.028         | 60671372 | 50.68  | 1631041 |

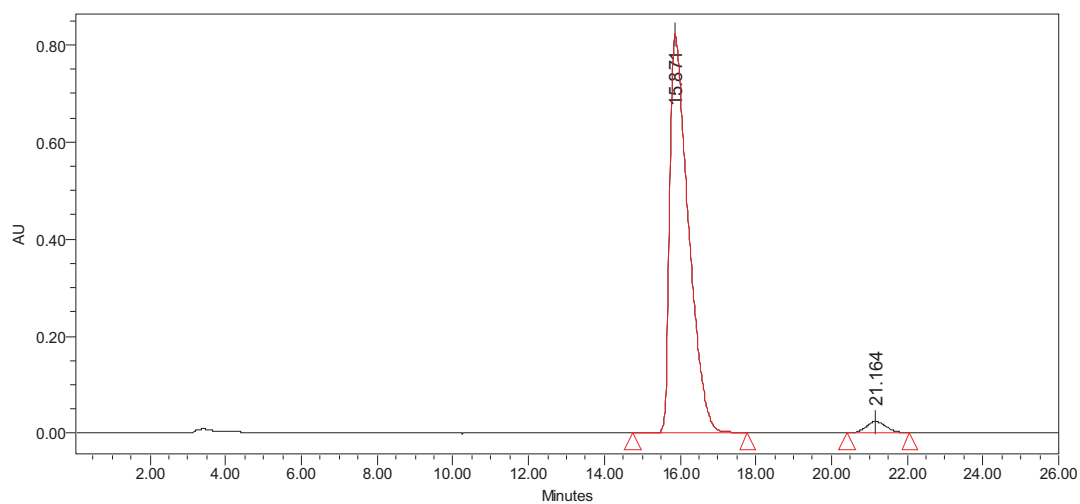

| Name | Retention Time | Area     | % Area | Height |
|------|----------------|----------|--------|--------|
| 1    | 15.871         | 28014889 | 96.92  | 822476 |
| 2    | 21.164         | 891133   | 3.08   | 23436  |

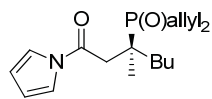

**4e**

HPLC using an AD-H (*n*-Hexane/*i*PrOH=90/10, flow rate 1.0 mL/min)

From *Z*-**5e**:

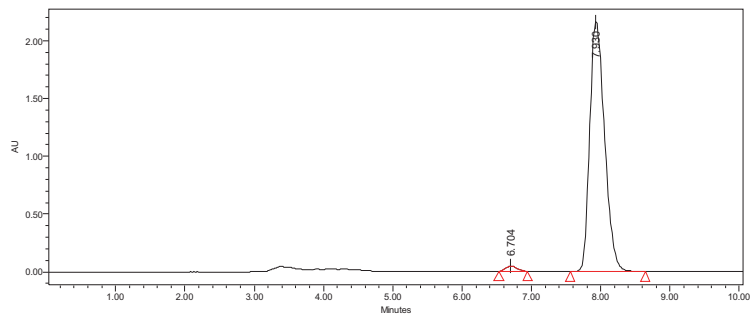

| Name | Retention Time | Area     | % Area | Height  |
|------|----------------|----------|--------|---------|
| 1    | 6.704          | 536497   | 1.64   | 47597   |
| 2    | 7.930          | 32195468 | 98.36  | 2160587 |

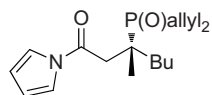

From *E*-**5e**:

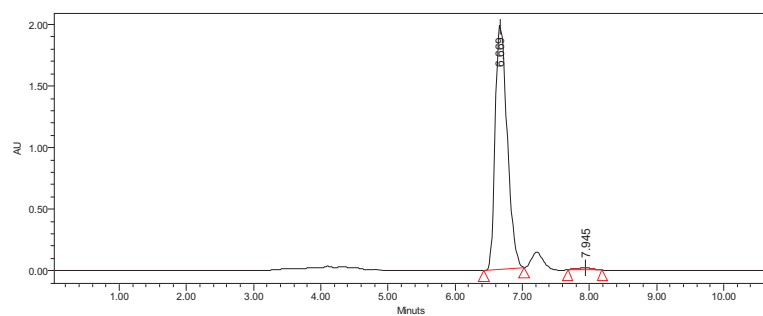

| Name | Retention Time | Area     | % Area | Height  |
|------|----------------|----------|--------|---------|
| 1    | 6.669          | 24715906 | 98.90  | 1987575 |
| 2    | 7.945          | 274047   | 1.10   | 16645   |

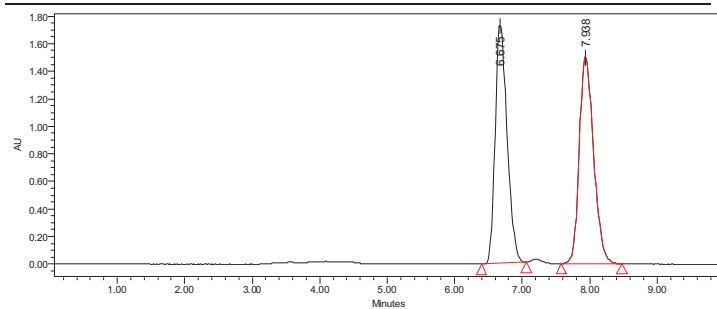

| Name | Retention Time | Area     | % Area | Height  |
|------|----------------|----------|--------|---------|
| 1    | 6.675          | 21244250 | 48.96  | 1732522 |
| 2    | 7.938          | 22147292 | 51.04  | 1495482 |

# Copies of NMR spectra

```

NAME          101223
EXPNO         1
PROCNO        1
Date_         20101223
Time         10.26
INSTRUM       spect
PROBHD        5 mm PABBO BB-
PULPROG       zg30
TD            65536
SOLVENT       CDCl3
NS            8
DS            2
SWH           6188.119 Hz
FIDRES       0.094423 Hz
AQ           5.2953587 sec
RG           71.8
DW           80.800 usec
DE           6.50 usec
TE           289.0 K
D1           1.0000000 sec
TD0          1
===== CHANNEL f1 =====
NUC1          1H
P1           11.80 usec
PL1          0.00 dB
PL1W         11.55467796 W
SF01         300.1318534 MHz
SI           32768
SF           300.1300000 MHz
WDW          EM
SSB          0
LB           0.30 Hz
GB           0
PC           1.00
    
```

0.000

7.909  
7.885  
7.880  
7.492  
7.485  
7.465  
7.460  
7.443  
7.417  
7.332  
7.306  
7.267  
6.010  
5.994  
5.986  
5.310  
5.306  
5.290  
5.277  
5.273  
5.156  
5.152  
5.122  
5.119  
5.075  
5.068  
4.469  
4.441  
4.409  
4.382  
3.608  
3.593  
3.549  
3.533  
2.781  
2.755  
2.738  
2.714  
2.696  
2.678  
2.655  
2.313  
2.288  
2.288  
2.268  
2.243  
1.911  
1.856

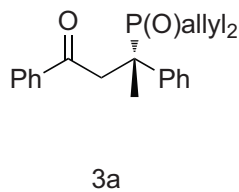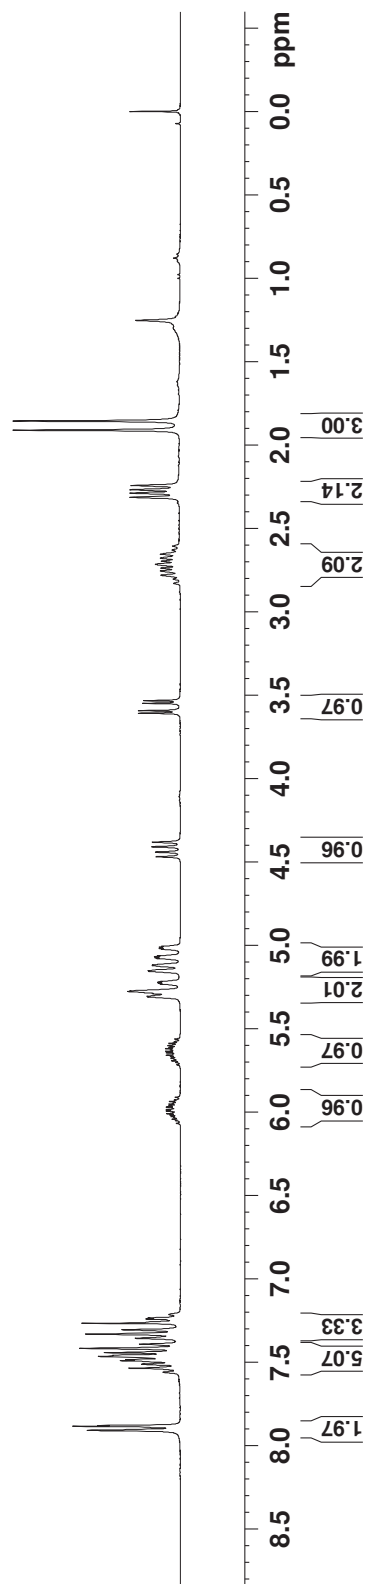

```

NAME 101223
EXPNO 2
PROCNO 1
Date_ 20101223
Time 10.47
INSTRUM spect
PROBHD 5 mm PABBO BB-
PULPROG zgpg30
TD 65536
SOLVENT CDC13
NS 509
DS 4
SWH 18028.846 Hz
FIDRES 0.275098 Hz
AQ 1.8175818 sec
RG 203
DW 27.733 usec
DE 6.50 usec
TE 290.3 K
D1 2.00000000 sec
D11 0.03000000 sec
TD0 1

===== CHANNEL f1 =====
NUC1 13C
P1 9.70 usec
PL1 0.00 dB
PL1W 29.38907051 W
SF01 75.4752953 MHz

===== CHANNEL f2 =====
CPDPRG2 waltz16
NUC2 1H
PCPD2 80.00 usec
PL2 1.00 dB
PL12 17.00 dB
PL13 17.00 dB
PL12W 9.17820644 W
PL12W 0.23054813 W
PL13W 0.23054813 W
SF02 300.1312005 MHz
SI 32768
ST 75.4677514 MHz
WDW EM
SSB 0
LB 1.00 Hz
GB 0
PC 1.40
    
```

19.30  
 30.38  
 30.84  
 31.20  
 31.61  
 42.54  
 43.52  
 44.28

76.58  
 77.00  
 77.43

119.98  
 120.12  
 120.28  
 120.42  
 126.86  
 126.90  
 126.99  
 127.05  
 127.90  
 128.18  
 128.29  
 128.52  
 128.57  
 128.68  
 133.11  
 137.32  
 137.35  
 139.39  
 139.44

196.08  
 196.27

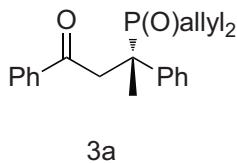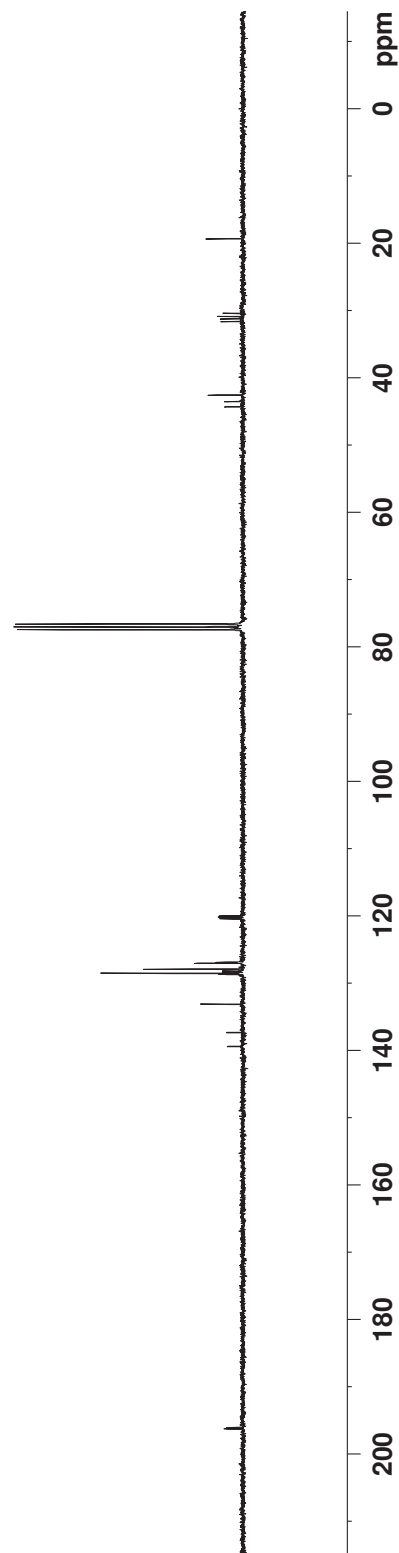



```

NAME          101223
EXPNO         3
PROCNO        1
Date_         20101223
Time_         11.04
INSTRUM       spect
PROBHD        5 mm PABBO BB-
PULPROG       zgpg30
TD            65536
SOLVENT       CDCl3
NS            16
DS            4
SWH           49019.609 Hz
FIDRES        0.747980 Hz
AQ            0.6685172 sec
RG            203
DW            10.200 usec
DE            6.50 usec
TE            289.9 K
D1            2.0000000 sec
D11           0.0300000 sec
TD0           1

===== CHANNEL f1 =====
NUC1          31P
P1            9.10 usec
PL1           0.00 dB
PL1W          36.92473221 W
SFO1          121.4887762 MHz

===== CHANNEL f2 =====
CPDPRG2       waltz16
NUC2          1H
PCPD2         80.00 usec
PL2           1.00 dB
PL12          17.00 dB
PL13          17.00 dB
PL12W         9.17820644 W
PL13W         0.23054613 W
SFO2          300.1312005 MHz
SI            32768
SF            121.4948510 MHz
WDW           EM
SSB           0
LB            1.00 Hz
GB            0
PC            1.40
    
```

49.60  
49.86  
50.09

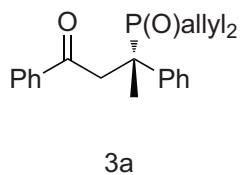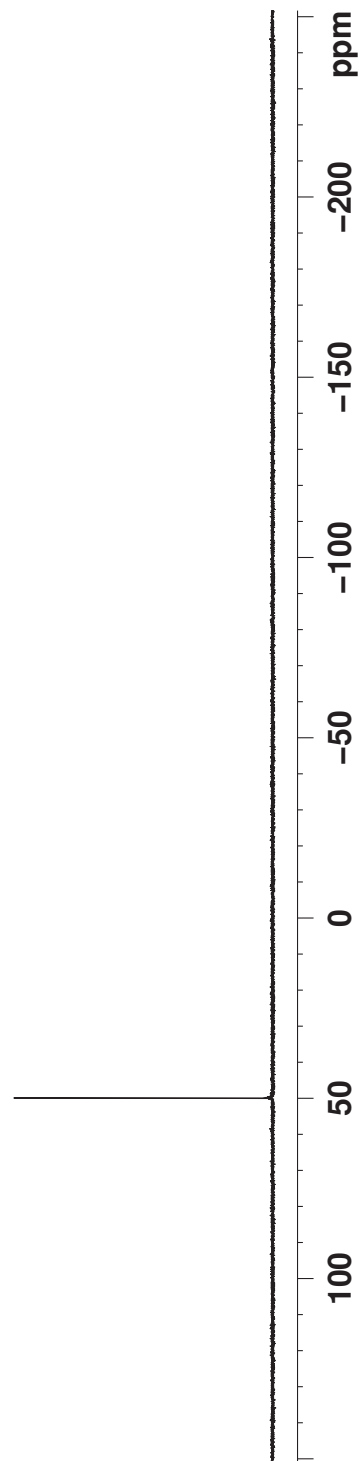

```

NAME      110112
EXPNO     1
PROCNO    1
Date_     20110112
Time      11.49
INSTRUM   spect
PROBHD    5 mm PABBO BB-
PULPROG   zg30
TD         65536
SOLVENT   CDCl3
NS         8
DS         2
SWH        6188.119 Hz
FIDRES     0.094423 Hz
AQ         5.22953587 sec
RG         36
DM         80.800 usec
DE         6.50 usec
TE         285.9 K
D1         1.00000000 sec
TD0        1

===== CHANNEL f1 =====
NUC1      1H
P1         11.80 usec
PL1        0.00 db
FLLW       11.5546736 W
SFO1       300.1318534 MHz
SI         32768
SF         300.1299965 MHz
WDW        EM
SSE         0
LB         0.30 Hz
GB         0
PC         1.00
    
```

0.000

7.899  
7.871  
7.573  
7.569  
7.548  
7.524  
7.521  
7.447  
7.438  
7.426  
7.378  
7.283  
6.044  
6.027  
6.020  
6.004  
5.996  
5.987  
5.646  
5.636  
5.622  
5.614  
5.330  
5.300  
5.247  
5.162  
5.159  
5.129  
5.125  
5.070  
5.066  
5.013  
5.009  
4.435  
4.408  
4.375  
4.348  
3.592  
3.578  
3.532  
3.518  
2.752  
2.712  
2.295  
2.270  
2.252  
2.248  
2.224  
1.870  
1.815

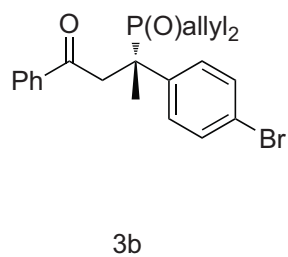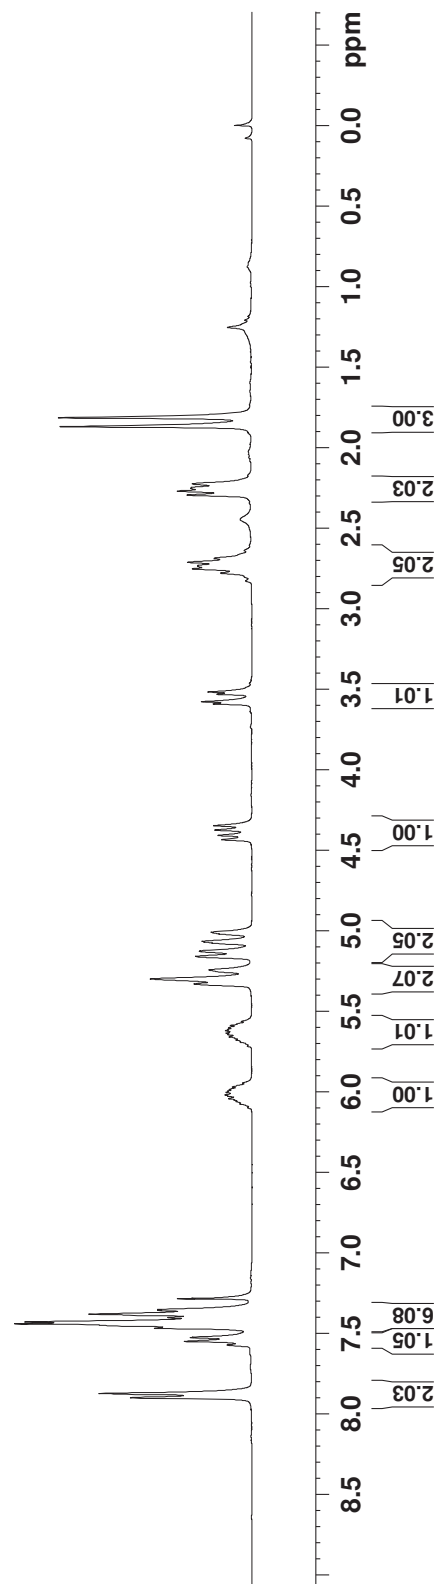

```

NAME 110112
EXPNO 6
PROCNO 1
Date_ 20110112
Time 11.36
INSTRUM spect
PROBHD 5 mm PABBO BB-
PULPROG zgpg30
TD 65536
SOLVENT CDC13
NS 200
DS 4
SWH 18028.846 Hz
FIDRES 0.275098 Hz
AQ 1.8175818 sec
RG 203
DW 27.733 usec
DE 6.50 usec
TE 286.6 K
D1 2.00000000 sec
D11 0.03000000 sec
TD0 1

===== CHANNEL f1 =====
NUC1 13C
P1 9.70 usec
PL1 0.00 dB
PL1W 29.38907051 W
SF01 75.4752953 MHz

===== CHANNEL f2 =====
CPDPRG2 waltz16
NUC2 1H
PCPD2 80.00 usec
PL2 1.00 dB
PL12 17.00 dB
PL13 17.00 dB
PL14 17.00 dB
PL15 17.00 dB
PL16 17.00 dB
PL17 17.00 dB
PL18 17.00 dB
PL19 17.00 dB
PL20 17.00 dB
PL21 17.00 dB
PL22 17.00 dB
PL23 17.00 dB
PL24 17.00 dB
PL25 17.00 dB
PL26 17.00 dB
PL27 17.00 dB
PL28 17.00 dB
PL29 17.00 dB
PL30 17.00 dB
PL31 17.00 dB
PL32 17.00 dB
PL33 17.00 dB
PL34 17.00 dB
PL35 17.00 dB
PL36 17.00 dB
PL37 17.00 dB
PL38 17.00 dB
PL39 17.00 dB
PL40 17.00 dB
PL41 17.00 dB
PL42 17.00 dB
PL43 17.00 dB
PL44 17.00 dB
PL45 17.00 dB
PL46 17.00 dB
PL47 17.00 dB
PL48 17.00 dB
PL49 17.00 dB
PL50 17.00 dB
PL51 17.00 dB
PL52 17.00 dB
PL53 17.00 dB
PL54 17.00 dB
PL55 17.00 dB
PL56 17.00 dB
PL57 17.00 dB
PL58 17.00 dB
PL59 17.00 dB
PL60 17.00 dB
PL61 17.00 dB
PL62 17.00 dB
PL63 17.00 dB
PL64 17.00 dB
PL65 17.00 dB
PL66 17.00 dB
PL67 17.00 dB
PL68 17.00 dB
PL69 17.00 dB
PL70 17.00 dB
PL71 17.00 dB
PL72 17.00 dB
PL73 17.00 dB
PL74 17.00 dB
PL75 17.00 dB
PL76 17.00 dB
PL77 17.00 dB
PL78 17.00 dB
PL79 17.00 dB
PL80 17.00 dB
PL81 17.00 dB
PL82 17.00 dB
PL83 17.00 dB
PL84 17.00 dB
PL85 17.00 dB
PL86 17.00 dB
PL87 17.00 dB
PL88 17.00 dB
PL89 17.00 dB
PL90 17.00 dB
PL91 17.00 dB
PL92 17.00 dB
PL93 17.00 dB
PL94 17.00 dB
PL95 17.00 dB
PL96 17.00 dB
PL97 17.00 dB
PL98 17.00 dB
PL99 17.00 dB
PL100 17.00 dB
PL101 17.00 dB
PL102 17.00 dB
PL103 17.00 dB
PL104 17.00 dB
PL105 17.00 dB
PL106 17.00 dB
PL107 17.00 dB
PL108 17.00 dB
PL109 17.00 dB
PL110 17.00 dB
PL111 17.00 dB
PL112 17.00 dB
PL113 17.00 dB
PL114 17.00 dB
PL115 17.00 dB
PL116 17.00 dB
PL117 17.00 dB
PL118 17.00 dB
PL119 17.00 dB
PL120 17.00 dB
PL121 17.00 dB
PL122 17.00 dB
PL123 17.00 dB
PL124 17.00 dB
PL125 17.00 dB
PL126 17.00 dB
PL127 17.00 dB
PL128 17.00 dB
PL129 17.00 dB
PL130 17.00 dB
PL131 17.00 dB
PL132 17.00 dB
PL133 17.00 dB
PL134 17.00 dB
PL135 17.00 dB
PL136 17.00 dB
PL137 17.00 dB
PL138 17.00 dB
PL139 17.00 dB
PL140 17.00 dB
PL141 17.00 dB
PL142 17.00 dB
PL143 17.00 dB
PL144 17.00 dB
PL145 17.00 dB
PL146 17.00 dB
PL147 17.00 dB
PL148 17.00 dB
PL149 17.00 dB
PL150 17.00 dB
PL151 17.00 dB
PL152 17.00 dB
PL153 17.00 dB
PL154 17.00 dB
PL155 17.00 dB
PL156 17.00 dB
PL157 17.00 dB
PL158 17.00 dB
PL159 17.00 dB
PL160 17.00 dB
PL161 17.00 dB
PL162 17.00 dB
PL163 17.00 dB
PL164 17.00 dB
PL165 17.00 dB
PL166 17.00 dB
PL167 17.00 dB
PL168 17.00 dB
PL169 17.00 dB
PL170 17.00 dB
PL171 17.00 dB
PL172 17.00 dB
PL173 17.00 dB
PL174 17.00 dB
PL175 17.00 dB
PL176 17.00 dB
PL177 17.00 dB
PL178 17.00 dB
PL179 17.00 dB
PL180 17.00 dB
PL181 17.00 dB
PL182 17.00 dB
PL183 17.00 dB
PL184 17.00 dB
PL185 17.00 dB
PL186 17.00 dB
PL187 17.00 dB
PL188 17.00 dB
PL189 17.00 dB
PL190 17.00 dB
PL191 17.00 dB
PL192 17.00 dB
PL193 17.00 dB
PL194 17.00 dB
PL195 17.00 dB
PL196 17.00 dB
PL197 17.00 dB
PL198 17.00 dB
PL199 17.00 dB
PL200 17.00 dB
PL201 17.00 dB
PL202 17.00 dB
PL203 17.00 dB
PL204 17.00 dB
PL205 17.00 dB
PL206 17.00 dB
PL207 17.00 dB
PL208 17.00 dB
PL209 17.00 dB
PL210 17.00 dB
PL211 17.00 dB
PL212 17.00 dB
PL213 17.00 dB
PL214 17.00 dB
PL215 17.00 dB
PL216 17.00 dB
PL217 17.00 dB
PL218 17.00 dB
PL219 17.00 dB
PL220 17.00 dB
PL221 17.00 dB
PL222 17.00 dB
PL223 17.00 dB
PL224 17.00 dB
PL225 17.00 dB
PL226 17.00 dB
PL227 17.00 dB
PL228 17.00 dB
PL229 17.00 dB
PL230 17.00 dB
PL231 17.00 dB
PL232 17.00 dB
PL233 17.00 dB
PL234 17.00 dB
PL235 17.00 dB
PL236 17.00 dB
PL237 17.00 dB
PL238 17.00 dB
PL239 17.00 dB
PL240 17.00 dB
PL241 17.00 dB
PL242 17.00 dB
PL243 17.00 dB
PL244 17.00 dB
PL245 17.00 dB
PL246 17.00 dB
PL247 17.00 dB
PL248 17.00 dB
PL249 17.00 dB
PL250 17.00 dB
PL251 17.00 dB
PL252 17.00 dB
PL253 17.00 dB
PL254 17.00 dB
PL255 17.00 dB
PL256 17.00 dB
PL257 17.00 dB
PL258 17.00 dB
PL259 17.00 dB
PL260 17.00 dB
PL261 17.00 dB
PL262 17.00 dB
PL263 17.00 dB
PL264 17.00 dB
PL265 17.00 dB
PL266 17.00 dB
PL267 17.00 dB
PL268 17.00 dB
PL269 17.00 dB
PL270 17.00 dB
PL271 17.00 dB
PL272 17.00 dB
PL273 17.00 dB
PL274 17.00 dB
PL275 17.00 dB
PL276 17.00 dB
PL277 17.00 dB
PL278 17.00 dB
PL279 17.00 dB
PL280 17.00 dB
PL281 17.00 dB
PL282 17.00 dB
PL283 17.00 dB
PL284 17.00 dB
PL285 17.00 dB
PL286 17.00 dB
PL287 17.00 dB
PL288 17.00 dB
PL289 17.00 dB
PL290 17.00 dB
PL291 17.00 dB
PL292 17.00 dB
PL293 17.00 dB
PL294 17.00 dB
PL295 17.00 dB
PL296 17.00 dB
PL297 17.00 dB
PL298 17.00 dB
PL299 17.00 dB
PL300 17.00 dB
PL301 17.00 dB
PL302 17.00 dB
PL303 17.00 dB
PL304 17.00 dB
PL305 17.00 dB
PL306 17.00 dB
PL307 17.00 dB
PL308 17.00 dB
PL309 17.00 dB
PL310 17.00 dB
PL311 17.00 dB
PL312 17.00 dB
PL313 17.00 dB
PL314 17.00 dB
PL315 17.00 dB
PL316 17.00 dB
PL317 17.00 dB
PL318 17.00 dB
PL319 17.00 dB
PL320 17.00 dB
PL321 17.00 dB
PL322 17.00 dB
PL323 17.00 dB
PL324 17.00 dB
PL325 17.00 dB
PL326 17.00 dB
PL327 17.00 dB
PL328 17.00 dB
PL329 17.00 dB
PL330 17.00 dB
PL331 17.00 dB
PL332 17.00 dB
PL333 17.00 dB
PL334 17.00 dB
PL335 17.00 dB
PL336 17.00 dB
PL337 17.00 dB
PL338 17.00 dB
PL339 17.00 dB
PL340 17.00 dB
PL341 17.00 dB
PL342 17.00 dB
PL343 17.00 dB
PL344 17.00 dB
PL345 17.00 dB
PL346 17.00 dB
PL347 17.00 dB
PL348 17.00 dB
PL349 17.00 dB
PL350 17.00 dB
PL351 17.00 dB
PL352 17.00 dB
PL353 17.00 dB
PL354 17.00 dB
PL355 17.00 dB
PL356 17.00 dB
PL357 17.00 dB
PL358 17.00 dB
PL359 17.00 dB
PL360 17.00 dB
PL361 17.00 dB
PL362 17.00 dB
PL363 17.00 dB
PL364 17.00 dB
PL365 17.00 dB
PL366 17.00 dB
PL367 17.00 dB
PL368 17.00 dB
PL369 17.00 dB
PL370 17.00 dB
PL371 17.00 dB
PL372 17.00 dB
PL373 17.00 dB
PL374 17.00 dB
PL375 17.00 dB
PL376 17.00 dB
PL377 17.00 dB
PL378 17.00 dB
PL379 17.00 dB
PL380 17.00 dB
PL381 17.00 dB
PL382 17.00 dB
PL383 17.00 dB
PL384 17.00 dB
PL385 17.00 dB
PL386 17.00 dB
PL387 17.00 dB
PL388 17.00 dB
PL389 17.00 dB
PL390 17.00 dB
PL391 17.00 dB
PL392 17.00 dB
PL393 17.00 dB
PL394 17.00 dB
PL395 17.00 dB
PL396 17.00 dB
PL397 17.00 dB
PL398 17.00 dB
PL399 17.00 dB
PL400 17.00 dB
PL401 17.00 dB
PL402 17.00 dB
PL403 17.00 dB
PL404 17.00 dB
PL405 17.00 dB
PL406 17.00 dB
PL407 17.00 dB
PL408 17.00 dB
PL409 17.00 dB
PL410 17.00 dB
PL411 17.00 dB
PL412 17.00 dB
PL413 17.00 dB
PL414 17.00 dB
PL415 17.00 dB
PL416 17.00 dB
PL417 17.00 dB
PL418 17.00 dB
PL419 17.00 dB
PL420 17.00 dB
PL421 17.00 dB
PL422 17.00 dB
PL423 17.00 dB
PL424 17.00 dB
PL425 17.00 dB
PL426 17.00 dB
PL427 17.00 dB
PL428 17.00 dB
PL429 17.00 dB
PL430 17.00 dB
PL431 17.00 dB
PL432 17.00 dB
PL433 17.00 dB
PL434 17.00 dB
PL435 17.00 dB
PL436 17.00 dB
PL437 17.00 dB
PL438 17.00 dB
PL439 17.00 dB
PL440 17.00 dB
PL441 17.00 dB
PL442 17.00 dB
PL443 17.00 dB
PL444 17.00 dB
PL445 17.00 dB
PL446 17.00 dB
PL447 17.00 dB
PL448 17.00 dB
PL449 17.00 dB
PL450 17.00 dB
PL451 17.00 dB
PL452 17.00 dB
PL453 17.00 dB
PL454 17.00 dB
PL455 17.00 dB
PL456 17.00 dB
PL457 17.00 dB
PL458 17.00 dB
PL459 17.00 dB
PL460 17.00 dB
PL461 17.00 dB
PL462 17.00 dB
PL463 17.00 dB
PL464 17.00 dB
PL465 17.00 dB
PL466 17.00 dB
PL467 17.00 dB
PL468 17.00 dB
PL469 17.00 dB
PL470 17.00 dB
PL471 17.00 dB
PL472 17.00 dB
PL473 17.00 dB
PL474 17.00 dB
PL475 17.00 dB
PL476 17.00 dB
PL477 17.00 dB
PL478 17.00 dB
PL479 17.00 dB
PL480 17.00 dB
PL481 17.00 dB
PL482 17.00 dB
PL483 17.00 dB
PL484 17.00 dB
PL485 17.00 dB
PL486 17.00 dB
PL487 17.00 dB
PL488 17.00 dB
PL489 17.00 dB
PL490 17.00 dB
PL491 17.00 dB
PL492 17.00 dB
PL493 17.00 dB
PL494 17.00 dB
PL495 17.00 dB
PL496 17.00 dB
PL497 17.00 dB
PL498 17.00 dB
PL499 17.00 dB
PL500 17.00 dB
    
```

43.87  
43.12  
42.49  
31.53  
31.08  
30.76  
30.25  
19.17

77.42  
77.00  
76.57

138.66  
138.60  
136.96  
133.23  
131.48  
131.45  
128.76  
128.70  
128.51  
128.37  
128.26  
127.77  
127.68  
121.05  
121.00  
120.58  
120.44  
120.34  
120.19

195.91  
195.72

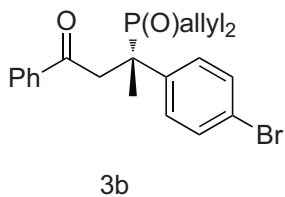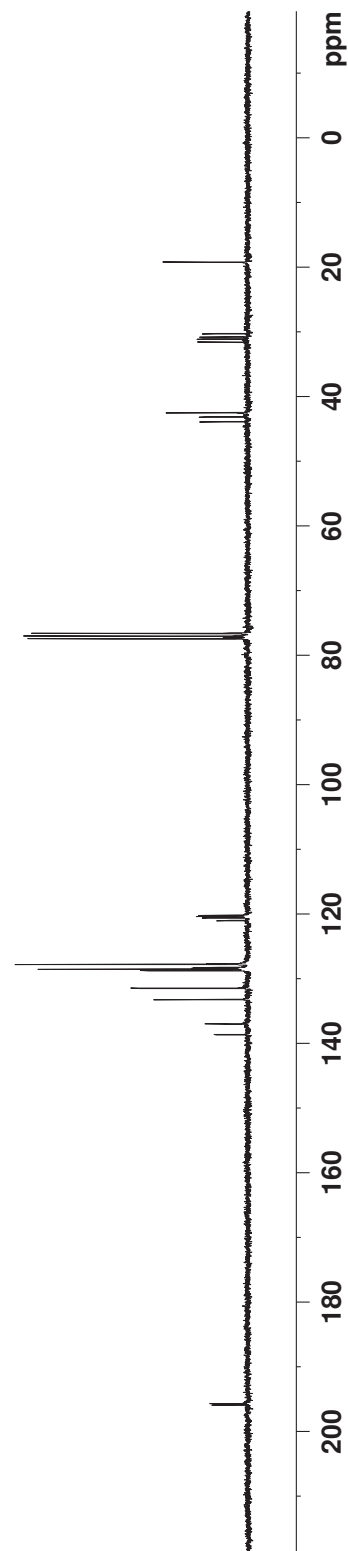

```

NAME          110112
EXPNO         8
PROCNO        1
Date_         20110112
Time_         11.52
INSTRUM       spect
PROBHD        5 mm PABBO BB-
PULPROG       zgpg30
TD            65536
SOLVENT       CDCl3
NS            16
DS            4
SWH           49019.609 Hz
FIDRES        0.747980 Hz
AQ            0.6685172 sec
RG            203
DW            10.200 usec
DE            6.50 usec
TE            286.0 K
D1            2.0000000 sec
D11           0.0300000 sec
TD0           1

===== CHANNEL f1 =====
NUC1          31P
P1            9.10 usec
PL1           0.00 dB
PL1W          36.92473221 W
SFO1          121.4887762 MHz

===== CHANNEL f2 =====
CPDPRG2       waltz16
NUC2          1H
PCPD2         80.00 usec
PL2           1.00 dB
PL12          17.00 dB
PL13          17.00 dB
PL12W         9.17820644 W
PL13W         0.23054613 W
SFO2          300.1312005 MHz
SI            32768
SF            121.4948510 MHz
WDW           EM
SSB           0
LB            1.00 Hz
GB            0
PC            1.40
    
```

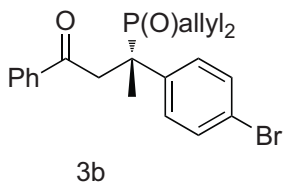

49.21

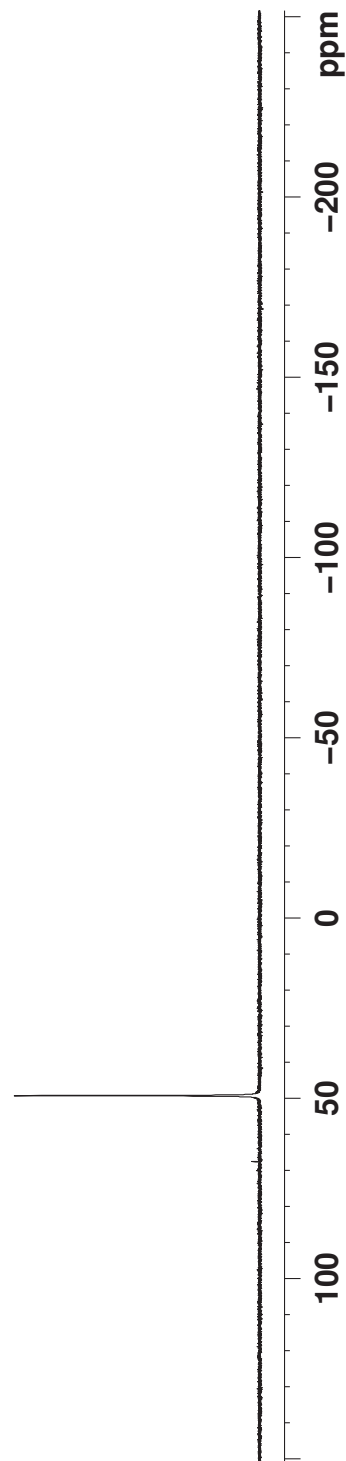

```

NAME      110112
EXPNO    1
PROCNO   1
Date_    20110112
Time     10.57
INSTRUM  spect
PROBHD   5 mm PABBO BB-
PULPROG  zg30
TD        65536
SOLVENT  CDCl3
NS        8
DS        2
SWH       6188.119 Hz
FIDRES    0.094423 Hz
AQ         5.2953587 sec
RG         36
DW         80.800 usec
DE         6.50 usec
TE        285.6 K
D1        1.00000000 sec
TD0       1

===== CHANNEL f1 =====
NUC1      1H
P1        11.80 usec
PL1       0.00 dB
PL1W      11.55467796 W
SFO1      300.1318534 MHz
SI        32768
SF        300.1299961 MHz
WDW       EM
SSB       0
LB        0.30 Hz
GB        0
PC        1.00
    
```

0.000

7.899  
7.875  
7.871  
7.875  
7.575  
7.557  
7.550  
7.544  
7.530  
7.526  
7.522  
7.452  
7.442  
7.427  
7.420  
7.413  
7.403  
7.316  
7.288  
7.280  
6.045  
6.029  
6.021  
6.005  
5.659  
5.644  
5.634  
5.620  
5.611  
5.602  
5.587  
4.442  
4.414  
4.382  
4.354  
3.592  
3.577  
3.571  
3.531  
3.517  
2.756  
2.714  
2.294  
2.269  
2.254  
2.250  
2.244  
2.225  
2.221  
1.878  
1.823

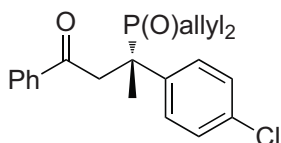

3c

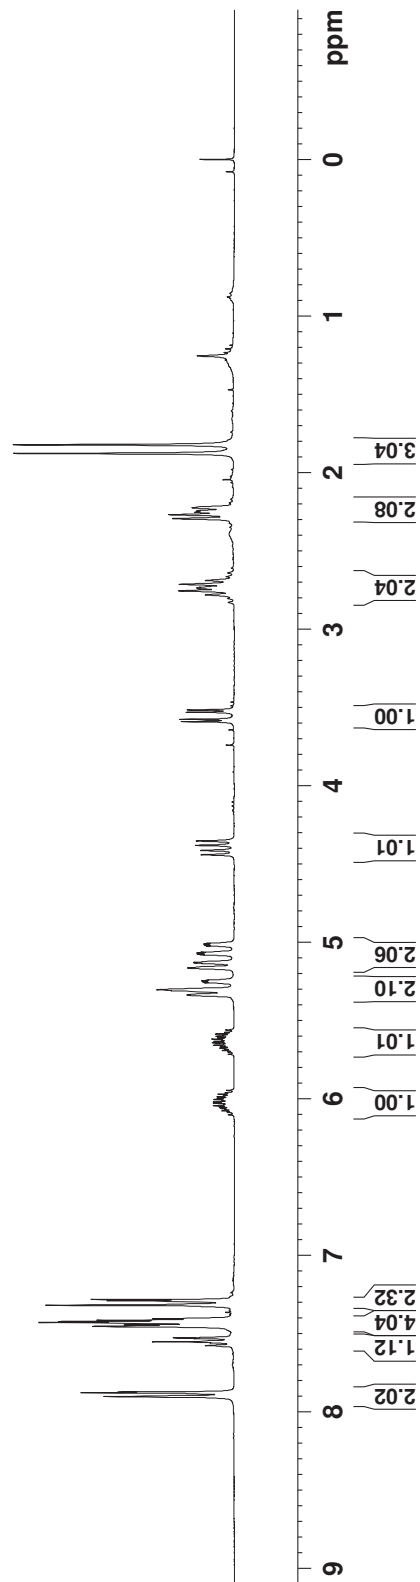



```

NAME          110112
EXPNO         3
PROCNO        1
Date_         20110112
Time_         11.18
INSTRUM       spect
PROBHD        5 mm PABBO BB-
PULPROG       zgpg30
TD            65536
SOLVENT       CDCl3
NS            16
DS            4
SWH           49019.609 Hz
FIDRES        0.747980 Hz
AQ            0.6685172 sec
RG            203
DW            10.200 usec
DE            6.50 usec
TE            286.3 K
D1            2.0000000 sec
D11           0.0300000 sec
TD0           1

===== CHANNEL f1 =====
NUC1          31P
P1            9.10 usec
PL1           0.00 dB
PL1W          36.92473221 W
SFO1          121.4887762 MHz

===== CHANNEL f2 =====
CPDPRG2      waltz16
NUC2          1H
PCPD2        80.00 usec
PL2           1.00 dB
PL12         17.00 dB
PL13         17.00 dB
PL12W        9.17820644 W
PL13W        0.23054613 W
SFO2         300.1312005 MHz
SI           32768
SF           121.4948510 MHz
WDW          EM
SSB          0
LB           1.00 Hz
GB           0
PC           1.40
    
```

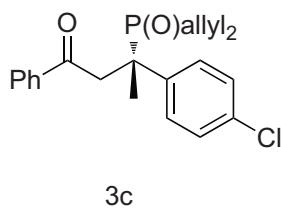

49.34

100 50 0 -50 -100 -150 -200 ppm

```

NAME      110113
EXPNO     1
PROCNO    1
Date_     20110113
Time      19.32
INSTRUM   spect
PROBHD    5 mm PABBO BB-
PULPROG   zg30
TD         65536
SOLVENT   CDCl3
NS         2
DS         8
SWH        6188.119 Hz
FIDRES     0.094423 Hz
AQ         5.2953587 sec
RG         36
DW         80.800 usec
DE         6.50 usec
TE         285.8 K
D1         1.00000000 sec
D11        1
D10        1

===== CHANNEL f1 =====
NUC1       1H
P1         11.80 usec
PL1        0.00 dB
PL12       11.55467796 W
SFO1       300.1318534 MHz
SI         32768
SF         300.1299968 MHz
WDW        EM
SSB        0
LB         0.30 Hz
GB         0
FC         1.00
    
```

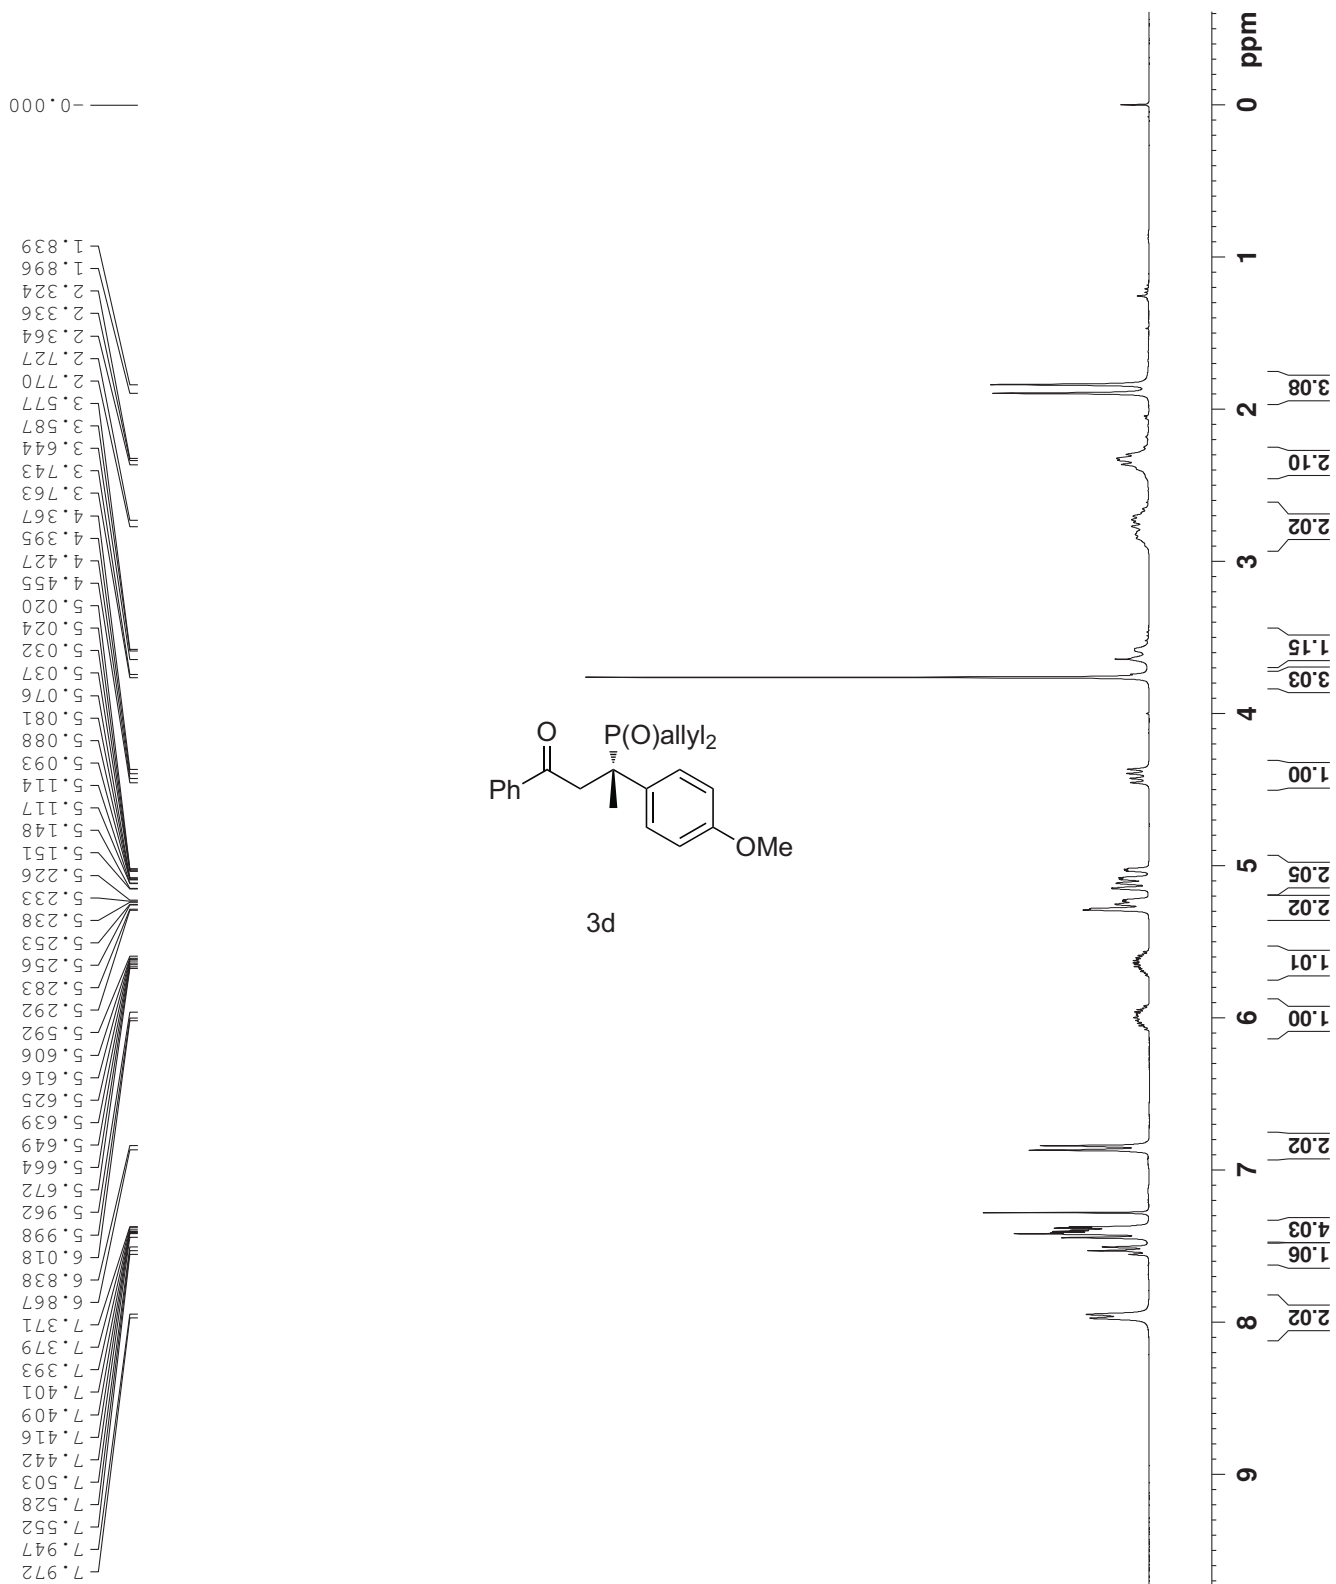



```
NAME 110113
EXPNO 4
PROCNO 1
Date_ 20110113
Time 19.45
INSTRUM spect
PROBHD 5 mm PABBO BB-
PULPROG zgpg30
TD 65536
SOLVENT CDC13
NS 461
DS 4
SWH 18028.846 Hz
FIDRES 0.275098 Hz
AQ 1.8175818 sec
RG 203
DW 27.733 usec
DE 6.50 usec
TE 286.6 K
D1 2.00000000 sec
D11 0.03000000 sec
TD0 1

===== CHANNEL f1 =====
NUC1 13C
P1 9.70 usec
PL1 0.00 dB
PL1W 29.38907051 W
SF01 75.4752953 MHz

===== CHANNEL f2 =====
CPDPRG2 waltz16
NUC2 1H
PCPD2 80.00 usec
PL2 1.00 dB
PL12 17.00 dB
PL13 17.00 dB
PL1W 9.17820644 W
PL2W 0.23054813 W
PL13W 0.23054813 W
SF02 300.1312005 MHz
SI 32768
SF 75.4677569 MHz
WDW EM
SSB 0
LB 1.00 Hz
GB 0
PC 1.40
```

196.23  
196.04  
158.33  
158.29  
137.18  
133.08  
130.71  
128.46  
128.14  
128.08  
127.96  
120.64  
120.50  
120.25  
113.86  
113.83  
77.42  
77.00  
76.58  
55.05  
43.50  
42.73  
42.39  
31.18  
30.75  
30.41  
29.90  
19.24

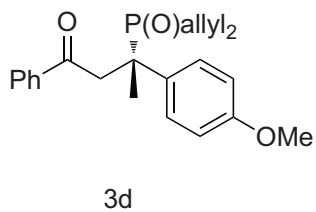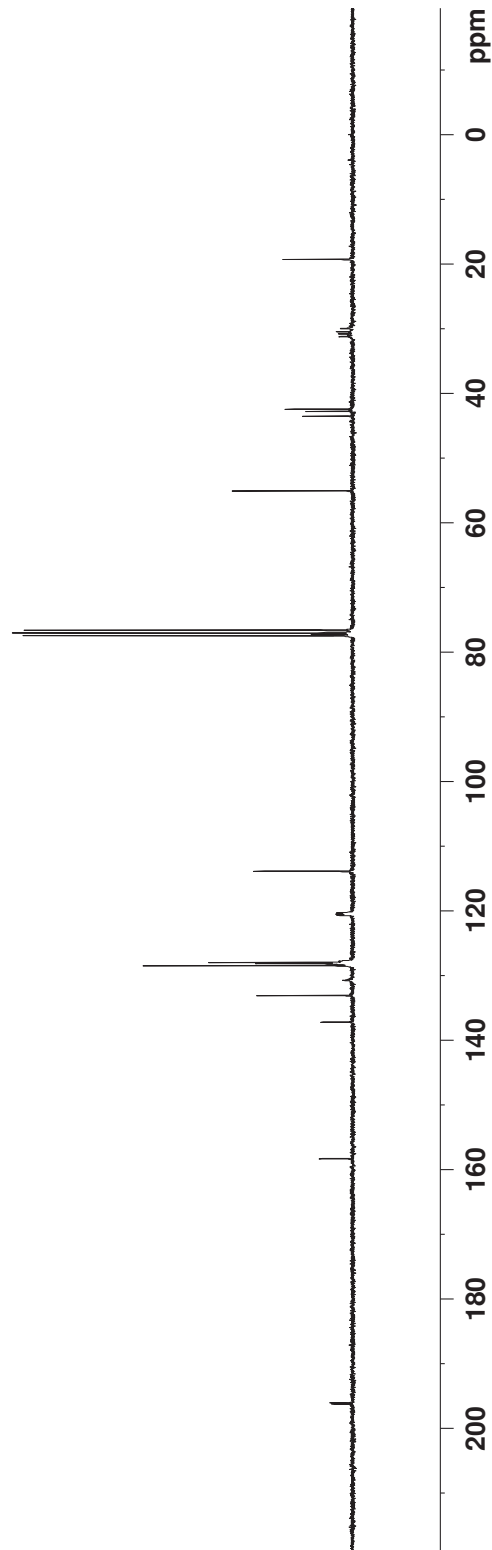

```
NAME 110113
EXPNO 2
PROCNO 1
Date_ 20110113
Time_ 19.29
INSTRUM spect
PROBHD 5 mm PABBO BB-
PULPROG zgpg30
TD 65536
SOLVENT CDCl3
NS 16
DS 4
SWH 49019.609 Hz
FIDRES 0.747980 Hz
AQ 0.6685172 sec
RG 203
DW 10.200 usec
DE 6.50 usec
TE 285.9 K
D1 2.0000000 sec
D11 0.0300000 sec
TDO 1

===== CHANNEL f1 =====
NUC1 31P
P1 9.10 usec
PL1 0.00 dB
PL1W 36.92473221 W
SFO1 121.4887762 MHz

===== CHANNEL f2 =====
CPDPRG2 waltz16
NUC2 1H
PCPD2 80.00 usec
PL2 1.00 dB
PL12 17.00 dB
PL13 17.00 dB
PL12W 9.17820644 W
PL13W 0.23054613 W
SFO2 300.1312005 MHz
SI 32768
SF 121.4948510 MHz
WDM EM
SSB 0
LB 1.00 Hz
GB 0
PC 1.40
```

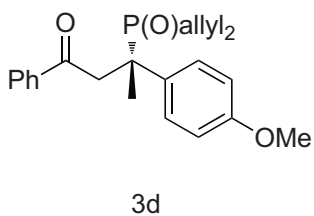

50.59

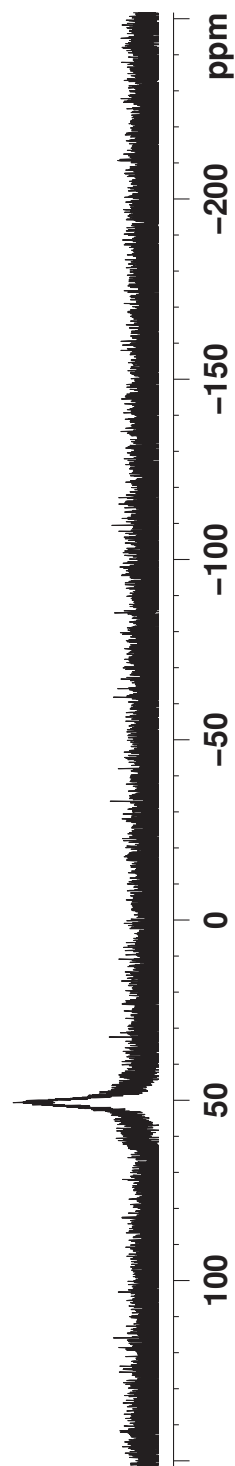

```

NAME      110112
EXPNO     9
PROCNO    1
Date_     20110112
Time      11.58
INSTRUM   spect
PROBHD    5 mm PABBO BB-
PULPROG   zg30
TD         65536
SOLVENT   CDCl3
NS         8
DS         2
SWH        6188.119 Hz
FIDRES     0.094423 Hz
AQ         5.2953587 sec
RG         32
DW         80.800 usec
DE         6.50 usec
TE         285.8 K
D1         1.00000000 sec
TD0        1

===== CHANNEL f1 =====
NUC1       1H
P1         11.80 usec
PL1        0.00 dB
PL12       11.55467796 W
SFO1       300.1318534 MHz
SI         32768
SF         300.1299974 MHz
WDW        EM
SSB        0
LB         0.30 Hz
GB         0
FC         1.00
    
```

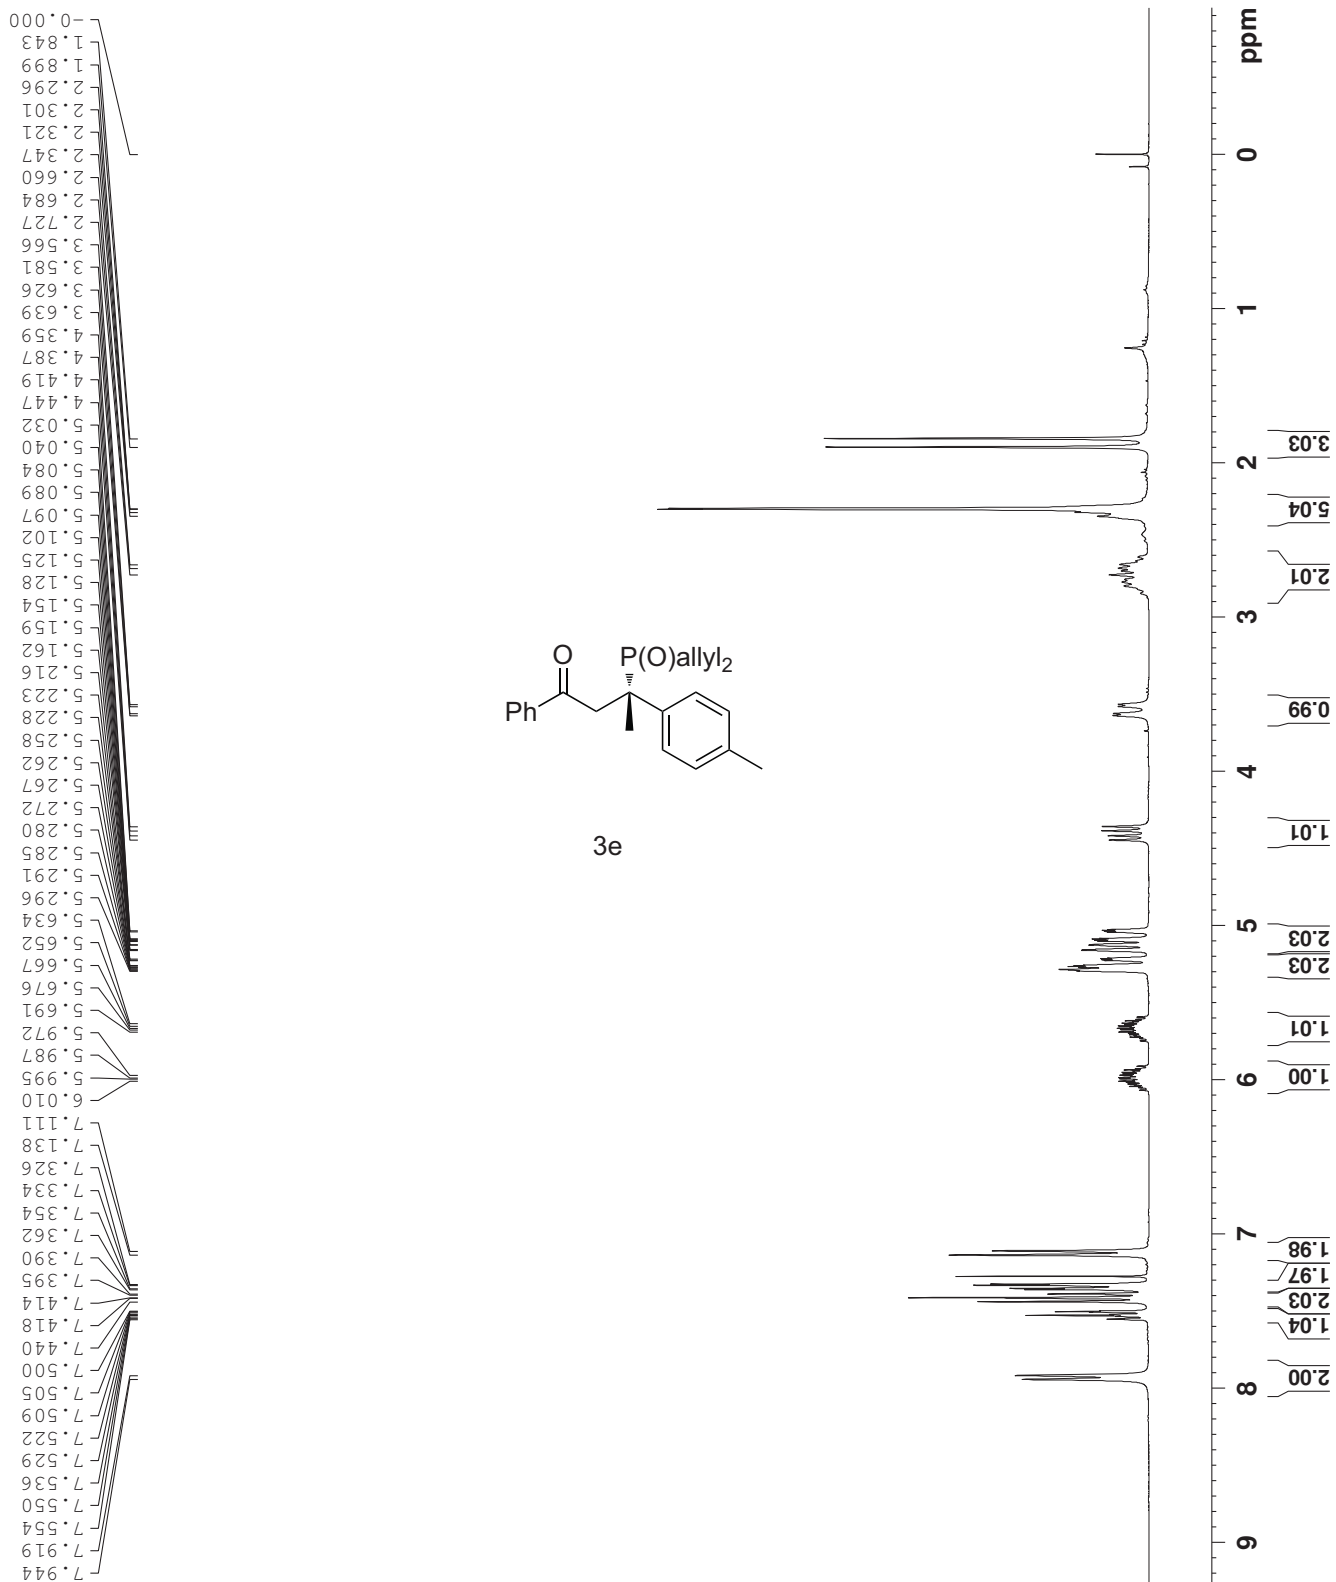

```

NAME                110112
EXPNO                10
PROCNO               1
Date_                20110112
Time                12.06
INSTRUM              spect
PROBHD               5 mm PABBO BB-
PULPROG              zgpg30
TD                   65536
SOLVENT              CDCl3
NS                   332
DS                   4
SWH                  18028.846 Hz
FIDRES               0.275098 Hz
AQ                   1.8175818 sec
RG                   203
DW                   27.733 usec
DE                   6.50 usec
TE                   286.4 K
D1                   2.00000000 sec
D11                  0.03000000 sec
TD0                  1

===== CHANNEL f1 =====
NUC1                  13C
P1                    9.70 usec
PL1                   0.00 dB
PL1W                  29.38907051 W
SF01                  75.4752953 MHz

===== CHANNEL f2 =====
CPDPRG2              waltz16
NUC2                  1H
PCPD2                80.00 usec
PL2                   1.00 dB
PL12                  17.00 dB
PL13                  17.00 dB
PL14                  17.00 dB
PL15                  17.00 dB
PL16                  17.00 dB
PL17                  17.00 dB
PL18                  17.00 dB
PL19                  17.00 dB
PL20                  17.00 dB
PL21                  17.00 dB
PL22                  17.00 dB
PL23                  17.00 dB
PL24                  17.00 dB
PL25                  17.00 dB
PL26                  17.00 dB
PL27                  17.00 dB
PL28                  17.00 dB
PL29                  17.00 dB
PL30                  17.00 dB
PL31                  17.00 dB
PL32                  17.00 dB
PL33                  17.00 dB
PL34                  17.00 dB
PL35                  17.00 dB
PL36                  17.00 dB
PL37                  17.00 dB
PL38                  17.00 dB
PL39                  17.00 dB
PL40                  17.00 dB
PL41                  17.00 dB
PL42                  17.00 dB
PL43                  17.00 dB
PL44                  17.00 dB
PL45                  17.00 dB
PL46                  17.00 dB
PL47                  17.00 dB
PL48                  17.00 dB
PL49                  17.00 dB
PL50                  17.00 dB
PL51                  17.00 dB
PL52                  17.00 dB
PL53                  17.00 dB
PL54                  17.00 dB
PL55                  17.00 dB
PL56                  17.00 dB
PL57                  17.00 dB
PL58                  17.00 dB
PL59                  17.00 dB
PL60                  17.00 dB
PL61                  17.00 dB
PL62                  17.00 dB
PL63                  17.00 dB
PL64                  17.00 dB
PL65                  17.00 dB
PL66                  17.00 dB
PL67                  17.00 dB
PL68                  17.00 dB
PL69                  17.00 dB
PL70                  17.00 dB
PL71                  17.00 dB
PL72                  17.00 dB
PL73                  17.00 dB
PL74                  17.00 dB
PL75                  17.00 dB
PL76                  17.00 dB
PL77                  17.00 dB
PL78                  17.00 dB
PL79                  17.00 dB
PL80                  17.00 dB
PL81                  17.00 dB
PL82                  17.00 dB
PL83                  17.00 dB
PL84                  17.00 dB
PL85                  17.00 dB
PL86                  17.00 dB
PL87                  17.00 dB
PL88                  17.00 dB
PL89                  17.00 dB
PL90                  17.00 dB
PL91                  17.00 dB
PL92                  17.00 dB
PL93                  17.00 dB
PL94                  17.00 dB
PL95                  17.00 dB
PL96                  17.00 dB
PL97                  17.00 dB
PL98                  17.00 dB
PL99                  17.00 dB
PL100                 17.00 dB
SF02                  300.1312005 MHz
SI                    32768
SF                    75.4677582 MHz
WDW                   EM
SSB                    0
LB                    1.00 Hz
GB                    0
PC                    1.40
    
```

43.88  
43.12  
42.33  
31.26  
30.93  
30.49  
30.10  
20.87  
19.19

77.42  
77.00  
76.58

137.20  
137.17  
136.43  
136.39  
136.02  
133.03  
129.23  
129.19  
128.43  
128.09  
127.88  
126.81  
126.74  
120.42  
120.27  
120.17  
120.02

196.17  
195.98

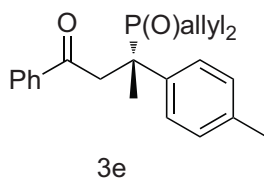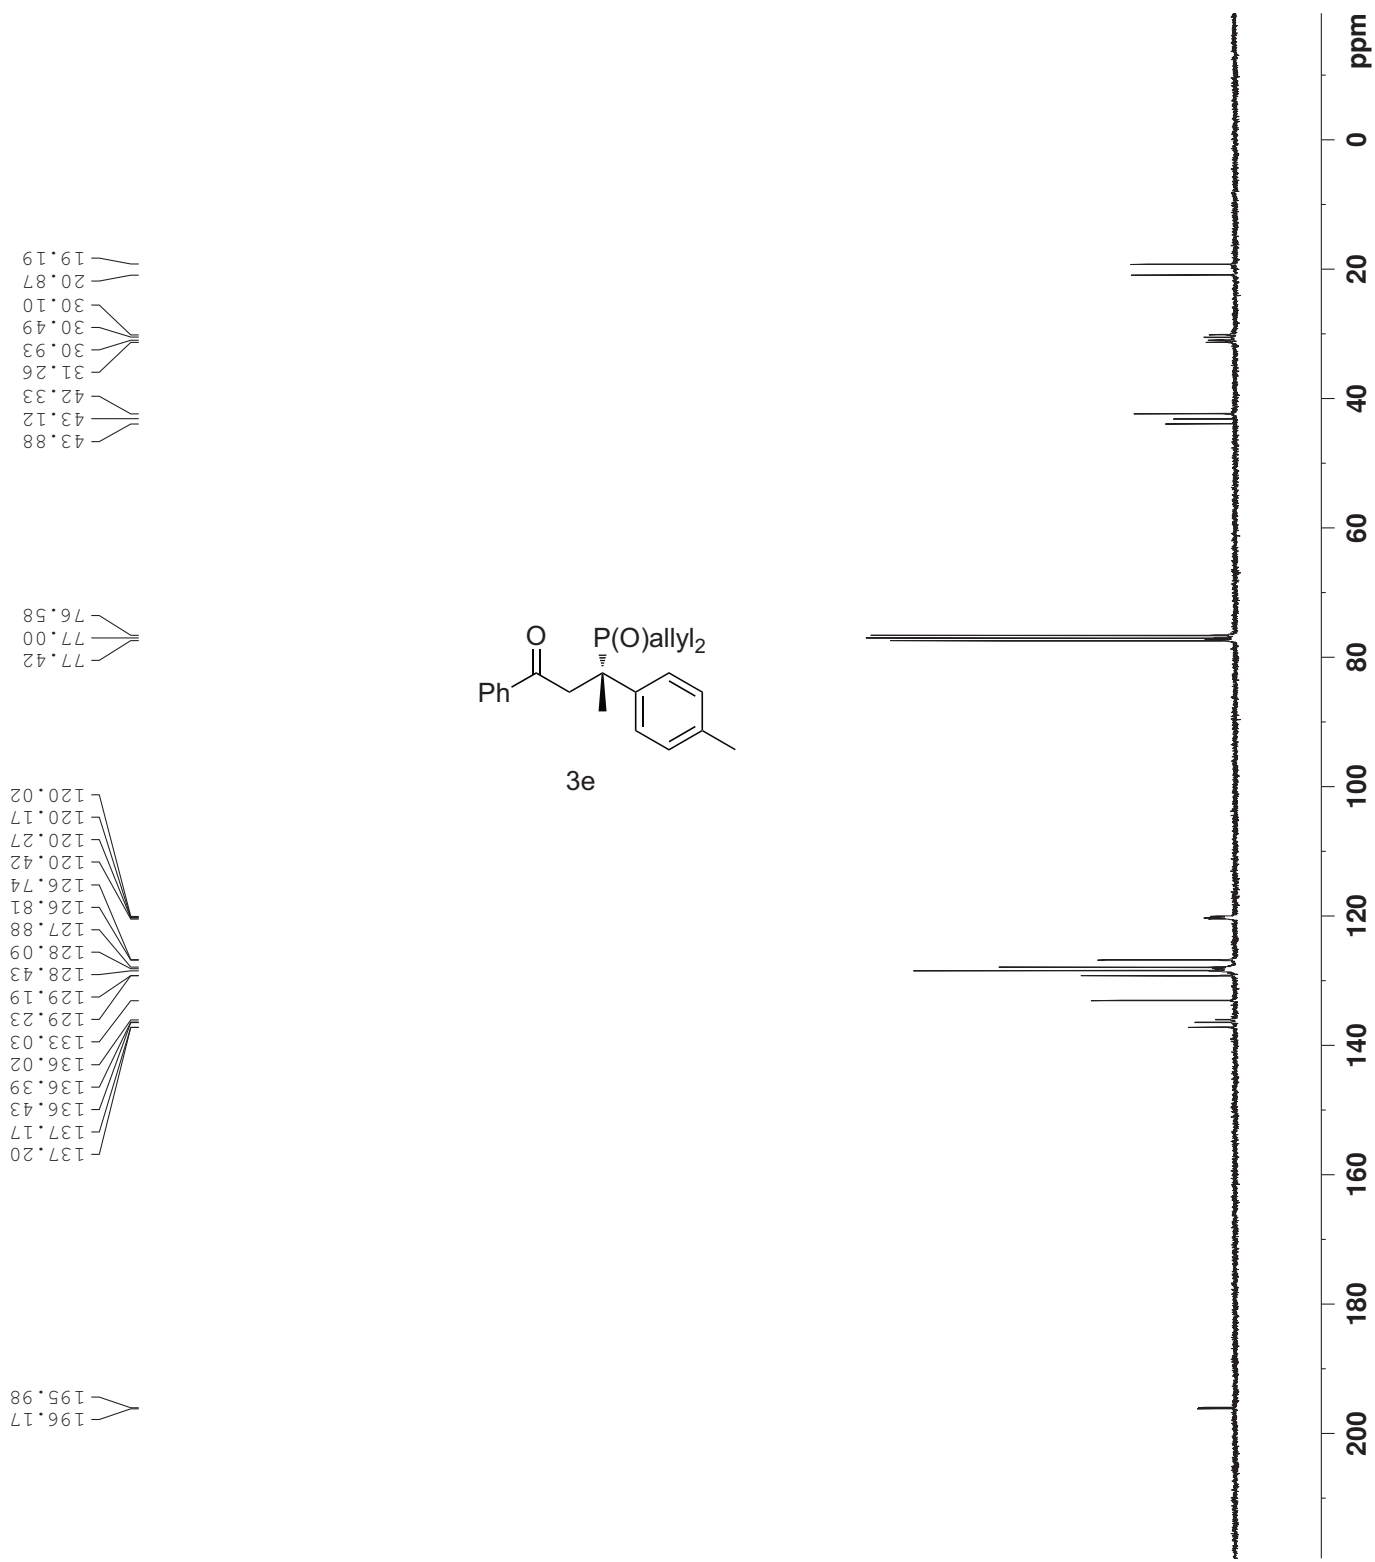

```
NAME 110112
EXPNO 12
PROCNO 1
Date_ 20110112
Time_ 12.34
INSTRUM spect
PROBHD 5 mm PABBO BB-
PULPROG zgpg30
TD 65536
SOLVENT CDCl3
NS 16
DS 4
SWH 49019.609 Hz
FIDRES 0.747980 Hz
AQ 0.6685172 sec
RG 203
DW 10.200 usec
DE 6.50 usec
TE 286.0 K
D1 2.0000000 sec
D11 0.0300000 sec
TDO 1

===== CHANNEL f1 =====
NUC1 31P
P1 9.10 usec
PL1 0.00 dB
PL1W 36.92473221 W
SFO1 121.4887762 MHz

===== CHANNEL f2 =====
CPDPRG2 waltz16
NUC2 1H
PCPD2 80.00 usec
PL2 1.00 dB
PL12 17.00 dB
PL13 17.00 dB
PL12W 9.17820644 W
PL13W 0.23054613 W
SFO2 300.1312005 MHz
SI 32768
SF 121.4948510 MHz
WDMW EM
SSB 0
LB 1.00 Hz
GB 0
PC 1.40
```

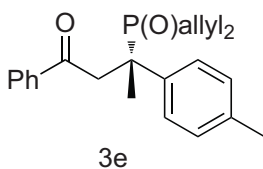

50.04

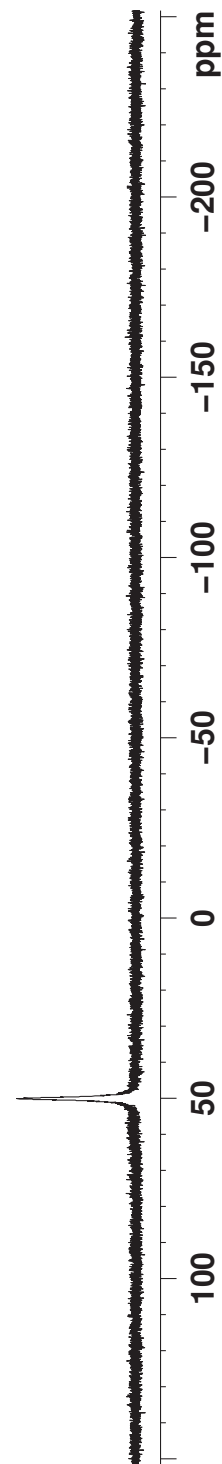

```

NAME      110115
EXPNO    2
PROCNO   1
Date_    20110115
Time     15.41
INSTRUM  spect
PROBHD   5 mm PABBO BB-
PULPROG  zg30
TD        65536
SOLVENT  CDCl3
NS        8
DS        2
SWH       6188.119 Hz
FIDRES   0.094423 Hz
AQ        5.2953587 sec
RG        28.5
DW        80.800 usec
DE        6.50 usec
TE        300.0 K
D1        1.00000000 sec
TD0       1

===== CHANNEL f1 =====
NUC1      1H
P1        11.80 usec
PL1       0.00 dB
PL1W      11.55467796 W
SFO1      300.1318534 MHz
SI        32768
SF        300.1299908 MHz
WDW       EM
SSB       0
LB        0.30 Hz
GB        0
PC        1.00
    
```

0.000

1.822  
1.773

2.562  
2.565  
2.603  
2.628  
2.664

3.637  
3.655  
3.693  
3.711  
3.926  
3.950  
3.982  
4.006

5.130  
5.135  
5.142  
5.147  
5.199  
5.236  
5.245  
5.250  
5.256  
5.270

5.773  
5.789  
5.799  
5.816  
6.217  
6.229  
6.240  
6.373  
6.379  
6.389

7.298  
7.354  
7.407  
7.431  
7.457  
7.524  
7.548  
7.573  
7.902  
7.906  
7.930

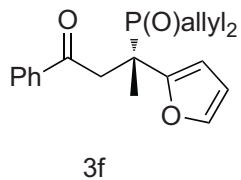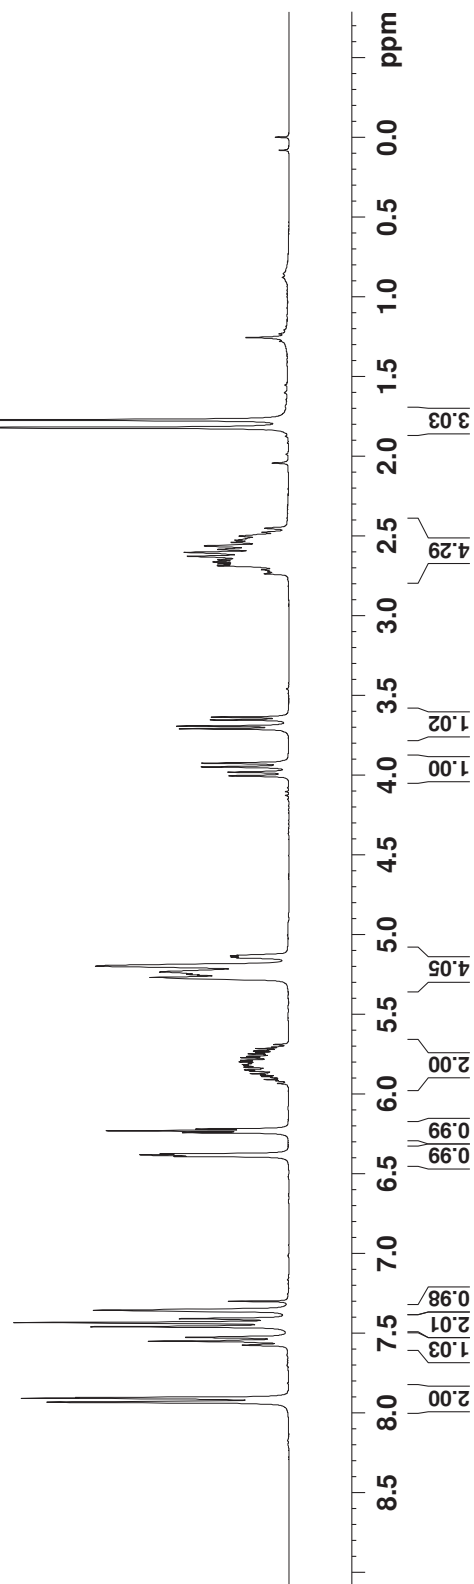

```
NAME 110115
EXPNO 3
PROCNO 1
Date_ 20110115
Time 16.26
INSTRUM spect
PROBHD 5 mm PABBO BB-
PULPROG zgpg30
TD 65536
SOLVENT CDC13
NS 515
DS 4
SWH 18028.846 Hz
FIDRES 0.275098 Hz
AQ 1.8175818 sec
RG 203
DW 27.733 usec
DE 6.50 usec
TE 300.0 K
D1 2.00000000 sec
D11 0.03000000 sec
TD0 1

===== CHANNEL f1 =====
NUC1 13C
P1 9.70 usec
PL1 0.00 dB
PL1W 29.38907051 W
SF01 75.4752953 MHz

===== CHANNEL f2 =====
CPDPRG2 waltz16
NUC2 1H
PCPD2 80.00 usec
PL2 1.00 dB
PL2W 17.00 dB
PL13 17.00 dB
PL12W 9.17820644 W
PL12W 0.23054813 W
PL13W 0.23054813 W
SF02 300.1312005 MHz
SI 32768
SF 75.4677590 MHz
WDW EM
SSB 0
LB 1.00 Hz
GB 0
PC 1.40
```

41.91  
41.12  
39.72  
31.92  
31.13  
30.83  
30.02  
17.32  
17.29

77.42  
77.00  
76.58

153.38  
153.31  
141.47  
141.43  
137.06  
137.03  
133.08  
128.42  
128.13  
128.01  
127.88  
127.76  
120.41  
120.29  
120.27  
120.15  
111.11  
111.07  
107.75  
107.65

196.27  
196.09

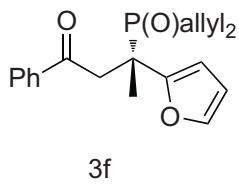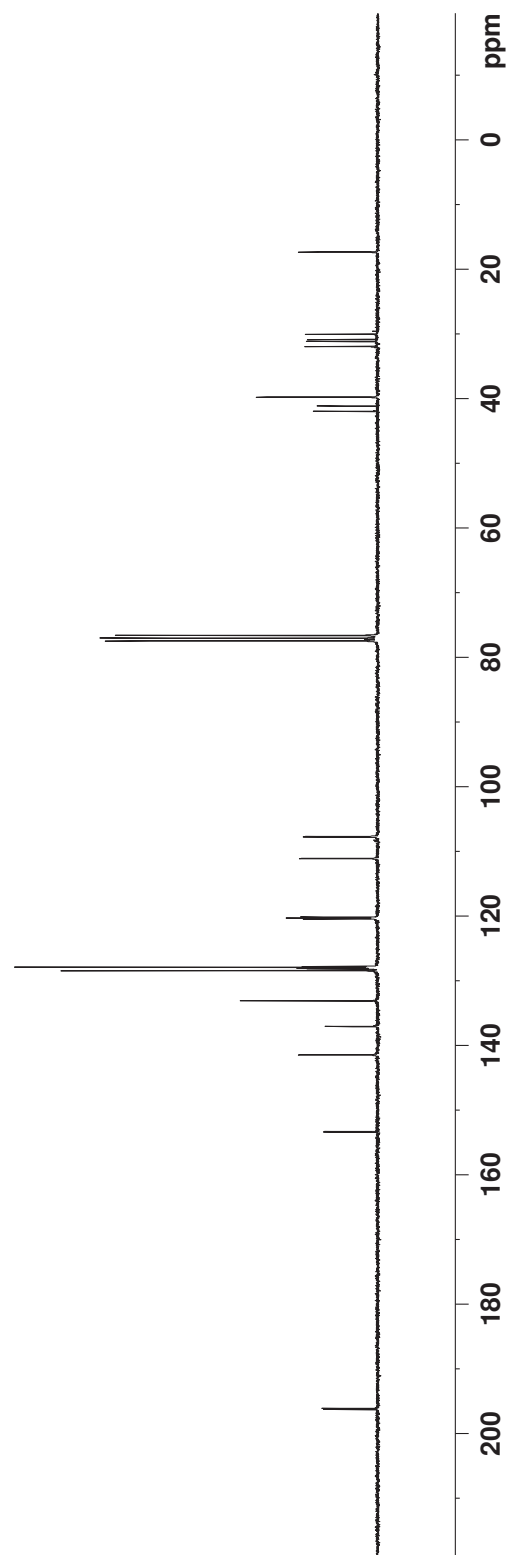

```

NAME          110115
EXPNO         1
PROCNO        1
Date_         20110115
Time_         15.38
INSTRUM       spect
PROBHD        5 mm PABBO BB-
PULPROG       zgpg30
TD            65536
SOLVENT       CDCl3
NS            16
DS            4
SWH           49019.609 Hz
FIDRES        0.747980 Hz
AQ            0.6685172 sec
RG            203
DW            10.200 usec
DE            6.50 usec
TE            300.0 K
D1            2.0000000 sec
D11           0.0300000 sec
TD0           1

===== CHANNEL f1 =====
NUC1          31P
P1            9.10 usec
PL1           0.00 dB
PL1W          36.92473221 W
SFO1          121.4887762 MHz

===== CHANNEL f2 =====
CPDPRG2       waltz16
NUC2          1H
PCPD2         80.00 usec
PL2           1.00 dB
PL12          17.00 dB
PL13          17.00 dB
PL12W         9.17820644 W
PL13W         0.23054613 W
SFO2          300.1312005 MHz
SI            32768
SF            121.4948510 MHz
WDM           EM
SSB           0
LB            1.00 Hz
GB            0
PC            1.40
    
```

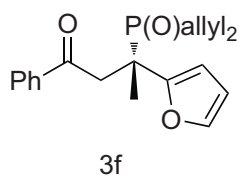

49.43

100 50 0 -50 -100 -150 -200 ppm



```

NAME      110223
EXPNO    5
PROCNO   1
Date_    20110223
Time     14.08
INSTRUM spect
PROBHD   5 mm F4BBO
PULPROG zg30
TD       65536
SOLVENT  CDCl3
NS       2
DS       8
SWH      6188.113 Hz
FIDRES   0.094423 Hz
AQ       5.2355537 sec
RG       32
DW       80.800 usec
DE       6.50 usec
TE       287.1 K
D1       1.00000000 sec
ID0      1

===== CHANNEL f1 =====
NUC1      1H
P1        11.80 usec
PL1       0.00 dB
PL12      11.55467796 W
SF01      300.1318534 MHz
SI        32768
SF        300.1300031 MHz
WDW       EM
SSB       0
LB        0.30 Hz
GB        0
PC        1.00
    
```

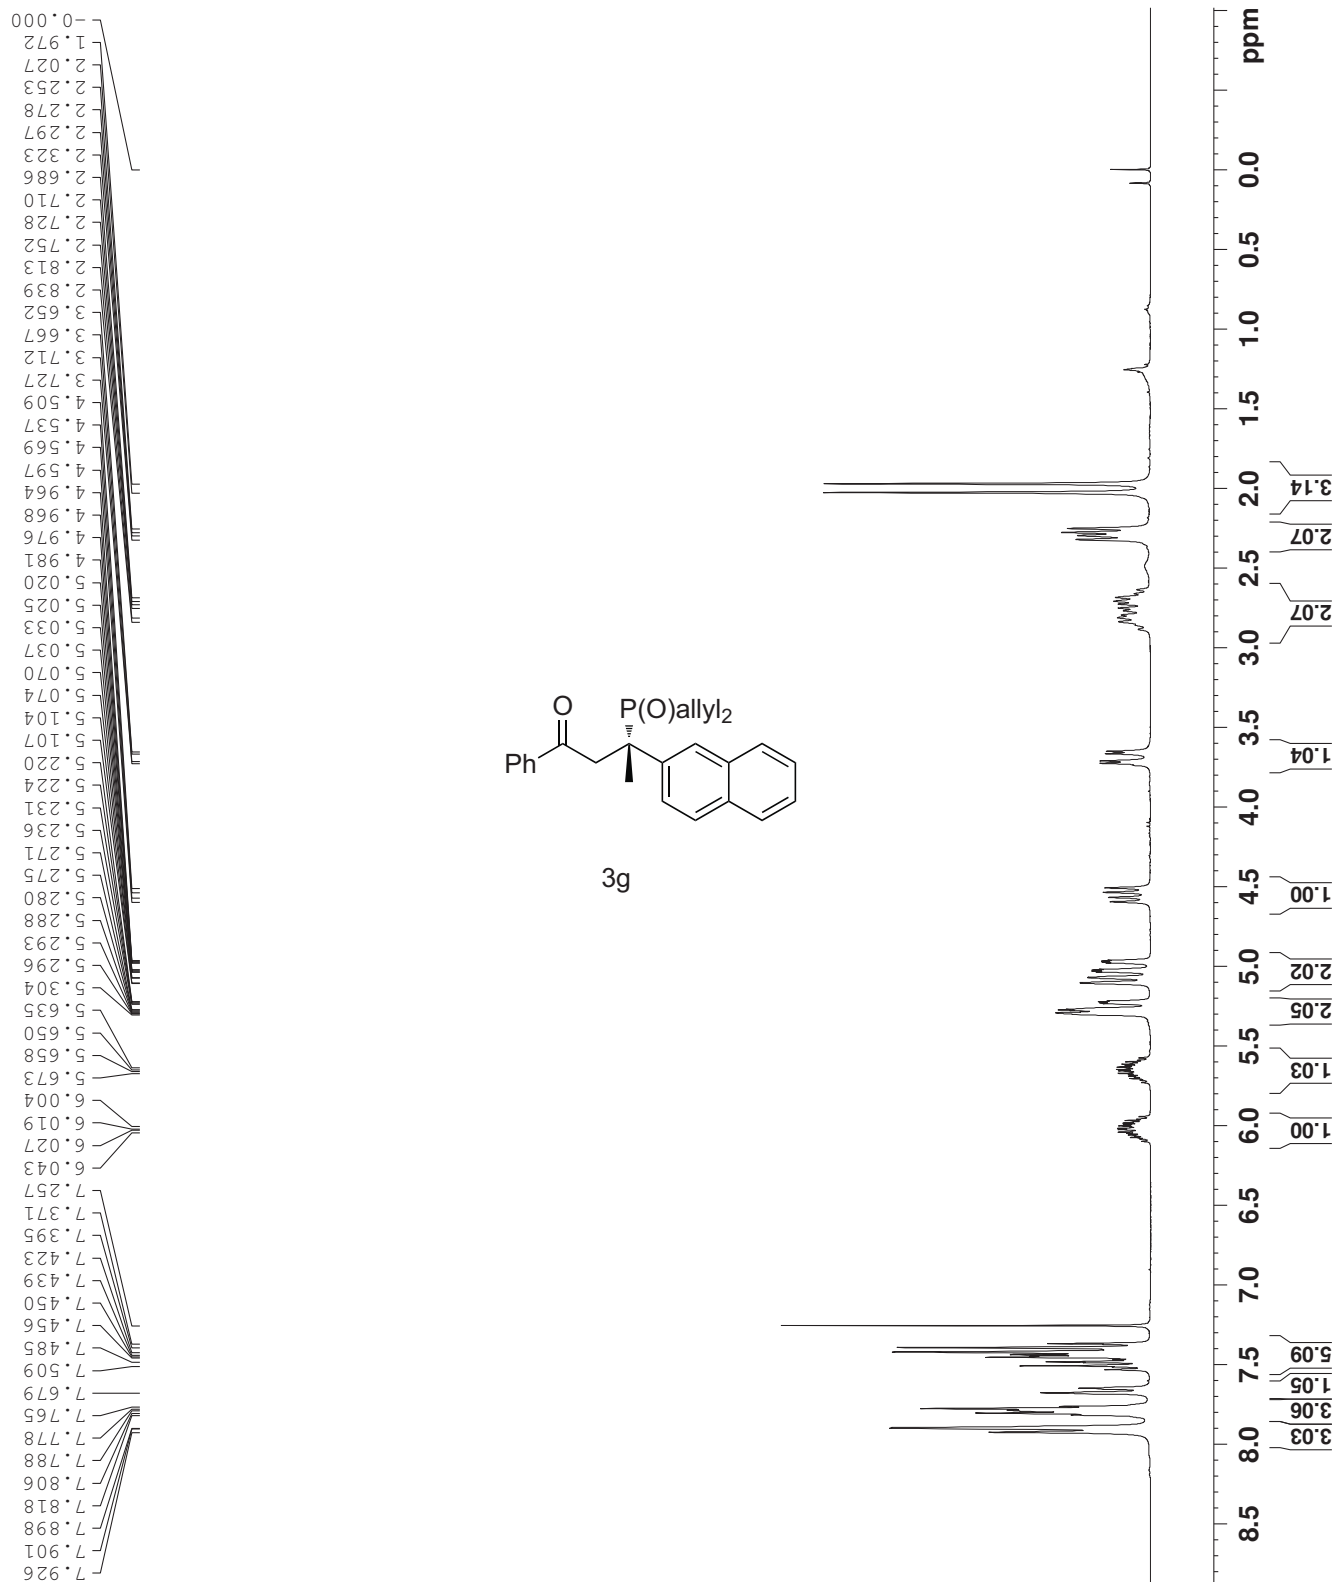

```

NAME 110223
EXPNO 6
PROCNO 1
Date_ 20110223
Time 14.14
INSTRUM spect
PROBHD 5 mm PABBO BB-
PULPROG zgpg30
TD 65536
SOLVENT CDC13
NS 622
DS 4
SWH 18028.846 Hz
FIDRES 0.275098 Hz
AQ 1.8175818 sec
RG 203
DW 27.733 usec
DE 6.50 usec
TE 287.4 K
D1 2.00000000 sec
D11 0.03000000 sec
TD0 1

===== CHANNEL f1 =====
NUC1 13C
P1 9.70 usec
PL1 0.00 dB
PL1W 29.38907051 W
SF01 75.4752953 MHz

===== CHANNEL f2 =====
CPDPRG2 waltz16
NUC2 1H
PCPD2 80.00 usec
PL2 1.00 dB
PL12 17.00 dB
PL13 17.00 dB
PL1W 9.17820644 W
PL12W 0.23054813 W
PL13W 0.23054813 W
SF02 300.1312005 MHz
SI 32768
SF 75.4677592 MHz
WDW EM
SSB 0
LB 1.00 Hz
GB 0
PC 1.40
    
```

44.47  
43.72  
42.56  
31.44  
31.17  
30.67  
30.35  
19.40

77.42  
77.00  
76.58

137.16  
137.13  
136.92  
133.08  
133.03  
132.04  
132.01  
128.45  
128.36  
128.07  
127.86  
127.35  
126.07  
126.02  
125.92  
125.00  
124.95  
120.50  
120.36  
120.20  
120.06

196.10  
195.92

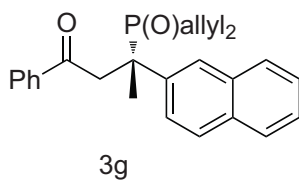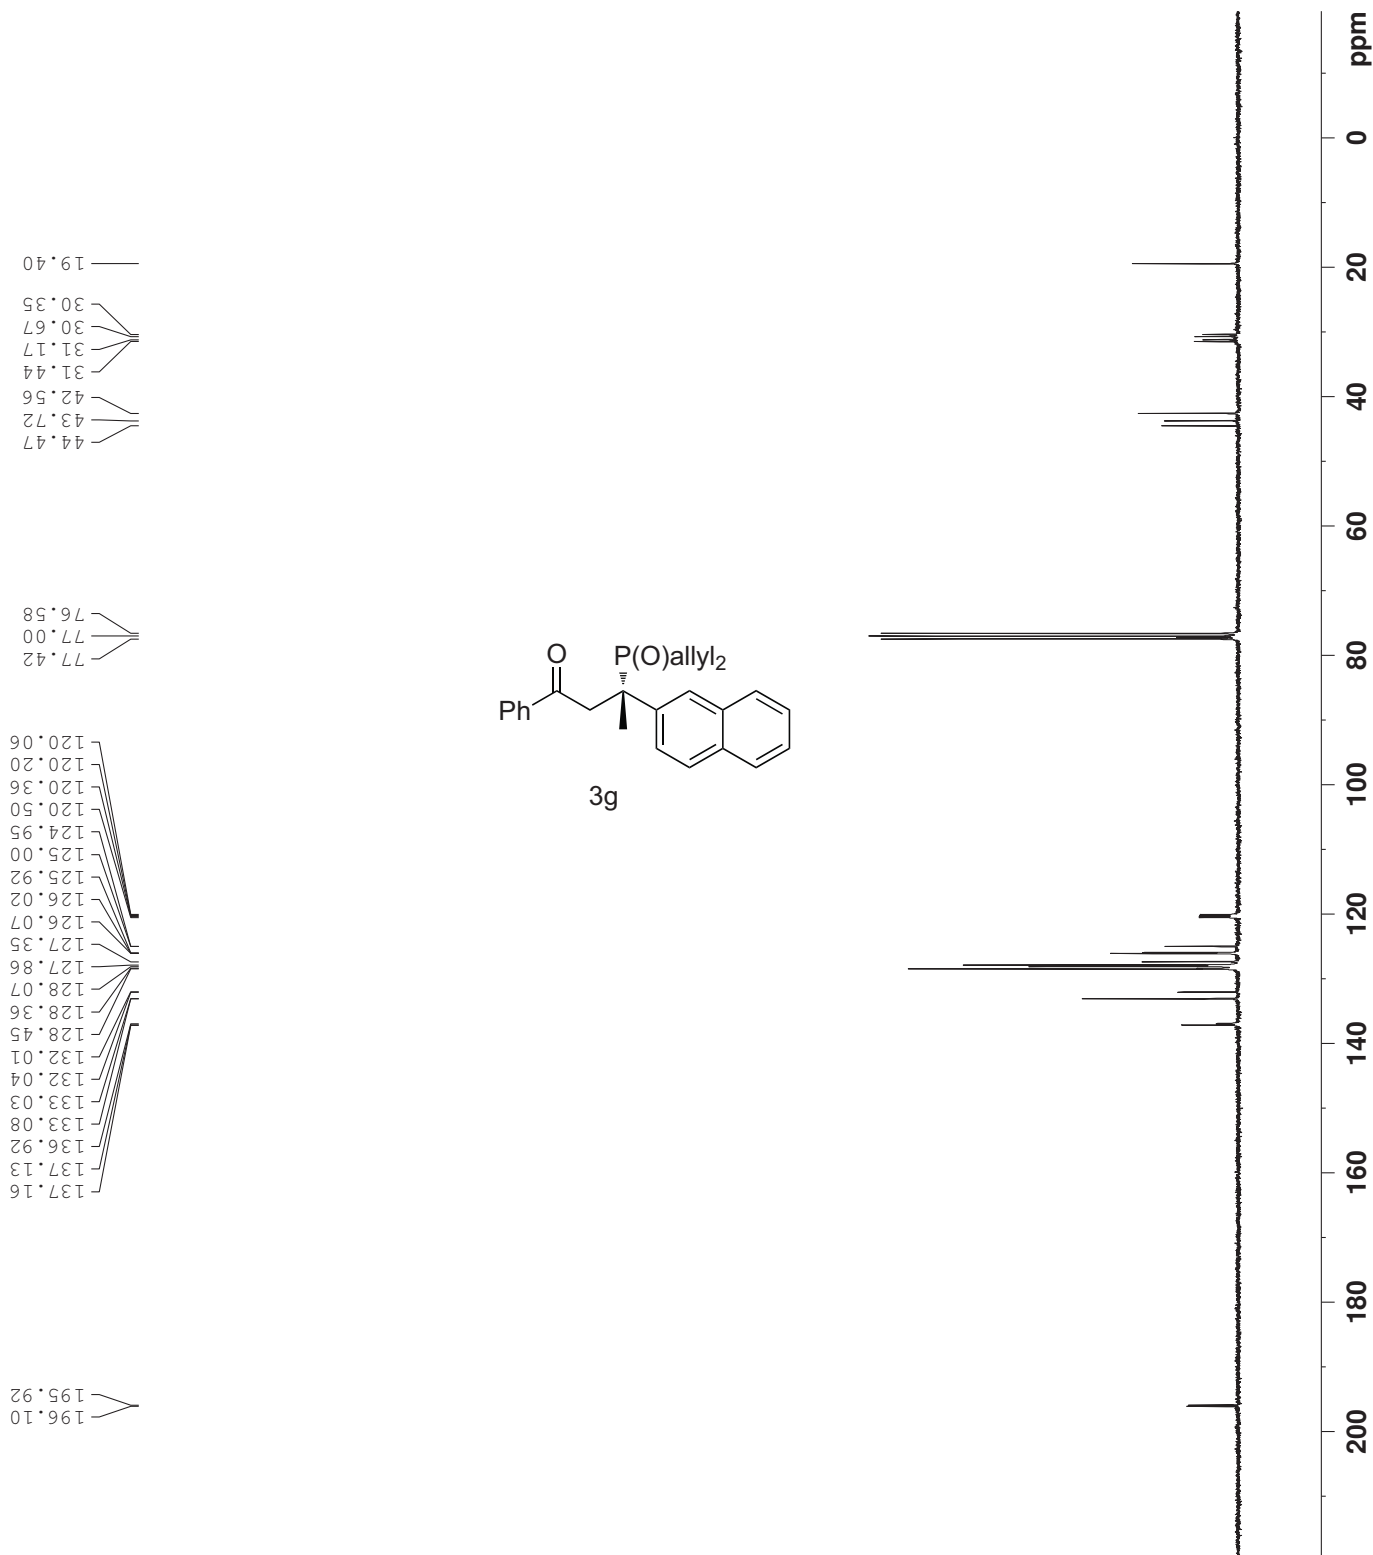

```
NAME 110223
EXPNO 4
PROCNO 1
Date_ 20110223
Time_ 14.05
INSTRUM spect
PROBHD 5 mm PABBO BB-
PULPROG zgpg30
TD 65536
SOLVENT CDCl3
NS 16
DS 4
SWH 49019.609 Hz
FIDRES 0.747980 Hz
AQ 0.6685172 sec
RG 203
DW 10.200 usec
DE 6.50 usec
TE 286.9 K
D1 2.0000000 sec
D11 0.0300000 sec
TDO 1

===== CHANNEL f1 =====
NUC1 31P
P1 9.10 usec
PL1 0.00 dB
PL1W 36.92473221 W
SFO1 121.4887762 MHz

===== CHANNEL f2 =====
CEDPRG2 waltz16
NUC2 1H
PCPD2 80.00 usec
PL2 1.00 dB
PL12 17.00 dB
PL13 17.00 dB
PL12W 9.17820644 W
PL13W 0.23054613 W
SFO2 300.1312005 MHz
SI 32768
SF 121.4948510 MHz
WDM EM
SSB 0
LB 1.00 Hz
GB 0
PC 1.40
```

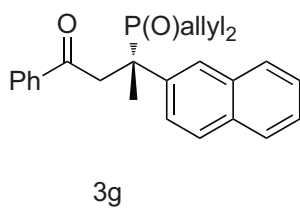

50.04

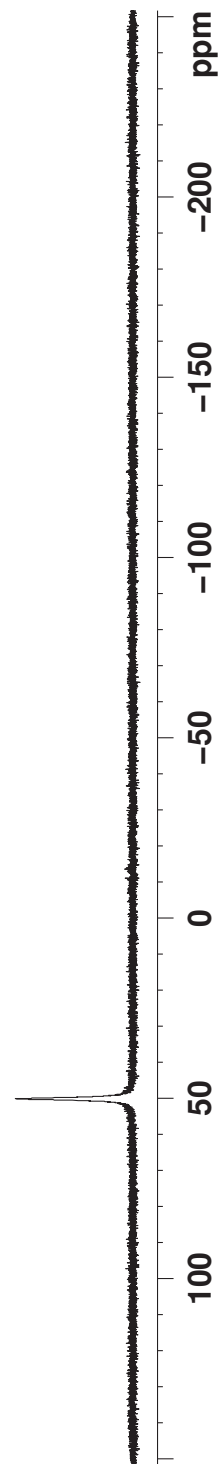

```

NAME      110120
EXPNO    2
PROCNO   1
Date_    20110120
Time     10.08
INSTRUM spect
PROBHD   5 mm PABBO BB
PULPROG zgpg30
TD        65536
SOLVENT  CDCl3
NS        2
DS        2
SRH       6188.112 Hz
AQ         0.094423 Hz
FIDRES    5.2355567 sec
RG         25.4
WDW       80.00 usec
DE         6.50 usec
TE        286.3 K
D1        1.00000000 sec
TD0       1
===== CHANNEL f1 =====
NUC1      1H
P1        11.80 usec
PL1       0.00 dB
PL12      11.55467796 W
SF01      300.1318534 MHz
SI        32768
SF        300.1300183 MHz
WDW       EM
SSB       0
LB        0.30 Hz
GB        0
PC        1.00
    
```

0.000

2.280  
 2.307  
 2.320  
 2.320  
 2.345  
 2.391  
 2.423  
 2.444  
 2.471  
 2.656  
 2.682  
 2.696  
 2.724  
 2.852  
 2.906  
 2.929  
 2.936  
 3.114  
 3.130  
 3.147  
 3.166  
 3.626  
 3.646  
 3.683  
 3.703  
 3.908  
 3.940  
 3.965  
 3.998  
 4.883  
 4.891  
 4.940  
 4.940  
 4.947  
 5.001  
 5.033  
 5.119  
 5.132  
 5.172  
 5.549  
 5.564  
 5.573  
 5.589  
 5.820  
 5.835  
 5.845  
 7.044  
 7.068  
 7.093  
 7.112  
 7.263  
 7.287  
 7.313  
 7.358  
 7.386  
 7.410  
 7.435  
 7.771  
 7.796

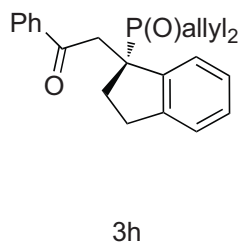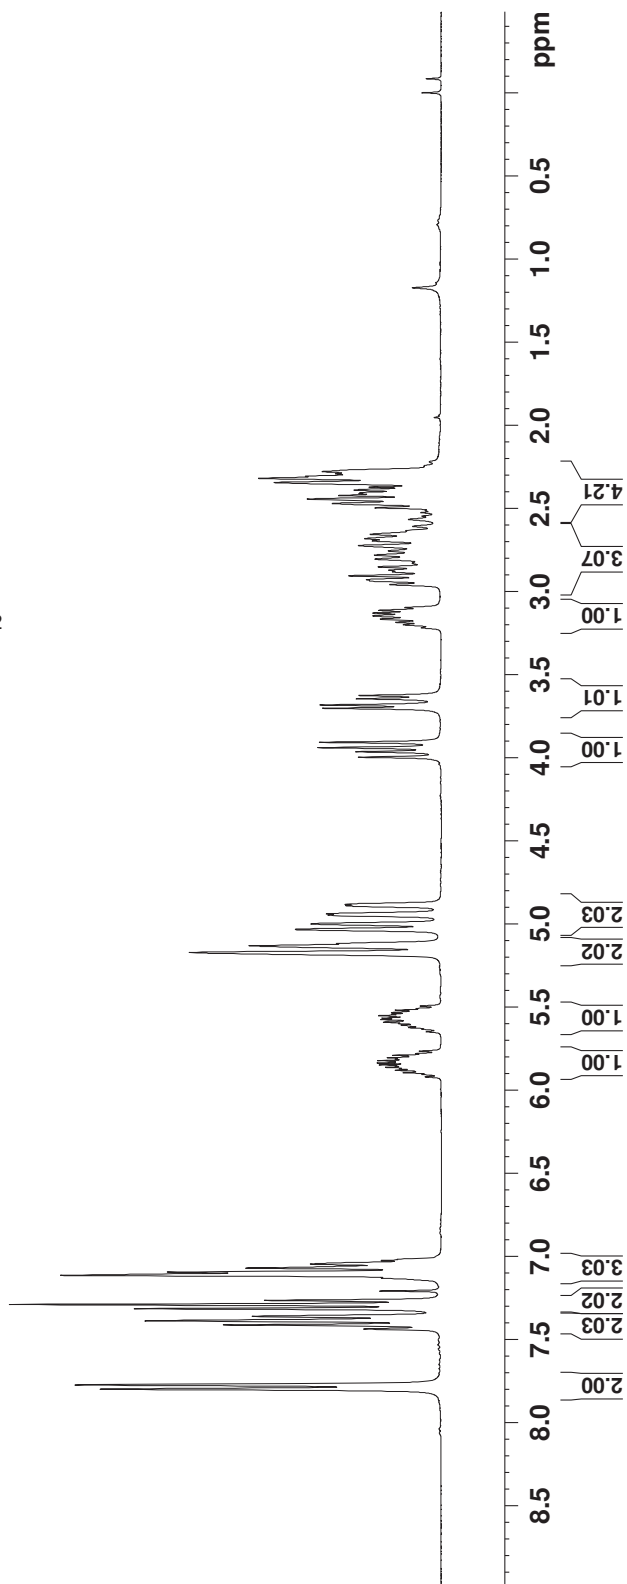

```

NAME 110120
EXPNO 3
PROCNO 1
Date_ 20110120
Time 10.23
INSTRUM spect
PROBHD 5 mm PABBO BB-
PULPROG zgpg30
TD 65536
SOLVENT CDC13
NS 359
DS 4
SWH 18028.846 Hz
FIDRES 0.275098 Hz
AQ 1.8175818 sec
RG 203
DW 27.733 usec
DE 6.50 usec
TE 287.0 K
D1 2.00000000 sec
D11 0.03000000 sec
TD0 1

===== CHANNEL f1 =====
NUC1 13C
P1 9.70 usec
PL1 0.00 dB
PL1W 29.38907051 W
SF01 75.4752953 MHz

===== CHANNEL f2 =====
CPDPRG2 waltz16
NUC2 1H
PCPD2 80.00 usec
PL2 1.00 dB
PL12 17.00 dB
PL13 17.00 dB
PL14 17.00 dB
PL15 17.00 dB
PL16 17.00 dB
PL17 17.00 dB
PL18 17.00 dB
PL19 17.00 dB
PL20 17.00 dB
PL21 17.00 dB
PL22 17.00 dB
PL23 17.00 dB
PL24 17.00 dB
PL25 17.00 dB
PL26 17.00 dB
PL27 17.00 dB
PL28 17.00 dB
PL29 17.00 dB
PL30 17.00 dB
PL31 17.00 dB
PL32 17.00 dB
PL33 17.00 dB
PL34 17.00 dB
PL35 17.00 dB
PL36 17.00 dB
PL37 17.00 dB
PL38 17.00 dB
PL39 17.00 dB
PL40 17.00 dB
PL41 17.00 dB
PL42 17.00 dB
PL43 17.00 dB
PL44 17.00 dB
PL45 17.00 dB
PL46 17.00 dB
PL47 17.00 dB
PL48 17.00 dB
PL49 17.00 dB
PL50 17.00 dB
PL51 17.00 dB
PL52 17.00 dB
PL53 17.00 dB
PL54 17.00 dB
PL55 17.00 dB
PL56 17.00 dB
PL57 17.00 dB
PL58 17.00 dB
PL59 17.00 dB
PL60 17.00 dB
PL61 17.00 dB
PL62 17.00 dB
PL63 17.00 dB
PL64 17.00 dB
PL65 17.00 dB
PL66 17.00 dB
PL67 17.00 dB
PL68 17.00 dB
PL69 17.00 dB
PL70 17.00 dB
PL71 17.00 dB
PL72 17.00 dB
PL73 17.00 dB
PL74 17.00 dB
PL75 17.00 dB
PL76 17.00 dB
PL77 17.00 dB
PL78 17.00 dB
PL79 17.00 dB
PL80 17.00 dB
PL81 17.00 dB
PL82 17.00 dB
PL83 17.00 dB
PL84 17.00 dB
PL85 17.00 dB
PL86 17.00 dB
PL87 17.00 dB
PL88 17.00 dB
PL89 17.00 dB
PL90 17.00 dB
PL91 17.00 dB
PL92 17.00 dB
PL93 17.00 dB
PL94 17.00 dB
PL95 17.00 dB
PL96 17.00 dB
PL97 17.00 dB
PL98 17.00 dB
PL99 17.00 dB
PL100 17.00 dB
PL101 17.00 dB
PL102 17.00 dB
PL103 17.00 dB
PL104 17.00 dB
PL105 17.00 dB
PL106 17.00 dB
PL107 17.00 dB
PL108 17.00 dB
PL109 17.00 dB
PL110 17.00 dB
PL111 17.00 dB
PL112 17.00 dB
PL113 17.00 dB
PL114 17.00 dB
PL115 17.00 dB
PL116 17.00 dB
PL117 17.00 dB
PL118 17.00 dB
PL119 17.00 dB
PL120 17.00 dB
PL121 17.00 dB
PL122 17.00 dB
PL123 17.00 dB
PL124 17.00 dB
PL125 17.00 dB
PL126 17.00 dB
PL127 17.00 dB
PL128 17.00 dB
PL129 17.00 dB
PL130 17.00 dB
PL131 17.00 dB
PL132 17.00 dB
PL133 17.00 dB
PL134 17.00 dB
PL135 17.00 dB
PL136 17.00 dB
PL137 17.00 dB
PL138 17.00 dB
PL139 17.00 dB
PL140 17.00 dB
PL141 17.00 dB
PL142 17.00 dB
PL143 17.00 dB
PL144 17.00 dB
PL145 17.00 dB
PL146 17.00 dB
PL147 17.00 dB
PL148 17.00 dB
PL149 17.00 dB
PL150 17.00 dB
PL151 17.00 dB
PL152 17.00 dB
PL153 17.00 dB
PL154 17.00 dB
PL155 17.00 dB
PL156 17.00 dB
PL157 17.00 dB
PL158 17.00 dB
PL159 17.00 dB
PL160 17.00 dB
PL161 17.00 dB
PL162 17.00 dB
PL163 17.00 dB
PL164 17.00 dB
PL165 17.00 dB
PL166 17.00 dB
PL167 17.00 dB
PL168 17.00 dB
PL169 17.00 dB
PL170 17.00 dB
PL171 17.00 dB
PL172 17.00 dB
PL173 17.00 dB
PL174 17.00 dB
PL175 17.00 dB
PL176 17.00 dB
PL177 17.00 dB
PL178 17.00 dB
PL179 17.00 dB
PL180 17.00 dB
PL181 17.00 dB
PL182 17.00 dB
PL183 17.00 dB
PL184 17.00 dB
PL185 17.00 dB
PL186 17.00 dB
PL187 17.00 dB
PL188 17.00 dB
PL189 17.00 dB
PL190 17.00 dB
PL191 17.00 dB
PL192 17.00 dB
PL193 17.00 dB
PL194 17.00 dB
PL195 17.00 dB
PL196 17.00 dB
PL197 17.00 dB
PL198 17.00 dB
PL199 17.00 dB
PL200 17.00 dB
PL201 17.00 dB
PL202 17.00 dB
PL203 17.00 dB
PL204 17.00 dB
PL205 17.00 dB
PL206 17.00 dB
PL207 17.00 dB
PL208 17.00 dB
PL209 17.00 dB
PL210 17.00 dB
PL211 17.00 dB
PL212 17.00 dB
PL213 17.00 dB
PL214 17.00 dB
PL215 17.00 dB
PL216 17.00 dB
PL217 17.00 dB
PL218 17.00 dB
PL219 17.00 dB
PL220 17.00 dB
PL221 17.00 dB
PL222 17.00 dB
PL223 17.00 dB
PL224 17.00 dB
PL225 17.00 dB
PL226 17.00 dB
PL227 17.00 dB
PL228 17.00 dB
PL229 17.00 dB
PL230 17.00 dB
PL231 17.00 dB
PL232 17.00 dB
PL233 17.00 dB
PL234 17.00 dB
PL235 17.00 dB
PL236 17.00 dB
PL237 17.00 dB
PL238 17.00 dB
PL239 17.00 dB
PL240 17.00 dB
PL241 17.00 dB
PL242 17.00 dB
PL243 17.00 dB
PL244 17.00 dB
PL245 17.00 dB
PL246 17.00 dB
PL247 17.00 dB
PL248 17.00 dB
PL249 17.00 dB
PL250 17.00 dB
PL251 17.00 dB
PL252 17.00 dB
PL253 17.00 dB
PL254 17.00 dB
PL255 17.00 dB
PL256 17.00 dB
PL257 17.00 dB
PL258 17.00 dB
PL259 17.00 dB
PL260 17.00 dB
PL261 17.00 dB
PL262 17.00 dB
PL263 17.00 dB
PL264 17.00 dB
PL265 17.00 dB
PL266 17.00 dB
PL267 17.00 dB
PL268 17.00 dB
PL269 17.00 dB
PL270 17.00 dB
PL271 17.00 dB
PL272 17.00 dB
PL273 17.00 dB
PL274 17.00 dB
PL275 17.00 dB
PL276 17.00 dB
PL277 17.00 dB
PL278 17.00 dB
PL279 17.00 dB
PL280 17.00 dB
PL281 17.00 dB
PL282 17.00 dB
PL283 17.00 dB
PL284 17.00 dB
PL285 17.00 dB
PL286 17.00 dB
PL287 17.00 dB
PL288 17.00 dB
PL289 17.00 dB
PL290 17.00 dB
PL291 17.00 dB
PL292 17.00 dB
PL293 17.00 dB
PL294 17.00 dB
PL295 17.00 dB
PL296 17.00 dB
PL297 17.00 dB
PL298 17.00 dB
PL299 17.00 dB
PL300 17.00 dB
PL301 17.00 dB
PL302 17.00 dB
PL303 17.00 dB
PL304 17.00 dB
PL305 17.00 dB
PL306 17.00 dB
PL307 17.00 dB
PL308 17.00 dB
PL309 17.00 dB
PL310 17.00 dB
PL311 17.00 dB
PL312 17.00 dB
PL313 17.00 dB
PL314 17.00 dB
PL315 17.00 dB
PL316 17.00 dB
PL317 17.00 dB
PL318 17.00 dB
PL319 17.00 dB
PL320 17.00 dB
PL321 17.00 dB
PL322 17.00 dB
PL323 17.00 dB
PL324 17.00 dB
PL325 17.00 dB
PL326 17.00 dB
PL327 17.00 dB
PL328 17.00 dB
PL329 17.00 dB
PL330 17.00 dB
PL331 17.00 dB
PL332 17.00 dB
PL333 17.00 dB
PL334 17.00 dB
PL335 17.00 dB
PL336 17.00 dB
PL337 17.00 dB
PL338 17.00 dB
PL339 17.00 dB
PL340 17.00 dB
PL341 17.00 dB
PL342 17.00 dB
PL343 17.00 dB
PL344 17.00 dB
PL345 17.00 dB
PL346 17.00 dB
PL347 17.00 dB
PL348 17.00 dB
PL349 17.00 dB
PL350 17.00 dB
PL351 17.00 dB
PL352 17.00 dB
PL353 17.00 dB
PL354 17.00 dB
PL355 17.00 dB
PL356 17.00 dB
PL357 17.00 dB
PL358 17.00 dB
PL359 17.00 dB
PL360 17.00 dB
PL361 17.00 dB
PL362 17.00 dB
PL363 17.00 dB
PL364 17.00 dB
PL365 17.00 dB
PL366 17.00 dB
PL367 17.00 dB
PL368 17.00 dB
PL369 17.00 dB
PL370 17.00 dB
PL371 17.00 dB
PL372 17.00 dB
PL373 17.00 dB
PL374 17.00 dB
PL375 17.00 dB
PL376 17.00 dB
PL377 17.00 dB
PL378 17.00 dB
PL379 17.00 dB
PL380 17.00 dB
PL381 17.00 dB
PL382 17.00 dB
PL383 17.00 dB
PL384 17.00 dB
PL385 17.00 dB
PL386 17.00 dB
PL387 17.00 dB
PL388 17.00 dB
PL389 17.00 dB
PL390 17.00 dB
PL391 17.00 dB
PL392 17.00 dB
PL393 17.00 dB
PL394 17.00 dB
PL395 17.00 dB
PL396 17.00 dB
PL397 17.00 dB
PL398 17.00 dB
PL399 17.00 dB
PL400 17.00 dB
PL401 17.00 dB
PL402 17.00 dB
PL403 17.00 dB
PL404 17.00 dB
PL405 17.00 dB
PL406 17.00 dB
PL407 17.00 dB
PL408 17.00 dB
PL409 17.00 dB
PL410 17.00 dB
PL411 17.00 dB
PL412 17.00 dB
PL413 17.00 dB
PL414 17.00 dB
PL415 17.00 dB
PL416 17.00 dB
PL417 17.00 dB
PL418 17.00 dB
PL419 17.00 dB
PL420 17.00 dB
PL421 17.00 dB
PL422 17.00 dB
PL423 17.00 dB
PL424 17.00 dB
PL425 17.00 dB
PL426 17.00 dB
PL427 17.00 dB
PL428 17.00 dB
PL429 17.00 dB
PL430 17.00 dB
PL431 17.00 dB
PL432 17.00 dB
PL433 17.00 dB
PL434 17.00 dB
PL435 17.00 dB
PL436 17.00 dB
PL437 17.00 dB
PL438 17.00 dB
PL439 17.00 dB
PL440 17.00 dB
PL441 17.00 dB
PL442 17.00 dB
PL443 17.00 dB
PL444 17.00 dB
PL445 17.00 dB
PL446 17.00 dB
PL447 17.00 dB
PL448 17.00 dB
PL449 17.00 dB
PL450 17.00 dB
PL451 17.00 dB
PL452 17.00 dB
PL453 17.00 dB
PL454 17.00 dB
PL455 17.00 dB
PL456 17.00 dB
PL457 17.00 dB
PL458 17.00 dB
PL459 17.00 dB
PL460 17.00 dB
PL461 17.00 dB
PL462 17.00 dB
PL463 17.00 dB
PL464 17.00 dB
PL465 17.00 dB
PL466 17.00 dB
PL467 17.00 dB
PL468 17.00 dB
PL469 17.00 dB
PL470 17.00 dB
PL471 17.00 dB
PL472 17.00 dB
PL473 17.00 dB
PL474 17.00 dB
PL475 17.00 dB
PL476 17.00 dB
PL477 17.00 dB
PL478 17.00 dB
PL479 17.00 dB
PL480 17.00 dB
PL481 17.00 dB
PL482 17.00 dB
PL483 17.00 dB
PL484 17.00 dB
PL485 17.00 dB
PL486 17.00 dB
PL487 17.00 dB
PL488 17.00 dB
PL489 17.00 dB
PL490 17.00 dB
PL491 17.00 dB
PL492 17.00 dB
PL493 17.00 dB
PL494 17.00 dB
PL495 17.00 dB
PL496 17.00 dB
PL497 17.00 dB
PL498 17.00 dB
PL499 17.00 dB
PL500 17.00 dB
    
```

52.57  
51.76  
42.06  
31.86  
31.33  
31.29  
31.09  
31.03  
30.40  
30.20

77.42  
77.00  
76.57

144.11  
144.02  
141.53  
137.04  
132.96  
128.38  
128.29  
127.90  
127.77  
127.74  
127.64  
126.68  
126.65  
124.70  
124.66  
124.55  
124.53  
120.25  
120.10  
119.97  
119.83

197.35  
197.20

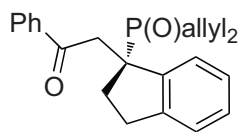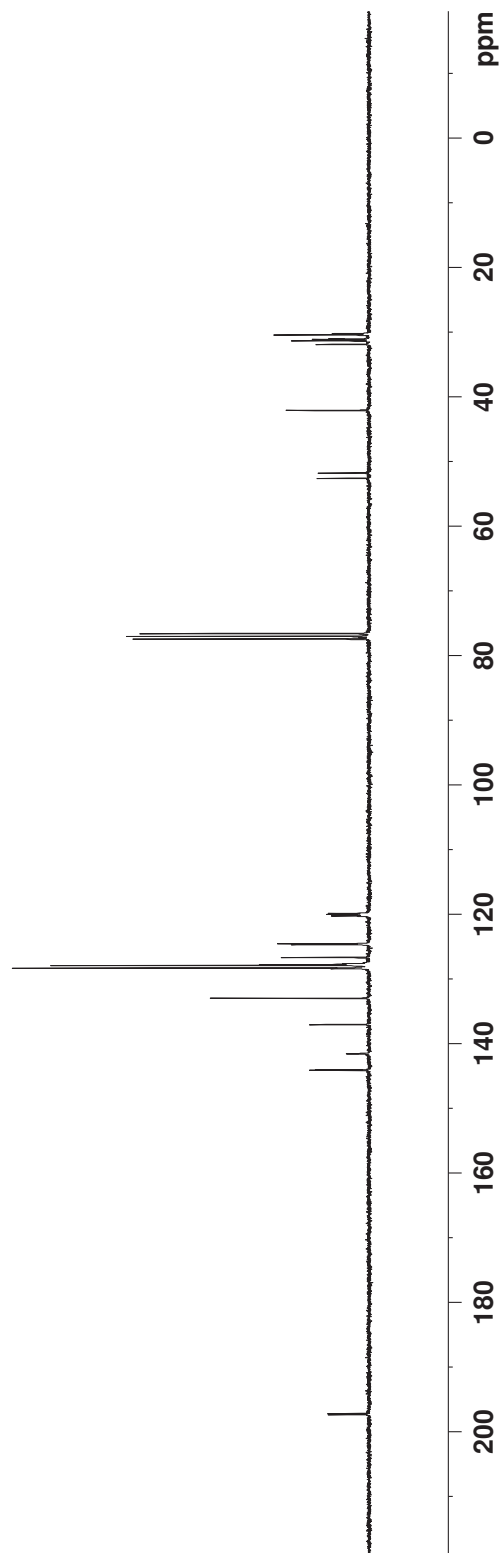

```
NAME 110120
EXPNO 1
PROCNO 1
Date_ 20110120
Time_ 10.05
INSTRUM spect
PROBHD 5 mm PABBO BB-
PULPROG zgpg30
TD 65536
SOLVENT CDCl3
NS 16
DS 4
SWH 49019.609 Hz
FIDRES 0.747980 Hz
AQ 0.6685172 sec
RG 203
DW 10.200 usec
DE 6.50 usec
TE 286.3 K
D1 2.0000000 sec
D11 0.0300000 sec
TDO 1

===== CHANNEL f1 =====
NUC1 31P
P1 9.10 usec
PL1 0.00 dB
PL1W 36.92473221 W
SFO1 121.4887762 MHz

===== CHANNEL f2 =====
CPDPRG2 waltz16
NUC2 1H
PCPD2 80.00 usec
PL2 1.00 dB
PL12 17.00 dB
PL13 17.00 dB
PL12W 9.17820644 W
PL13W 0.23054613 W
SFO2 300.1312005 MHz
SI 32768
SF 121.4948510 MHz
WDM EM
SSB 0
LB 1.00 Hz
GB 0
PC 1.40
```

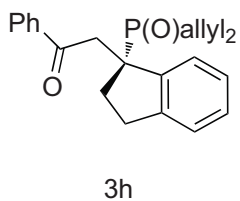

50.48

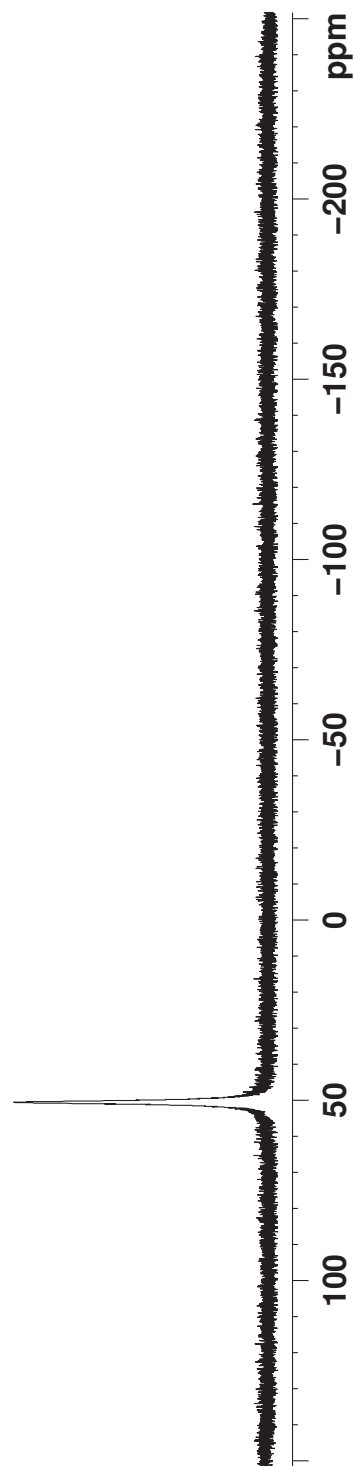

```

NAME      110223
EXPNO    10
PROCNO   1
Date_    20110223
Time     18.58
INSTRUM  spect
PROBHD   5 mm PABBO BB-
PULPROG  zg30
TD        65536
SOLVENT  CDCl3
NS        8
DS        2
SWH       6188.119 Hz
FIDRES   0.094423 Hz
AQ        5.2953587 sec
RG        40.3
DW        80.800 usec
DE        6.50 usec
TE        288.2 K
D1        1.0000000 sec
TD0       1

===== CHANNEL f1 =====
NUC1      1H
P1        11.80 usec
PL1       0.00 dB
PL1W      11.55467796 W
SF01      300.1318534 MHz
SI        32768
SF        300.1318534 MHz
WDW       EM
SSB       0
LB        0.30 Hz
GB        0
PC        1.00
    
```

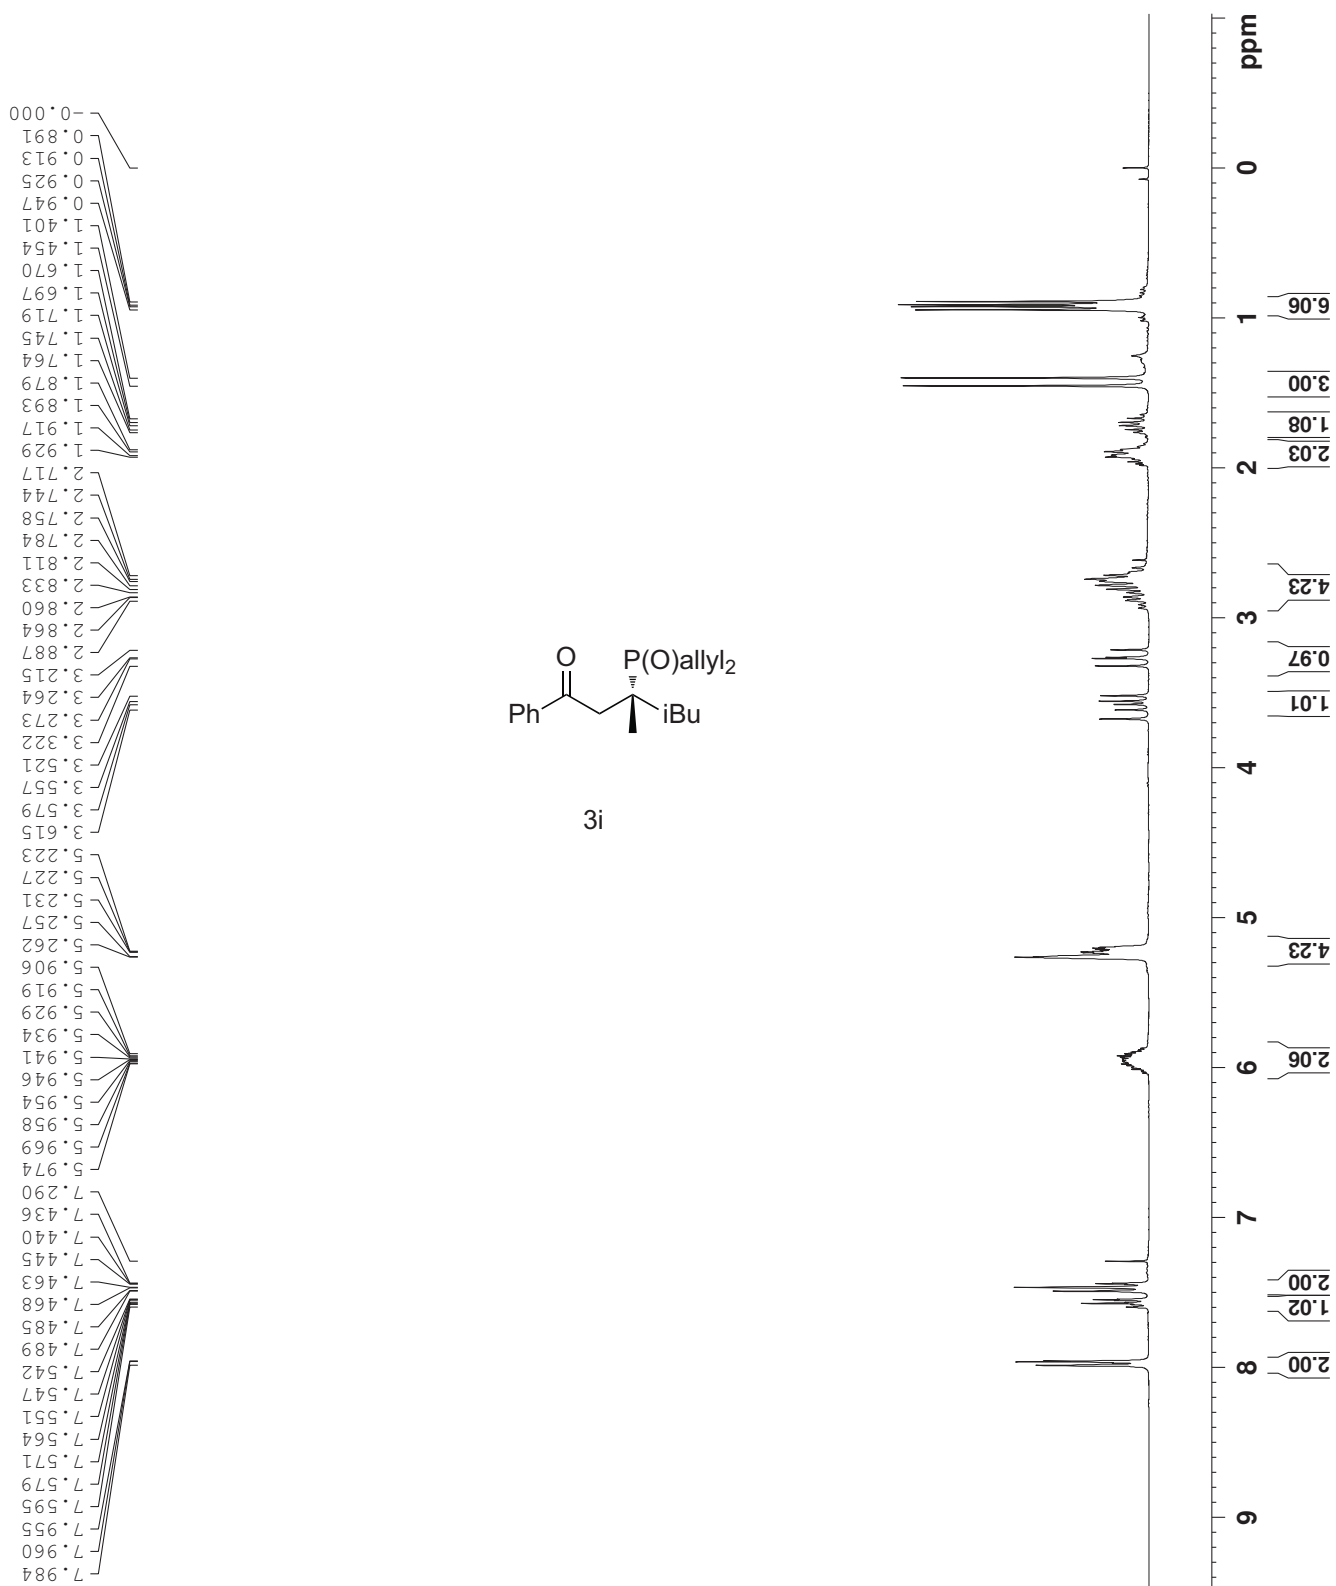

```

NAME                110223
EXPNO                12
PROCNO               1
Date_                20110223
Time                19.12
INSTRUM              spect
PROBHD               5 mm PABBO BB-
PULPROG              zgpg30
TD                   65536
SOLVENT              CDC13
NS                   260
DS                   4
SWH                  18028.846 Hz
FIDRES               0.275098 Hz
AQ                   1.8175818 sec
RG                   203
DW                   27.733 usec
DE                   6.50 usec
TE                   289.1 K
D1                   2.00000000 sec
D11                  0.03000000 sec
TD0                  1

===== CHANNEL f1 =====
NUC1                 13C
P1                   9.70 usec
PL1                  0.00 dB
PL1W                 29.38907051 W
SF01                 75.4752953 MHz

===== CHANNEL f2 =====
CPDPRG2              waltz16
NUC2                 1H
PCPD2               80.00 usec
PL2                  1.00 dB
PL12                 17.00 dB
PL13                 17.00 dB
PL1W                 9.17820644 W
PL2W                 0.23054813 W
PL13W                0.23054813 W
SF02                 300.1312005 MHz
SI                   32768
ST                   75.4677542 MHz
WDW                  EM
SSB                  0
LB                   1.00 Hz
GB                   0
PC                   1.40
    
```

42.13  
41.60  
40.89  
40.09  
32.15  
32.07  
31.37  
31.30  
25.22  
25.09  
24.34  
24.23  
21.26

77.42  
77.00  
76.58

137.53  
133.14  
128.96  
128.91  
128.85  
128.80  
128.57  
128.01  
120.09  
119.95

198.72  
198.61

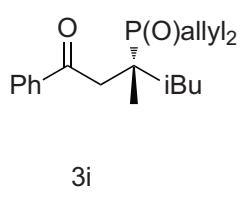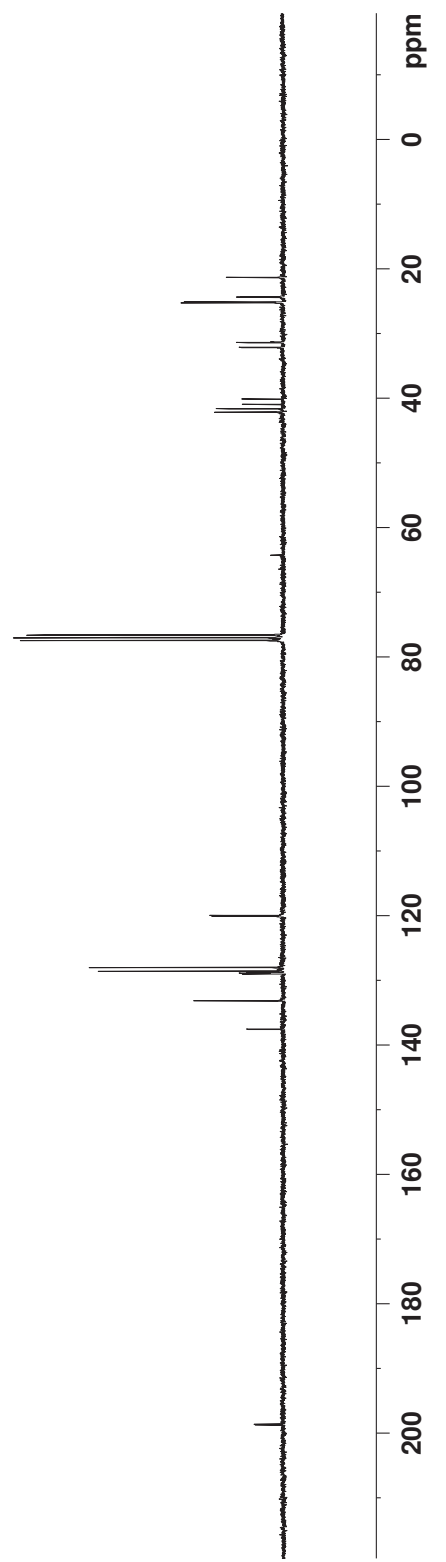



```
NAME 110223
EXPNO 11
PROCNO 1
Date_ 20110223
Time_ 19.02
INSTRUM spect
PROBHD 5 mm PABBO BB-
PULPROG zgpg30
TD 65536
SOLVENT CDCl3
NS 16
DS 4
SWH 49019.609 Hz
FIDRES 0.747980 Hz
AQ 0.6685172 sec
RG 203
DW 10.200 usec
DE 6.50 usec
TE 288.6 K
D1 2.0000000 sec
D11 0.0300000 sec
TDO 1

===== CHANNEL f1 =====
NUC1 31P
P1 9.10 usec
PL1 0.00 dB
PL1W 36.92473221 W
SFO1 121.4887762 MHz

===== CHANNEL f2 =====
CPDPRG2 waltz16
NUC2 1H
PCPD2 80.00 usec
PL2 1.00 dB
PL12 17.00 dB
PL13 17.00 dB
PL12W 9.17820644 W
PL13W 0.23054613 W
SFO2 300.1312005 MHz
SI 32768
SF 121.4948510 MHz
WDM EM
SSB 0
LB 1.00 Hz
GB 0
PC 1.40
```

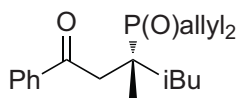

3i

52.92

100 50 0 -50 -100 -150 -200 ppm

```

NAME      110223
EXPNO     7
PROCNO    1
Date_     20110223
Time      17.19
INSTRUM   spect
PROBHD    5 mm PABBO BB-
PULPROG   zg30
TD         65536
SOLVENT   CDCl3
DS         8
NS         2
SWH        6188.119 Hz
FIDRES     0.094423 Hz
AQ         5.2953587 sec
RG         30.800 usec
DE         6.50 usec
TE         288.3 K
D1         1.00000000 sec
TD0        1

===== CHANNEL f1 =====
NUC1       1H
P1         11.80 usec
PL1        0.00 dB
P2         11.5546736 W
PL2        300.1318534 MHz
SF01       300.1299928 MHz
WDW        EM
SSB        0
LB         0.30 Hz
GB         0
PC         1.00
    
```

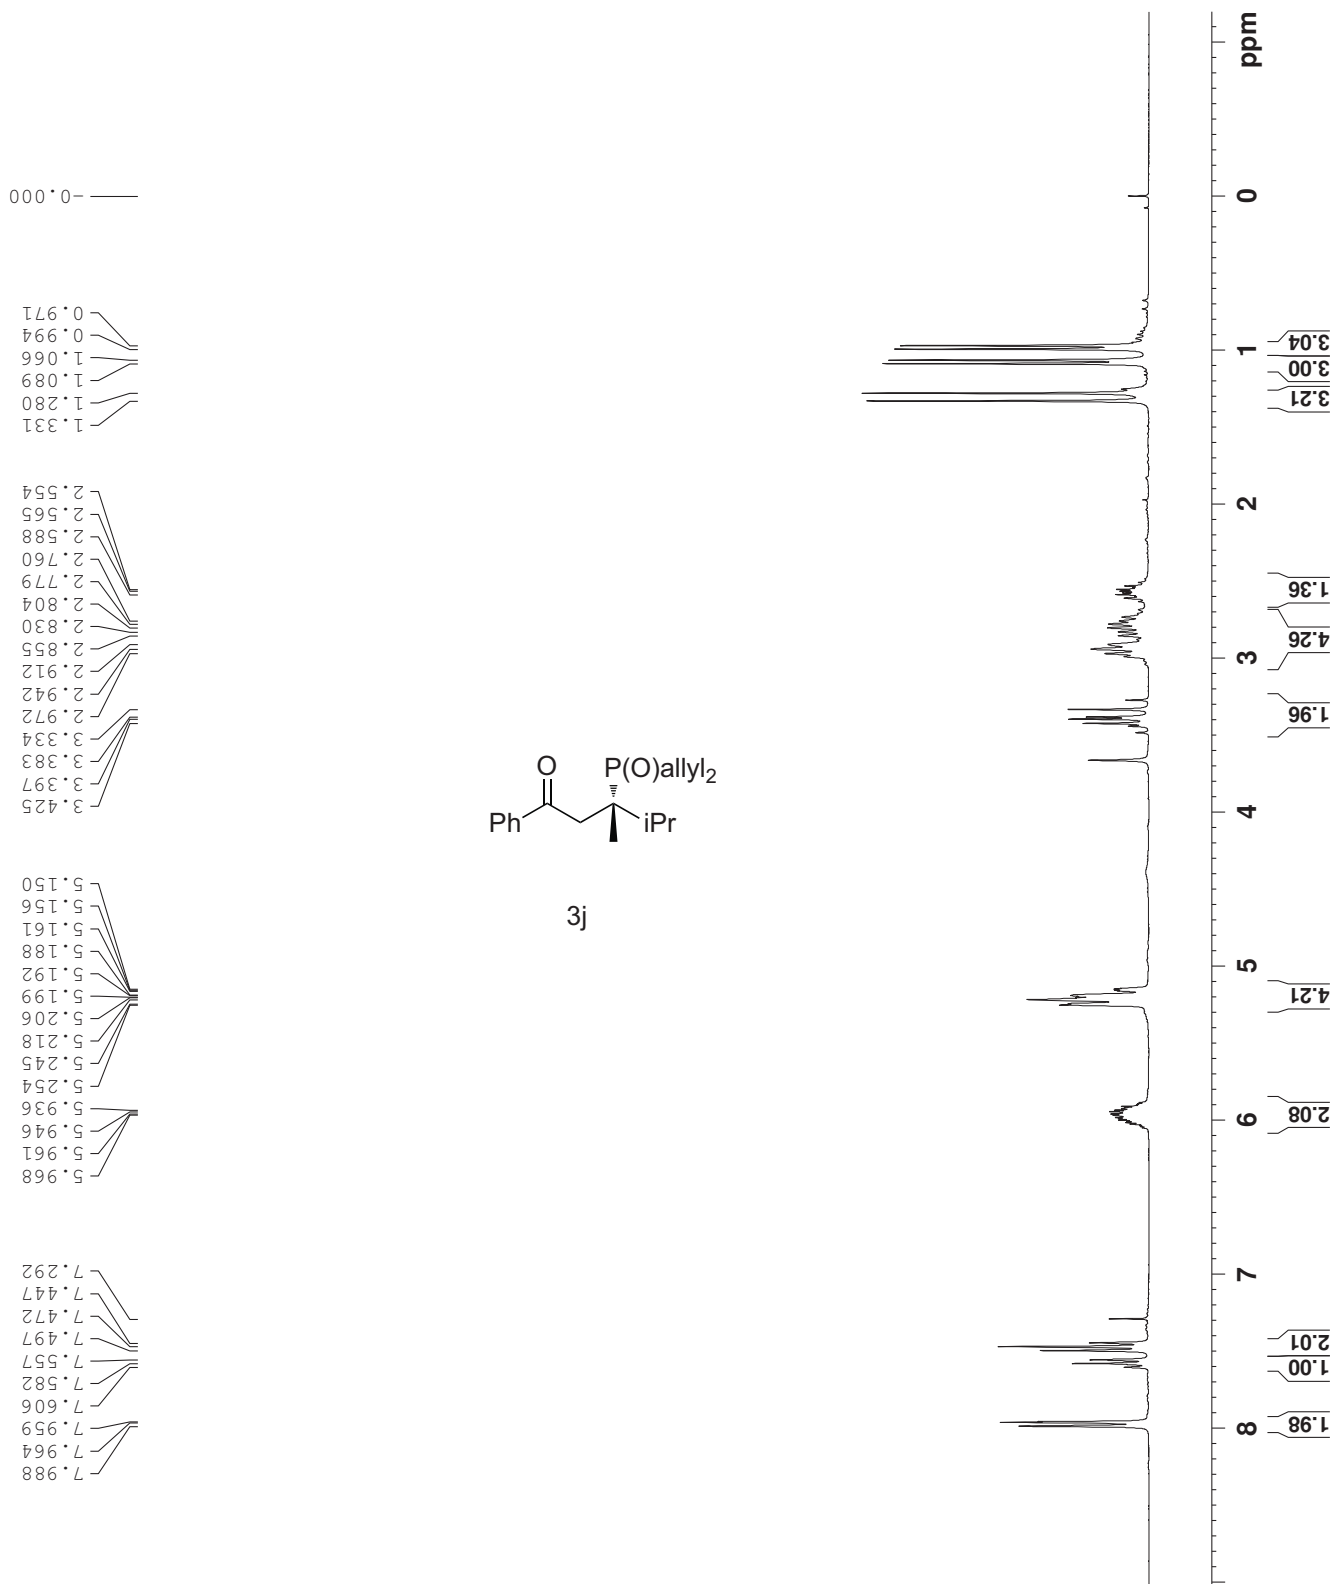

```

NAME 110223
EXPNO 9
PROCNO 1
Date_ 20110223
Time 18.03
INSTRUM spect
PROBHD 5 mm PABBO BB-
PULPROG zgpg30
TD 65536
SOLVENT CDC13
NS 512
DS 4
SWH 18028.846 Hz
FIDRES 0.275098 Hz
AQ 1.8175818 sec
RG 203
DW 27.733 usec
DE 6.50 usec
TE 289.3 K
D1 2.00000000 sec
D11 0.03000000 sec
TD0 1

===== CHANNEL f1 =====
NUC1 13C
P1 9.70 usec
PL1 0.00 dB
PL1W 29.38907051 W
SF01 75.4752953 MHz

===== CHANNEL f2 =====
CPDPRG2 waltz16
NUC2 1H
PCPD2 80.00 usec
PL2 1.00 dB
PL12 17.00 dB
PL13 17.00 dB
PL1W 9.17820644 W
PL2W 0.23054613 W
PL13W 0.23054613 W
SF02 300.1312005 MHz
SI 32768
ST 75.4677549 MHz
WDW EM
SSB 0
LB 1.00 Hz
GB 0
PC 1.40
    
```

17.87  
18.11  
18.20  
18.94  
18.99  
30.28  
32.71  
33.32  
33.47  
34.10  
41.70  
43.07  
43.85

64.24

76.58  
77.00  
77.43

119.63  
119.78  
119.93  
127.97  
128.60  
129.19  
129.25  
129.31  
129.36  
133.23  
137.17

198.95  
198.95

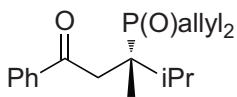

3j

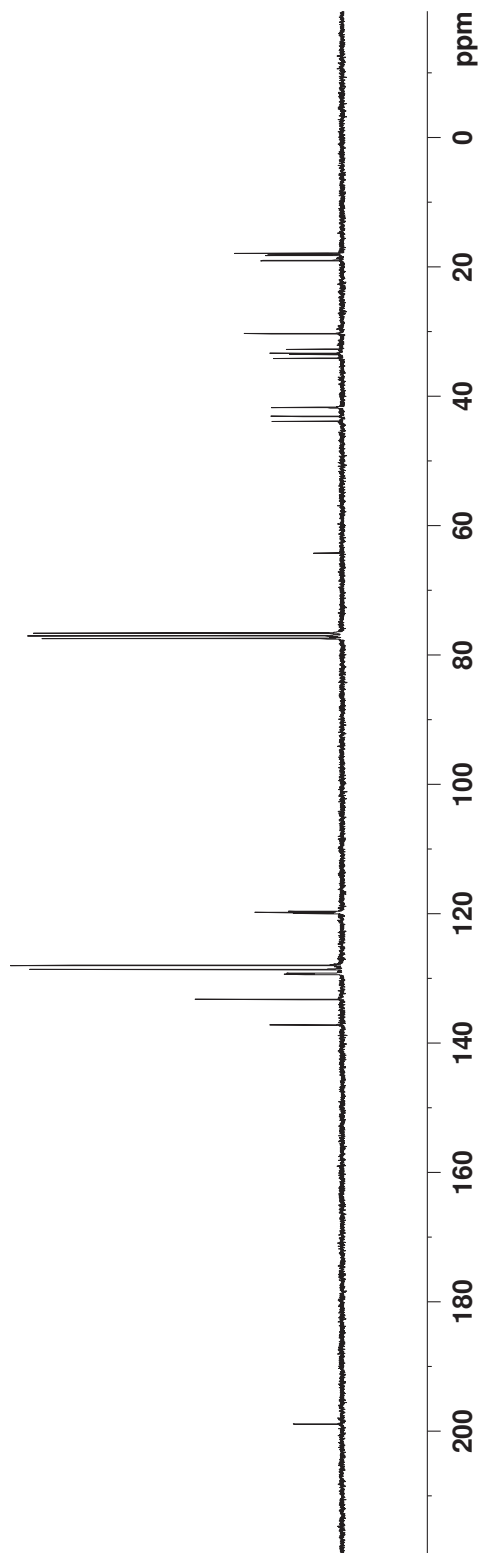

```

NAME 110223
EXPNO 8
PROCNO 1
Date_ 20110223
Time_ 17.23
INSTRUM spect
PROBHD 5 mm PABBO BB-
PULPROG zgpg30
TD 65536
SOLVENT CDCl3
NS 15
DS 4
SWH 49019.609 Hz
FIDRES 0.747980 Hz
AQ 0.6685172 sec
RG 203
DW 10.200 usec
DE 6.50 usec
TE 288.4 K
D1 2.0000000 sec
D11 0.0300000 sec
TDO 1

===== CHANNEL f1 =====
NUC1 31P
P1 9.10 usec
PL1 0.00 dB
PL1W 36.92473221 W
SFO1 121.4887762 MHz

===== CHANNEL f2 =====
CPDPRG2 waltz16
NUC2 1H
PCPD2 80.00 usec
PL2 1.00 dB
PL12 17.00 dB
PL13 17.00 dB
PL12W 9.17820644 W
PL13W 0.23054613 W
SFO2 300.1312005 MHz
SI 32768
SF 121.4948510 MHz
WDW EM
SSB 0
LB 1.00 Hz
GB 0
PC 1.40
    
```

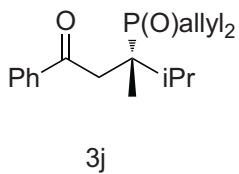

53.76

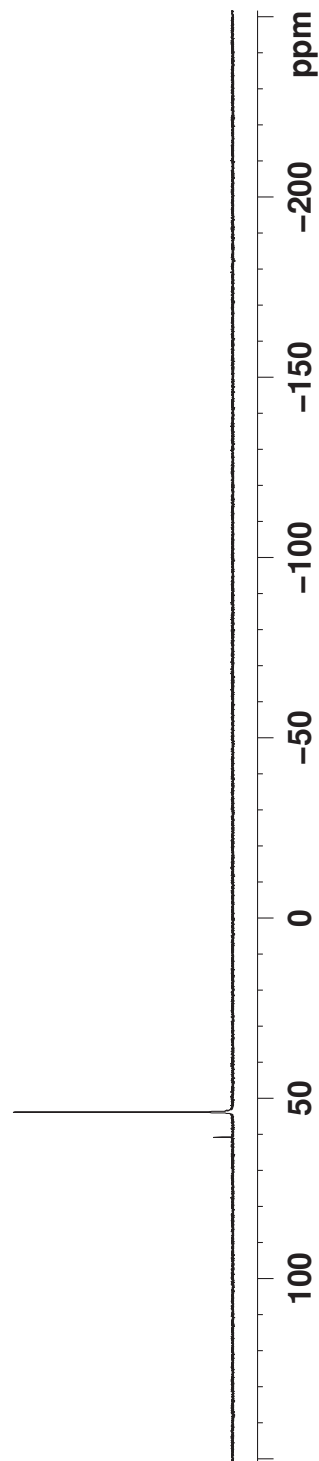

```

NAME      110112
EXPNO    13
PROCNO   1
Date_    20110112
Time     12.39
INSTRUM  spect
PROBHD   5 mm PABBO BB-
PULPROG  zg30
TD        65536
SOLVENT  CDCl3
NS        8
DS        2
SWH       6188.119 Hz
FIDRES   0.094423 Hz
AQ        5.2953587 sec
RG        36
DW        80.800 usec
DE        6.50 usec
TE        285.7 K
D1        1.00000000 sec
TD0       1

===== CHANNEL f1 =====
NUC1      1H
P1        11.80 usec
PL1       0.00 dB
PL1W      11.55467796 W
SFO1      300.1318534 MHz
SI        32768
SF        300.1299948 MHz
WDW       EM
SSB       0
LB        0.30 Hz
GB        0
PC        1.00
    
```

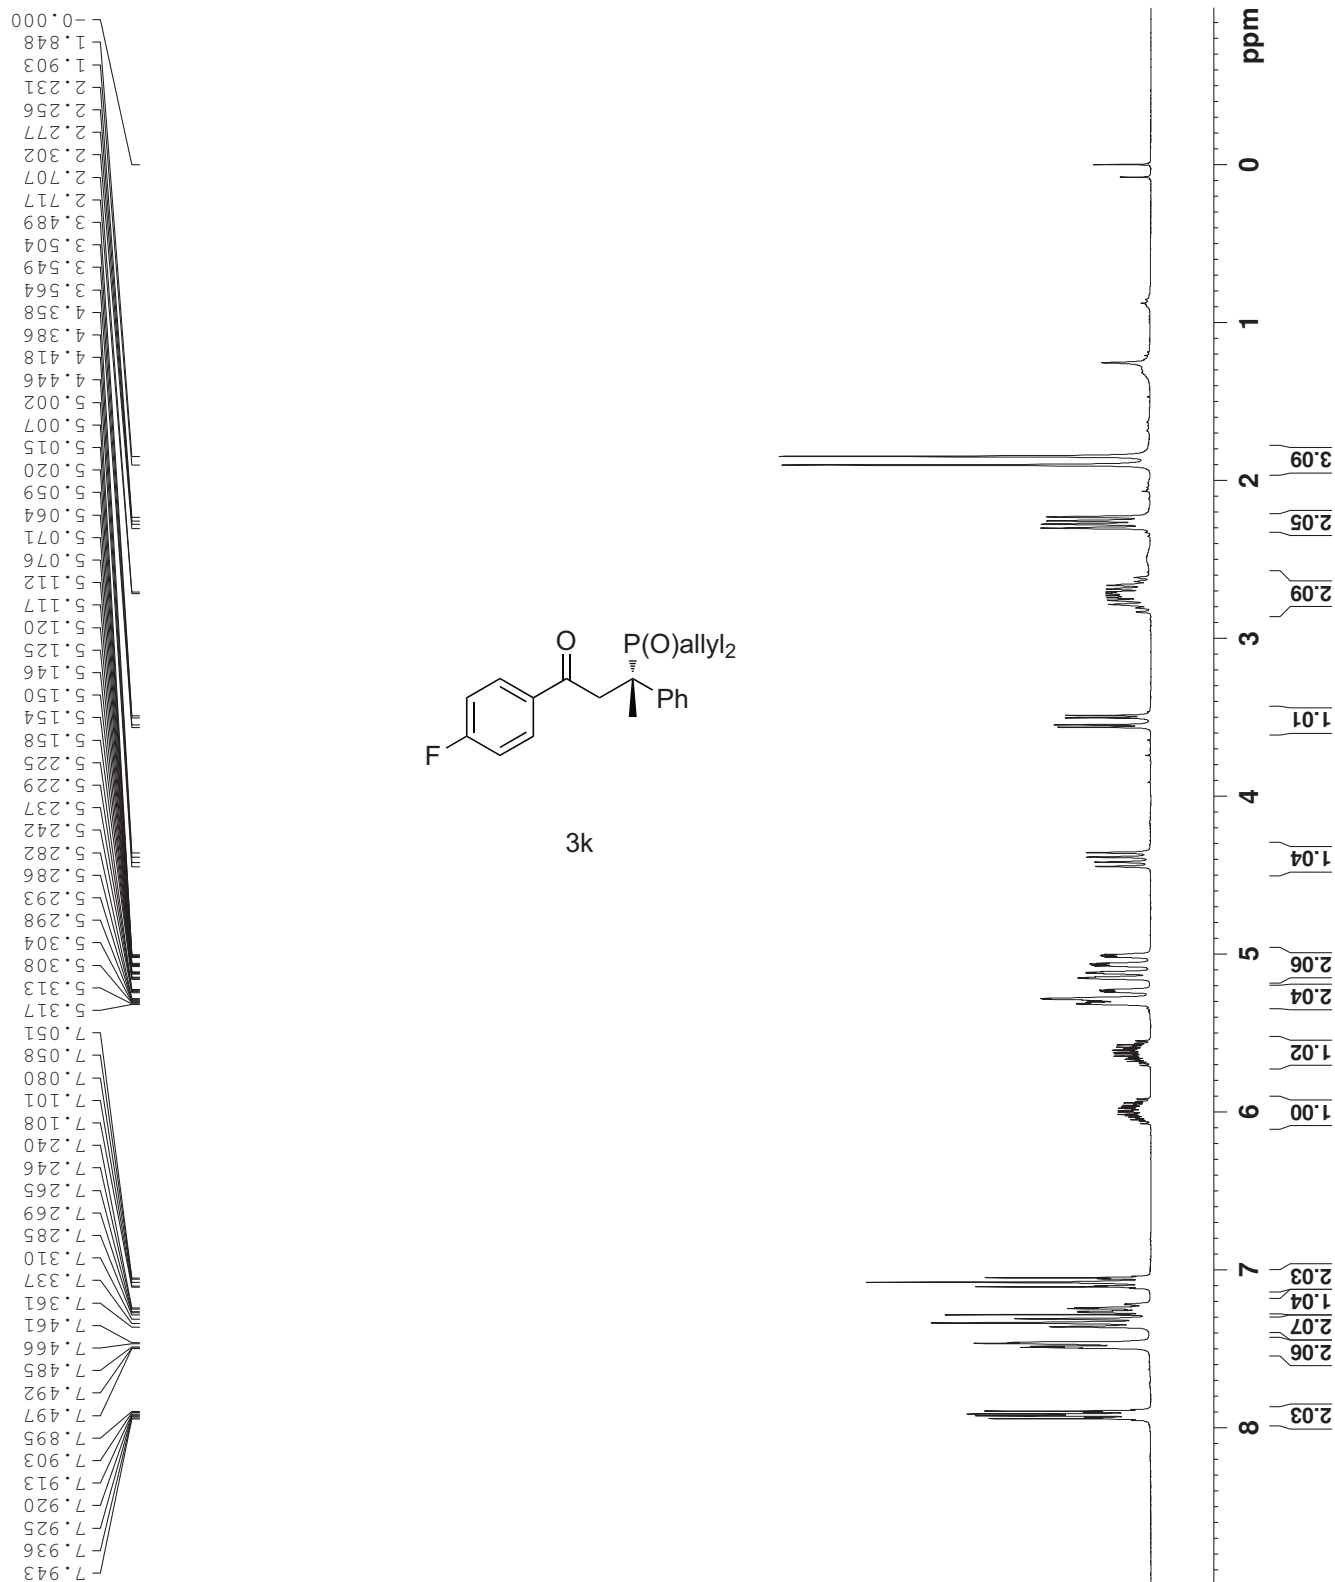

```

NAME 110112
EXPNO 14
PROCNO 1
Date_ 20110112
Time 13.47
INSTRUM spect
PROBHD 5 mm PABBO BB-
PULPROG zgpg30
TD 65536
SOLVENT CDC13
NS 1024
DS 4
SWH 18028.846 Hz
FIDRES 0.275098 Hz
AQ 1.8175818 sec
RG 203
DW 27.733 usec
DE 6.50 usec
TE 286.5 K
D1 2.00000000 sec
D11 0.03000000 sec
TD0 1

===== CHANNEL f1 =====
NUC1 13C
P1 9.70 usec
PL1 0.00 dB
PL1W 29.38907051 W
SF01 75.4752953 MHz

===== CHANNEL f2 =====
CPDPRG2 waltz16
NUC2 1H
PCPD2 80.00 usec
PL2 1.00 dB
PL12 17.00 dB
PL13 17.00 dB
PL1W 9.17820644 W
PL12W 0.23054813 W
PL13W 0.23054813 W
SF02 300.1312005 MHz
SI 32768
ST 75.4677566 MHz
WDW EM
SSB 0
LB 1.00 Hz
GB 0
PC 1.40
    
```

194.69  
194.50  
167.29  
163.91  
139.29  
139.24  
133.71  
133.67  
133.64  
130.57  
130.45  
128.57  
128.49  
128.45  
128.15  
128.04  
126.92  
126.89  
126.86  
120.42  
120.27  
120.11  
119.97  
115.66  
115.37  
77.42  
77.00  
76.58  
44.15  
43.40  
42.43  
31.54  
31.14  
30.77  
30.31  
19.19

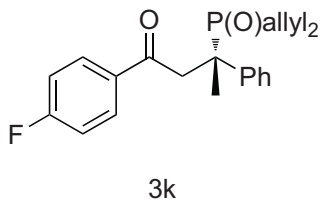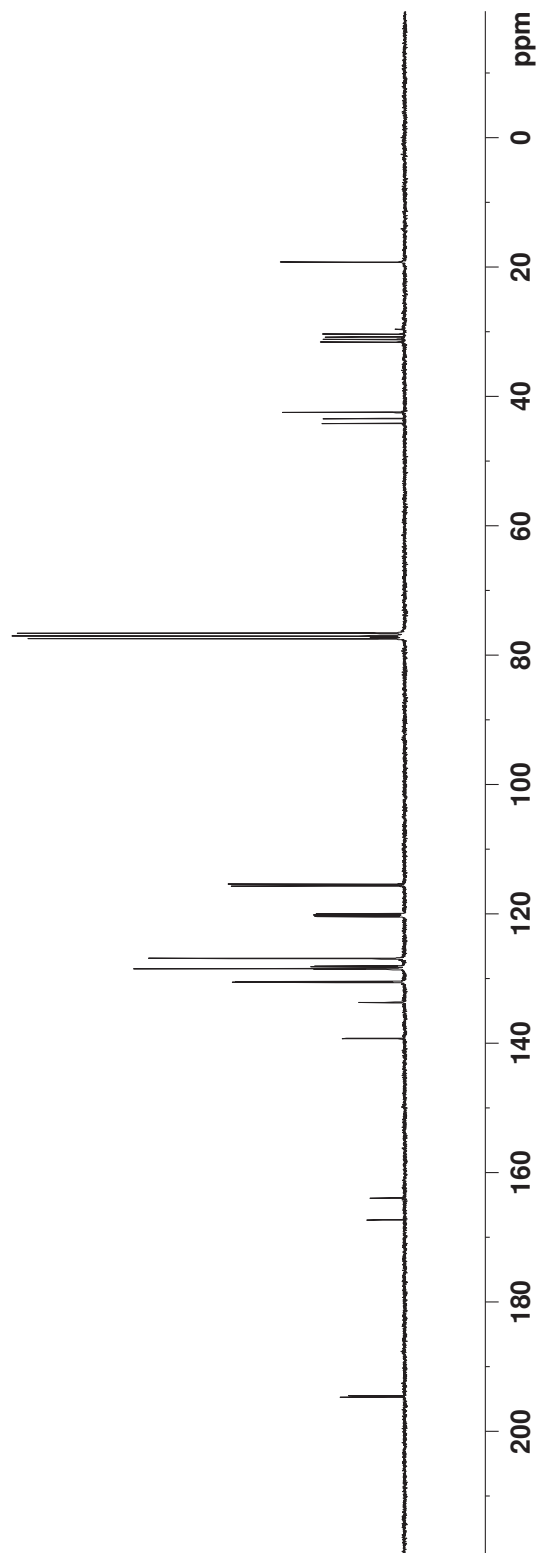

```

NAME          110112
EXPNO         15
PROCNO        1
Date_         20110112
Time_        14.53
INSTRUM       spect
PROBHD        5 mm PABBO BB-
PULPROG       zgpg30
TD            65536
SOLVENT       CDCl3
NS            16
DS            4
SWH           49019.609 Hz
FIDRES        0.747980 Hz
AQ            0.6685172 sec
RG            203
DW            10.200 usec
DE            6.50 usec
TE            285.7 K
D1            2.0000000 sec
D11           0.0300000 sec
TD0           1

===== CHANNEL f1 =====
NUC1          31P
P1            9.10 usec
PL1           0.00 dB
PL1W          36.92473221 W
SFO1          121.4887762 MHz

===== CHANNEL f2 =====
CPDPRG2       waltz16
NUC2          1H
PCPD2         80.00 usec
PL2           1.00 dB
PL12          17.00 dB
PL13          17.00 dB
PL12W         9.17820644 W
PL13W         0.23054613 W
SFO2          300.1312005 MHz
SI            32768
SF            121.4948510 MHz
WDW           EM
SSB           0
LB            1.00 Hz
GB            0
PC            1.40
    
```

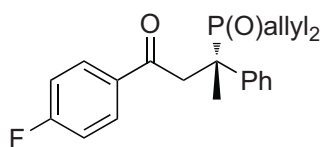

3k

49.83

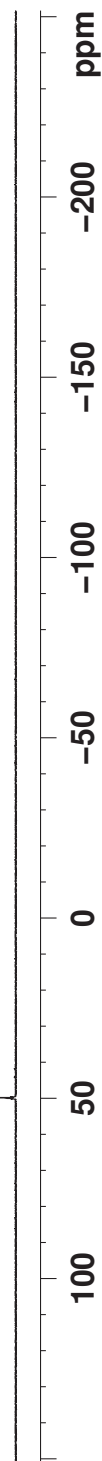

```

NAME      110123
EXPNO    1
PROCNO   1
Date_    20110223
Time     10.59
INSTRUM spect
PROBHD   5 mm PABBO BB-
PULPROG zg30
TD       65536
SOLVENT  CDCl3
NS       8
DS       2
SWH      6188.119 Hz
FIDRES   0.094423 Hz
AQ       5.2955587 sec
RG       32
DM       80.800 usec
DE       6.50 usec
TE       286.8 K
D1       1.00000000 sec
TD0      1

===== CHANNEL f1 =====
NUC1     1H
P1       11.80 usec
PL1      0.00 dB
FLLW     11.5546796 W
SFO1     300.1318534 MHz
SI       32768
SF       300.1299938 MHz
WDW      EM
SSE      0
LB       0.30 Hz
GB       0
PC       1.00
    
```

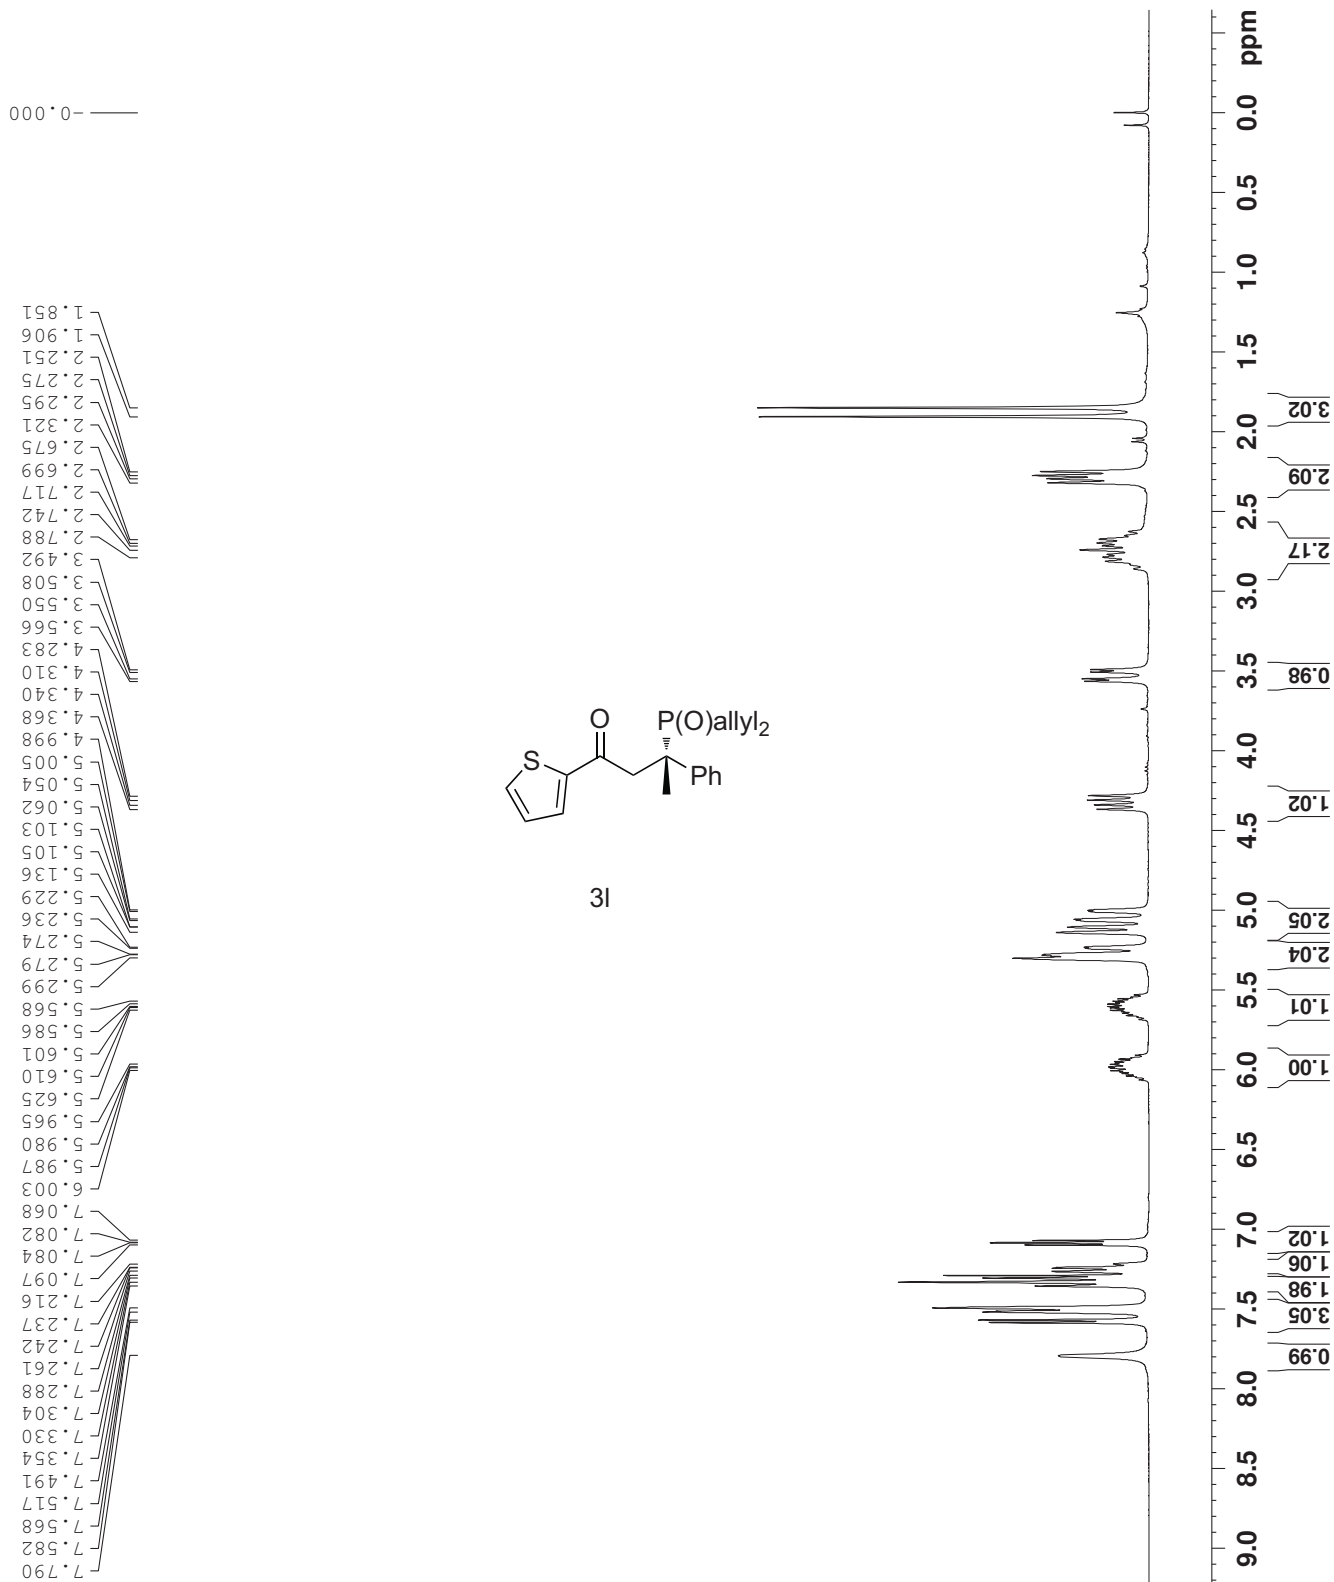



```

NAME 110123
EXPNO 3
PROCNO 1
Date_ 20110223
Time 11.29
INSTRUM spect
PROBHD 5 mm PABBO BB-
PULPROG zgpg30
TD 65536
SOLVENT CDC13
NS 380
DS 4
SWH 18028.846 Hz
FIDRES 0.275098 Hz
AQ 1.8175818 sec
RG 203
DW 27.733 usec
DE 6.50 usec
TE 287.7 K
D1 2.00000000 sec
D11 0.03000000 sec
TD0 1

===== CHANNEL f1 =====
NUC1 13C
P1 9.70 usec
PL1 0.00 dB
PL1W 29.38907051 W
SF01 75.4752953 MHz

===== CHANNEL f2 =====
CPDPRG2 waltz16
NUC2 1H
PCPD2 80.00 usec
PL2 1.00 dB
PL12 17.00 dB
PL13 17.00 dB
PL1W 9.17820644 W
PL2W 0.23054813 W
PL13W 0.23054813 W
SF02 300.1312005 MHz
SI 32768
ST 75.4677596 MHz
WDW EM
SSB 0
LB 1.00 Hz
GB 0
PC 1.40
    
```

19.24  
 30.16  
 30.64  
 30.99  
 31.42  
 43.02  
 43.52  
 44.28

76.57  
 77.00  
 77.42

120.09  
 120.24  
 120.40  
 120.55  
 126.94  
 126.98  
 127.04  
 127.74  
 127.85  
 128.05  
 128.20  
 128.31  
 128.42  
 128.45  
 132.18  
 133.78  
 138.87  
 138.93  
 144.72  
 144.75

189.31  
 189.12

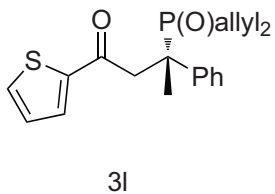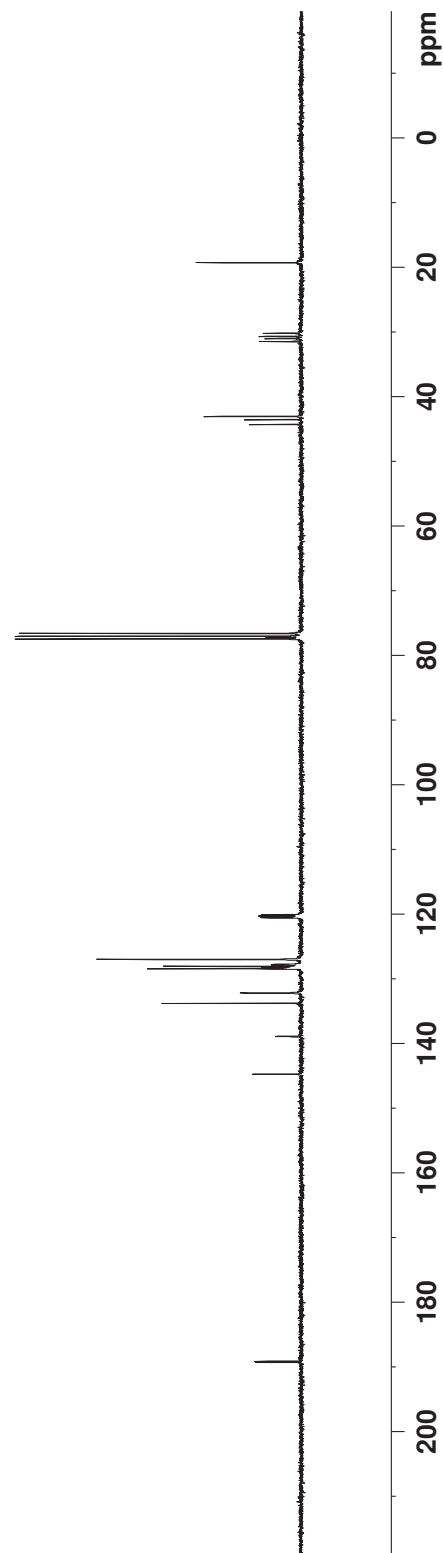

```
NAME 110123
EXPNO 2
PROCNO 1
Date_ 20110223
Time_ 11.02
INSTRUM spect
PROBHD 5 mm PABBO BB-
PULPROG zgpg30
TD 65536
SOLVENT CDCl3
NS 16
DS 4
SWH 49019.609 Hz
FIDRES 0.747980 Hz
AQ 0.6685172 sec
RG 203
DW 10.200 usec
DE 6.50 usec
TE 287.3 K
D1 2.0000000 sec
D11 0.0300000 sec
TDO 1

===== CHANNEL f1 =====
NUC1 31P
P1 9.10 usec
PL1 0.00 dB
PLI1 36.92473221 W
SFO1 121.4887762 MHz

===== CHANNEL f2 =====
CPDPRG2 waltz16
NUC2 1H
PCPD2 80.00 usec
PL2 1.00 dB
PLI2 17.00 dB
PLI3 17.00 dB
PLI2W 9.17820644 W
PLI3W 0.23054613 W
SFO2 300.1312005 MHz
SI 32768
SF 121.4948510 MHz
WDM EM
SSB 0
LB 1.00 Hz
GB 0
PC 1.40
```

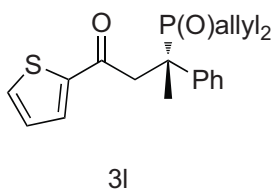

50.30

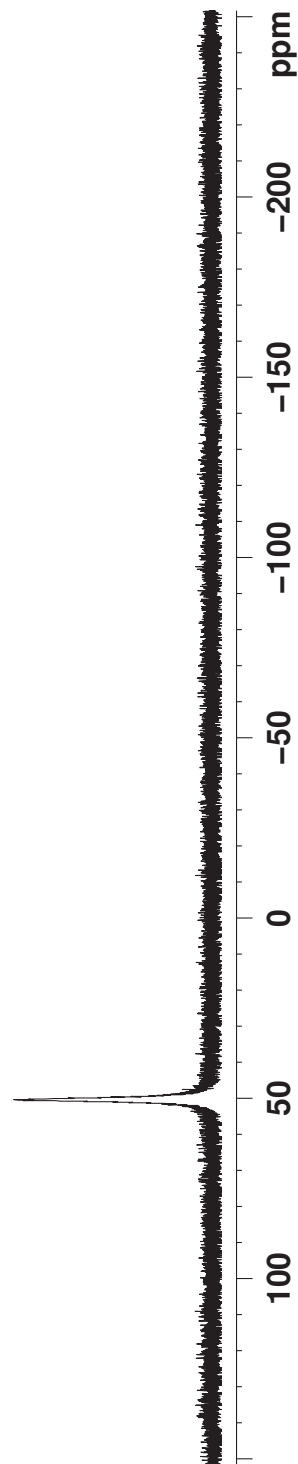

```

NAME      110223
EXPNO    1
PROCNO   1
Date_    20110223
Time     13.21
INSTRUM spect
PROBHD   5 mm PABBO BB-
PULPROG zg30
TD       65536
SOLVENT  CDCl3
NS       8
DS       2
SWH      6188.119 Hz
FIDRES   0.094423 Hz
AQ       5.2953587 sec
RG       28.5
DW       80.800 usec
DE       6.50 usec
TE       286.9 K
D1       1.00000000 sec
TD0      1

===== CHANNEL f1 =====
NUC1     1H
P1       11.80 usec
PL1     0.00 dB
PL1W    11.55467796 W
SFO1    300.1318534 MHz
SI      32768
SF      300.1299910 MHz
WDW     EM
SSB     0
LB      0.30 Hz
GB      0
PC      1.00
    
```

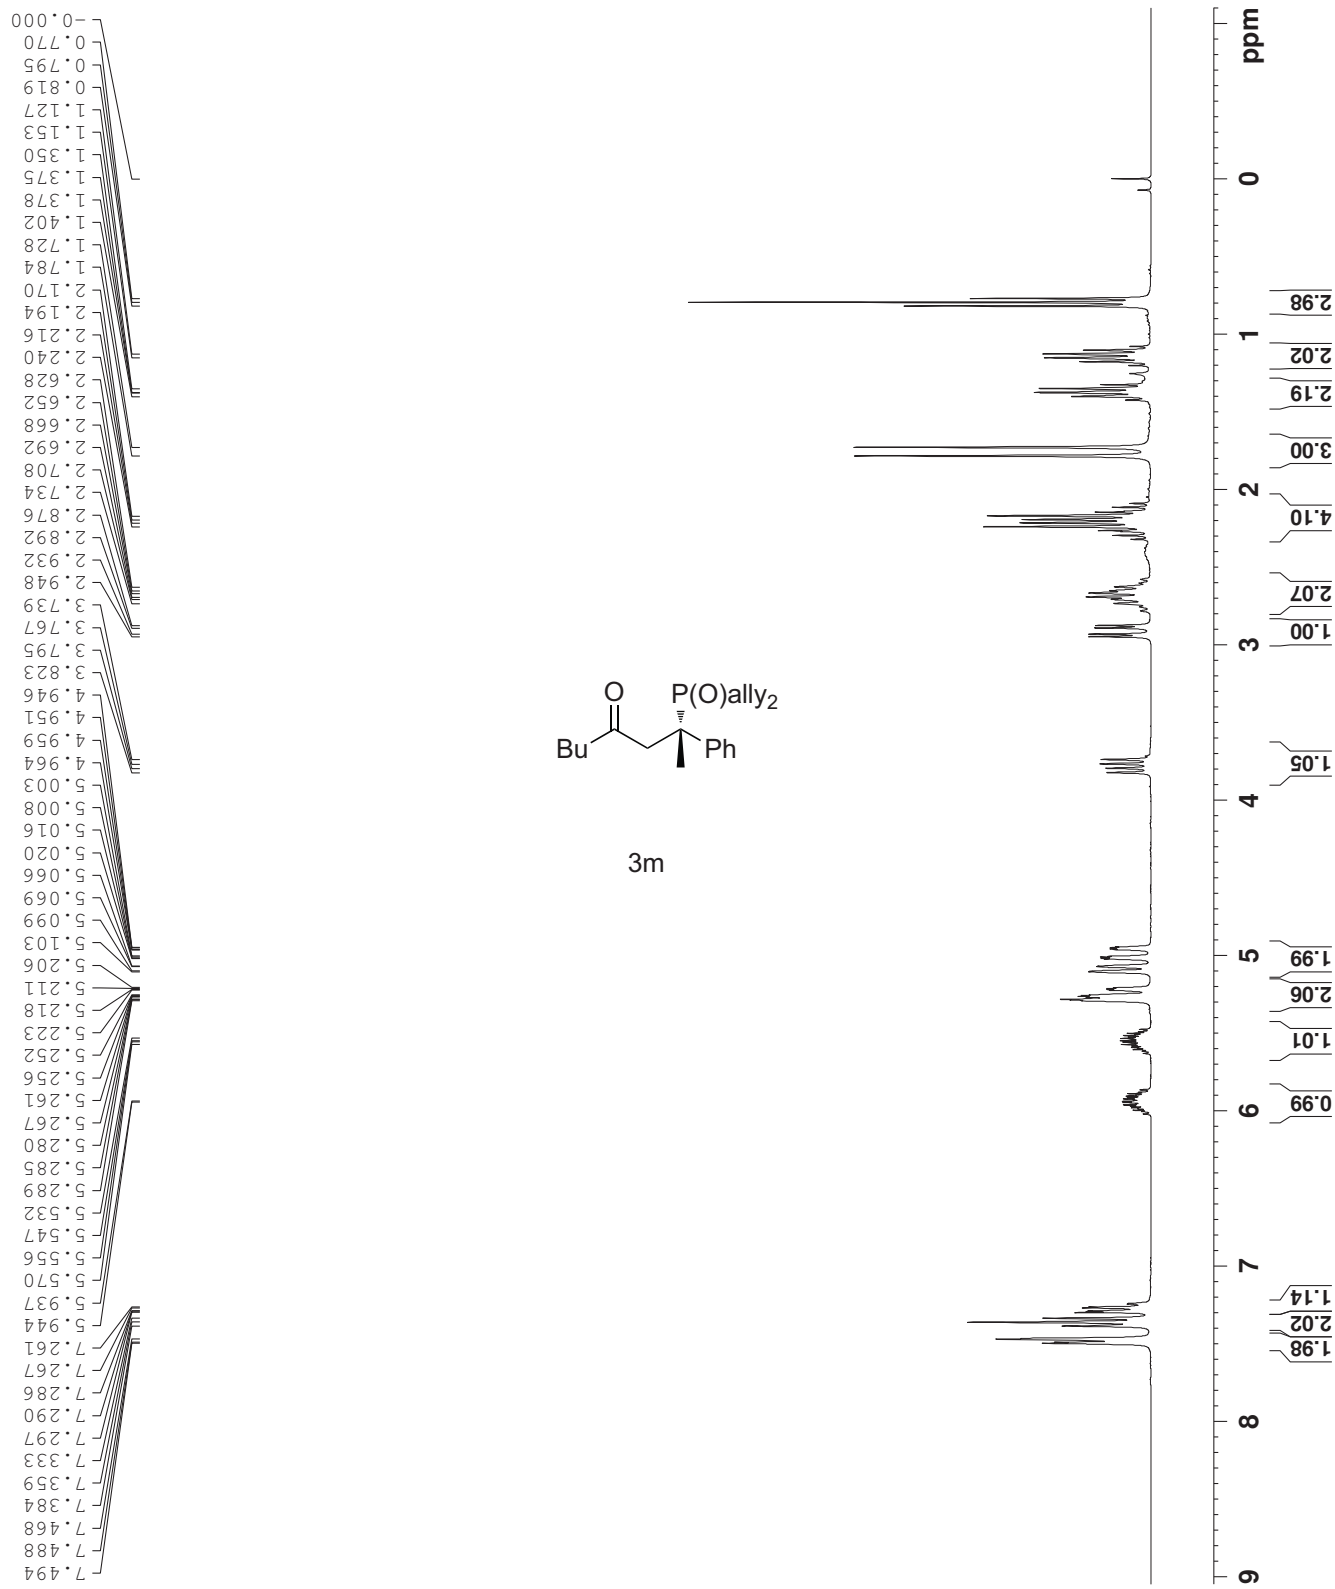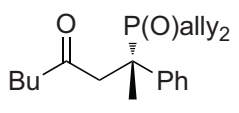

```

NAME 110223
EXPNO 2
PROCNO 1
Date_ 20110223
Time 13.55
INSTRUM spect
PROBHD 5 mm PABBO BB-
PULPROG zgpg30
TD 65536
SOLVENT CDC13
NS 466
DS 4
SWH 18028.846 Hz
FIDRES 0.275098 Hz
AQ 1.8175818 sec
RG 203
DW 27.733 usec
DE 6.50 usec
TE 287.8 K
D1 2.00000000 sec
D11 0.03000000 sec
TD0 1

===== CHANNEL f1 =====
NUC1 13C
P1 9.70 usec
PL1 0.00 dB
PL1W 29.38907051 W
SF01 75.4752953 MHz

===== CHANNEL f2 =====
CPDPRG2 waltz16
NUC2 1H
PCPD2 80.00 usec
PL2 1.00 dB
PL12 17.00 dB
PL13 17.00 dB
PL14 17.00 dB
PL15 17.00 dB
PL16 17.00 dB
PL17 17.00 dB
PL18 17.00 dB
PL19 17.00 dB
PL20 17.00 dB
PL21 17.00 dB
PL22 17.00 dB
PL23 17.00 dB
PL24 17.00 dB
PL25 17.00 dB
PL26 17.00 dB
PL27 17.00 dB
PL28 17.00 dB
PL29 17.00 dB
PL30 17.00 dB
PL31 17.00 dB
PL32 17.00 dB
PL33 17.00 dB
PL34 17.00 dB
PL35 17.00 dB
PL36 17.00 dB
PL37 17.00 dB
PL38 17.00 dB
PL39 17.00 dB
PL40 17.00 dB
PL41 17.00 dB
PL42 17.00 dB
PL43 17.00 dB
PL44 17.00 dB
PL45 17.00 dB
PL46 17.00 dB
PL47 17.00 dB
PL48 17.00 dB
PL49 17.00 dB
PL50 17.00 dB
PL51 17.00 dB
PL52 17.00 dB
PL53 17.00 dB
PL54 17.00 dB
PL55 17.00 dB
PL56 17.00 dB
PL57 17.00 dB
PL58 17.00 dB
PL59 17.00 dB
PL60 17.00 dB
PL61 17.00 dB
PL62 17.00 dB
PL63 17.00 dB
PL64 17.00 dB
PL65 17.00 dB
PL66 17.00 dB
PL67 17.00 dB
PL68 17.00 dB
PL69 17.00 dB
PL70 17.00 dB
PL71 17.00 dB
PL72 17.00 dB
PL73 17.00 dB
PL74 17.00 dB
PL75 17.00 dB
PL76 17.00 dB
PL77 17.00 dB
PL78 17.00 dB
PL79 17.00 dB
PL80 17.00 dB
PL81 17.00 dB
PL82 17.00 dB
PL83 17.00 dB
PL84 17.00 dB
PL85 17.00 dB
PL86 17.00 dB
PL87 17.00 dB
PL88 17.00 dB
PL89 17.00 dB
PL90 17.00 dB
PL91 17.00 dB
PL92 17.00 dB
PL93 17.00 dB
PL94 17.00 dB
PL95 17.00 dB
PL96 17.00 dB
PL97 17.00 dB
PL98 17.00 dB
PL99 17.00 dB
PL100 17.00 dB
PL101 17.00 dB
PL102 17.00 dB
PL103 17.00 dB
PL104 17.00 dB
PL105 17.00 dB
PL106 17.00 dB
PL107 17.00 dB
PL108 17.00 dB
PL109 17.00 dB
PL110 17.00 dB
PL111 17.00 dB
PL112 17.00 dB
PL113 17.00 dB
PL114 17.00 dB
PL115 17.00 dB
PL116 17.00 dB
PL117 17.00 dB
PL118 17.00 dB
PL119 17.00 dB
PL120 17.00 dB
PL121 17.00 dB
PL122 17.00 dB
PL123 17.00 dB
PL124 17.00 dB
PL125 17.00 dB
PL126 17.00 dB
PL127 17.00 dB
PL128 17.00 dB
PL129 17.00 dB
PL130 17.00 dB
PL131 17.00 dB
PL132 17.00 dB
PL133 17.00 dB
PL134 17.00 dB
PL135 17.00 dB
PL136 17.00 dB
PL137 17.00 dB
PL138 17.00 dB
PL139 17.00 dB
PL140 17.00 dB
PL141 17.00 dB
PL142 17.00 dB
PL143 17.00 dB
PL144 17.00 dB
PL145 17.00 dB
PL146 17.00 dB
PL147 17.00 dB
PL148 17.00 dB
PL149 17.00 dB
PL150 17.00 dB
PL151 17.00 dB
PL152 17.00 dB
PL153 17.00 dB
PL154 17.00 dB
PL155 17.00 dB
PL156 17.00 dB
PL157 17.00 dB
PL158 17.00 dB
PL159 17.00 dB
PL160 17.00 dB
PL161 17.00 dB
PL162 17.00 dB
PL163 17.00 dB
PL164 17.00 dB
PL165 17.00 dB
PL166 17.00 dB
PL167 17.00 dB
PL168 17.00 dB
PL169 17.00 dB
PL170 17.00 dB
PL171 17.00 dB
PL172 17.00 dB
PL173 17.00 dB
PL174 17.00 dB
PL175 17.00 dB
PL176 17.00 dB
PL177 17.00 dB
PL178 17.00 dB
PL179 17.00 dB
PL180 17.00 dB
PL181 17.00 dB
PL182 17.00 dB
PL183 17.00 dB
PL184 17.00 dB
PL185 17.00 dB
PL186 17.00 dB
PL187 17.00 dB
PL188 17.00 dB
PL189 17.00 dB
PL190 17.00 dB
PL191 17.00 dB
PL192 17.00 dB
PL193 17.00 dB
PL194 17.00 dB
PL195 17.00 dB
PL196 17.00 dB
PL197 17.00 dB
PL198 17.00 dB
PL199 17.00 dB
PL200 17.00 dB
PL201 17.00 dB
PL202 17.00 dB
PL203 17.00 dB
PL204 17.00 dB
PL205 17.00 dB
PL206 17.00 dB
PL207 17.00 dB
PL208 17.00 dB
PL209 17.00 dB
PL210 17.00 dB
PL211 17.00 dB
PL212 17.00 dB
PL213 17.00 dB
PL214 17.00 dB
PL215 17.00 dB
PL216 17.00 dB
PL217 17.00 dB
PL218 17.00 dB
PL219 17.00 dB
PL220 17.00 dB
PL221 17.00 dB
PL222 17.00 dB
PL223 17.00 dB
PL224 17.00 dB
PL225 17.00 dB
PL226 17.00 dB
PL227 17.00 dB
PL228 17.00 dB
PL229 17.00 dB
PL230 17.00 dB
PL231 17.00 dB
PL232 17.00 dB
PL233 17.00 dB
PL234 17.00 dB
PL235 17.00 dB
PL236 17.00 dB
PL237 17.00 dB
PL238 17.00 dB
PL239 17.00 dB
PL240 17.00 dB
PL241 17.00 dB
PL242 17.00 dB
PL243 17.00 dB
PL244 17.00 dB
PL245 17.00 dB
PL246 17.00 dB
PL247 17.00 dB
PL248 17.00 dB
PL249 17.00 dB
PL250 17.00 dB
PL251 17.00 dB
PL252 17.00 dB
PL253 17.00 dB
PL254 17.00 dB
PL255 17.00 dB
PL256 17.00 dB
PL257 17.00 dB
PL258 17.00 dB
PL259 17.00 dB
PL260 17.00 dB
PL261 17.00 dB
PL262 17.00 dB
PL263 17.00 dB
PL264 17.00 dB
PL265 17.00 dB
PL266 17.00 dB
PL267 17.00 dB
PL268 17.00 dB
PL269 17.00 dB
PL270 17.00 dB
PL271 17.00 dB
PL272 17.00 dB
PL273 17.00 dB
PL274 17.00 dB
PL275 17.00 dB
PL276 17.00 dB
PL277 17.00 dB
PL278 17.00 dB
PL279 17.00 dB
PL280 17.00 dB
PL281 17.00 dB
PL282 17.00 dB
PL283 17.00 dB
PL284 17.00 dB
PL285 17.00 dB
PL286 17.00 dB
PL287 17.00 dB
PL288 17.00 dB
PL289 17.00 dB
PL290 17.00 dB
PL291 17.00 dB
PL292 17.00 dB
PL293 17.00 dB
PL294 17.00 dB
PL295 17.00 dB
PL296 17.00 dB
PL297 17.00 dB
PL298 17.00 dB
PL299 17.00 dB
PL300 17.00 dB
PL301 17.00 dB
PL302 17.00 dB
PL303 17.00 dB
PL304 17.00 dB
PL305 17.00 dB
PL306 17.00 dB
PL307 17.00 dB
PL308 17.00 dB
PL309 17.00 dB
PL310 17.00 dB
PL311 17.00 dB
PL312 17.00 dB
PL313 17.00 dB
PL314 17.00 dB
PL315 17.00 dB
PL316 17.00 dB
PL317 17.00 dB
PL318 17.00 dB
PL319 17.00 dB
PL320 17.00 dB
PL321 17.00 dB
PL322 17.00 dB
PL323 17.00 dB
PL324 17.00 dB
PL325 17.00 dB
PL326 17.00 dB
PL327 17.00 dB
PL328 17.00 dB
PL329 17.00 dB
PL330 17.00 dB
PL331 17.00 dB
PL332 17.00 dB
PL333 17.00 dB
PL334 17.00 dB
PL335 17.00 dB
PL336 17.00 dB
PL337 17.00 dB
PL338 17.00 dB
PL339 17.00 dB
PL340 17.00 dB
PL341 17.00 dB
PL342 17.00 dB
PL343 17.00 dB
PL344 17.00 dB
PL345 17.00 dB
PL346 17.00 dB
PL347 17.00 dB
PL348 17.00 dB
PL349 17.00 dB
PL350 17.00 dB
PL351 17.00 dB
PL352 17.00 dB
PL353 17.00 dB
PL354 17.00 dB
PL355 17.00 dB
PL356 17.00 dB
PL357 17.00 dB
PL358 17.00 dB
PL359 17.00 dB
PL360 17.00 dB
PL361 17.00 dB
PL362 17.00 dB
PL363 17.00 dB
PL364 17.00 dB
PL365 17.00 dB
PL366 17.00 dB
PL367 17.00 dB
PL368 17.00 dB
PL369 17.00 dB
PL370 17.00 dB
PL371 17.00 dB
PL372 17.00 dB
PL373 17.00 dB
PL374 17.00 dB
PL375 17.00 dB
PL376 17.00 dB
PL377 17.00 dB
PL378 17.00 dB
PL379 17.00 dB
PL380 17.00 dB
PL381 17.00 dB
PL382 17.00 dB
PL383 17.00 dB
PL384 17.00 dB
PL385 17.00 dB
PL386 17.00 dB
PL387 17.00 dB
PL388 17.00 dB
PL389 17.00 dB
PL390 17.00 dB
PL391 17.00 dB
PL392 17.00 dB
PL393 17.00 dB
PL394 17.00 dB
PL395 17.00 dB
PL396 17.00 dB
PL397 17.00 dB
PL398 17.00 dB
PL399 17.00 dB
PL400 17.00 dB
PL401 17.00 dB
PL402 17.00 dB
PL403 17.00 dB
PL404 17.00 dB
PL405 17.00 dB
PL406 17.00 dB
PL407 17.00 dB
PL408 17.00 dB
PL409 17.00 dB
PL410 17.00 dB
PL411 17.00 dB
PL412 17.00 dB
PL413 17.00 dB
PL414 17.00 dB
PL415 17.00 dB
PL416 17.00 dB
PL417 17.00 dB
PL418 17.00 dB
PL419 17.00 dB
PL420 17.00 dB
PL421 17.00 dB
PL422 17.00 dB
PL423 17.00 dB
PL424 17.00 dB
PL425 17.00 dB
PL426 17.00 dB
PL427 17.00 dB
PL428 17.00 dB
PL429 17.00 dB
PL430 17.00 dB
PL431 17.00 dB
PL432 17.00 dB
PL433 17.00 dB
PL434 17.00 dB
PL435 17.00 dB
PL436 17.00 dB
PL437 17.00 dB
PL438 17.00 dB
PL439 17.00 dB
PL440 17.00 dB
PL441 17.00 dB
PL442 17.00 dB
PL443 17.00 dB
PL444 17.00 dB
PL445 17.00 dB
PL446 17.00 dB
PL447 17.00 dB
PL448 17.00 dB
PL449 17.00 dB
PL450 17.00 dB
PL451 17.00 dB
PL452 17.00 dB
PL453 17.00 dB
PL454 17.00 dB
PL455 17.00 dB
PL456 17.00 dB
PL457 17.00 dB
PL458 17.00 dB
PL459 17.00 dB
PL460 17.00 dB
PL461 17.00 dB
PL462 17.00 dB
PL463 17.00 dB
PL464 17.00 dB
PL465 17.00 dB
PL466 17.00 dB
PL467 17.00 dB
PL468 17.00 dB
PL469 17.00 dB
PL470 17.00 dB
PL471 17.00 dB
PL472 17.00 dB
PL473 17.00 dB
PL474 17.00 dB
PL475 17.00 dB
PL476 17.00 dB
PL477 17.00 dB
PL478 17.00 dB
PL479 17.00 dB
PL480 17.00 dB
PL481 17.00 dB
PL482 17.00 dB
PL483 17.00 dB
PL484 17.00 dB
PL485 17.00 dB
PL486 17.00 dB
PL487 17.00 dB
PL488 17.00 dB
PL489 17.00 dB
PL490 17.00 dB
PL491 17.00 dB
PL492 17.00 dB
PL493 17.00 dB
PL494 17.00 dB
PL495 17.00 dB
PL496 17.00 dB
PL497 17.00 dB
PL498 17.00 dB
PL499 17.00 dB
PL500 17.00 dB
    
```

46.73  
44.10  
44.08  
43.86  
43.11  
31.54  
31.18  
30.76  
30.36  
25.41  
21.97  
19.03  
13.66

77.42  
77.00  
76.58

139.13  
139.08  
128.48  
128.45  
128.31  
127.98  
127.87  
127.87  
127.01  
126.95  
120.37  
120.23  
120.04  
119.89

207.71  
207.53

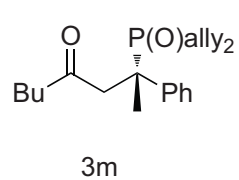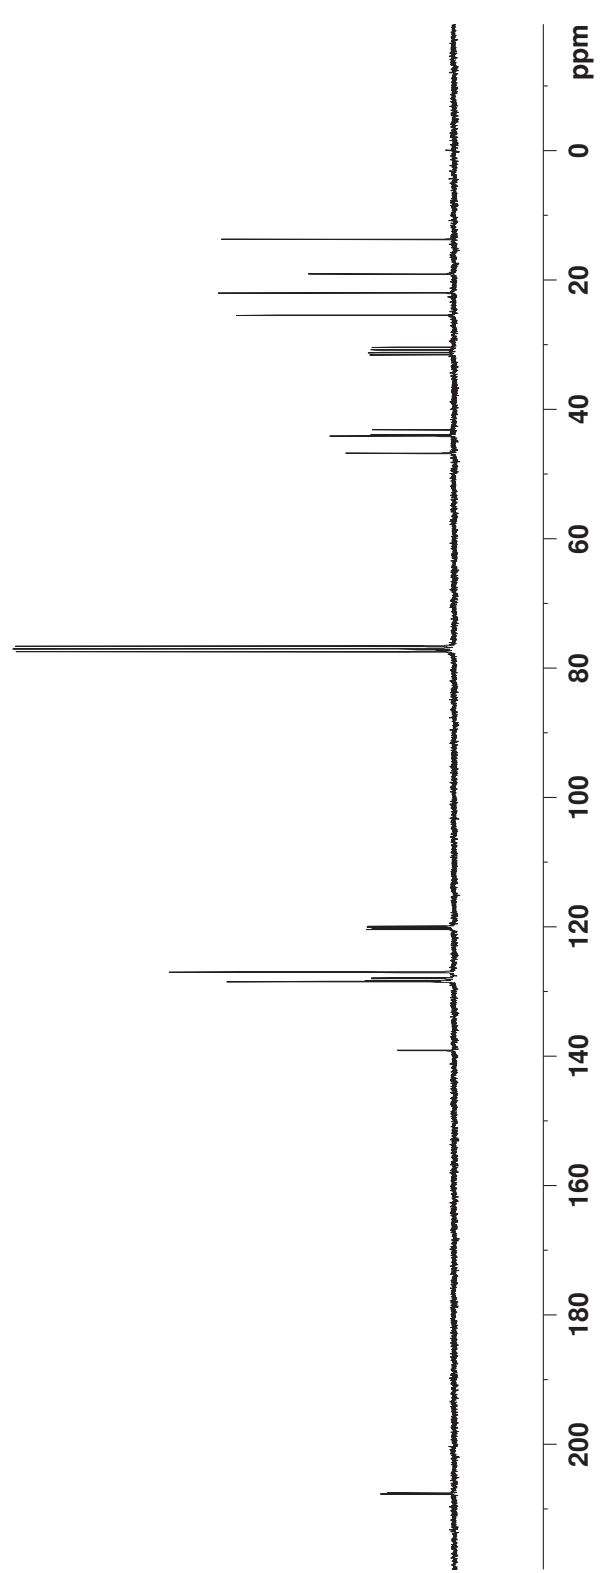

```

NAME          110223
EXPNO         3
PROCNO        1
Date_         20110223
Time_         13.59
INSTRUM       spect
PROBHD        5 mm PABBO BB-
PULPROG       zgpg30
TD            65536
SOLVENT       CDCl3
NS            16
DS            4
SWH           49019.609 Hz
FIDRES        0.747980 Hz
AQ            0.6685172 sec
RG            203
DW            10.200 usec
DE            6.50 usec
TE            287.3 K
D1            2.0000000 sec
D11           0.0300000 sec
TD0           1

===== CHANNEL f1 =====
NUC1          31P
P1            9.10 usec
PL1           0.00 dB
PL1W          36.92473221 W
SFO1          121.4887762 MHz

===== CHANNEL f2 =====
CPDPRG2       waltz16
NUC2          1H
PCPD2         80.00 usec
PL2           1.00 dB
PL12          17.00 dB
PL13          17.00 dB
PL12W         9.17820644 W
PL13W         0.23054613 W
SFO2          300.1312005 MHz
SI            32768
SF            121.4948510 MHz
WDM           EM
SSB           0
LB            1.00 Hz
GB            0
PC            1.40
    
```

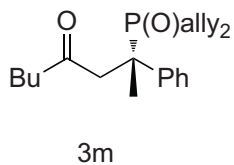

49.42

100 50 0 -50 -100 -150 -200 ppm

```

NAME      110309
EXPNO    5
PROCNO   1
Date_    20110309
Time     18.57
INSTRUM spect
PROBHD   5 mm FAPBBO BB-
PULPROG zg30
TD       65536
SOLVENT  CDCl3
NS       8
DS       2
SWH      6188.119 Hz
FIDRES   0.094423 Hz
AQ       5.2953587 sec
RG       85.2
DM       80.800 usec
DE       6.50 usec
TE       280.6 K
D1       1.00000000 sec
TD0      1

===== CHANNEL f1 =====
NUC1     1H
P1       11.80 usec
PL1      0.00 db
FLLW     11.5546736 W
SFO1     300.1318534 MHz
SI       32768
SF       300.1299937 MHz
WDW      EM
SSE      0
LB       0.30 Hz
GB       0
PC       1.00
    
```

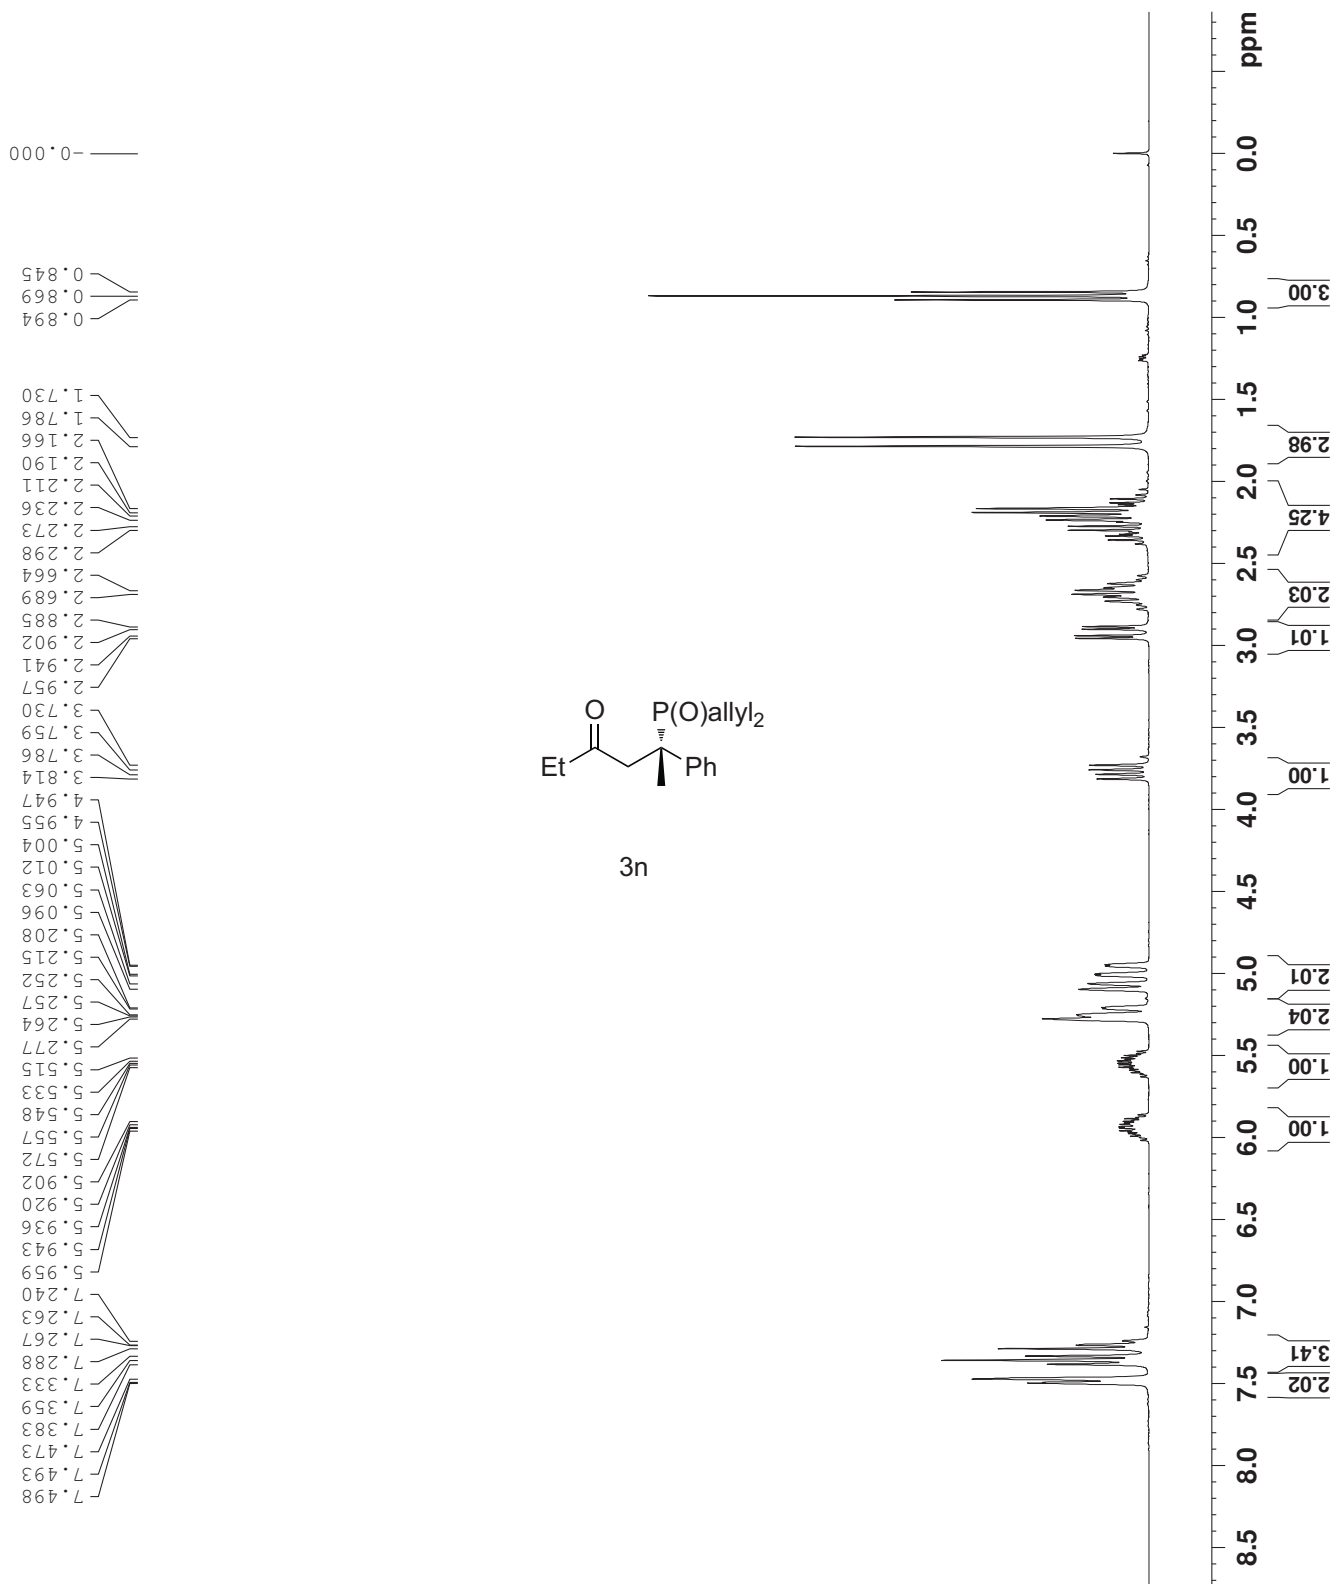

```

NAME                110309
EXPNO                4
PROCNO              1
Date_               20110309
Time                18.01
INSTRUM             spect
PROBHD              5 mm PABBO BB-
PULPROG             zgpg30
TD                  65536
SOLVENT             CDC13
NS                  148
DS                  4
SWH                 18028.846 Hz
FIDRES             0.275098 Hz
AQ                 1.8175818 sec
RG                 203
DW                 27.733 usec
DE                 6.50 usec
TE                 292.4 K
D1                 2.00000000 sec
D11                0.03000000 sec
TD0                1

===== CHANNEL f1 =====
NUC1                13C
P1                  9.70 usec
PL1                 0.00 dB
PL1W                29.38907051 W
SF01                75.4752953 MHz

===== CHANNEL f2 =====
CPDPRG2            waltz16
NUC2                1H
PCPD2              80.00 usec
PL2                 1.00 dB
PL12                17.00 dB
PL13                17.00 dB
PL1W                9.17820644 W
PL12W              0.23054813 W
PL13W              0.23054813 W
SF02                300.1312005 MHz
SI                 32768
ST                 75.4677541 MHz
WDW                EM
SSB                 0
LB                 1.00 Hz
GB                 0
PC                 1.40
    
```

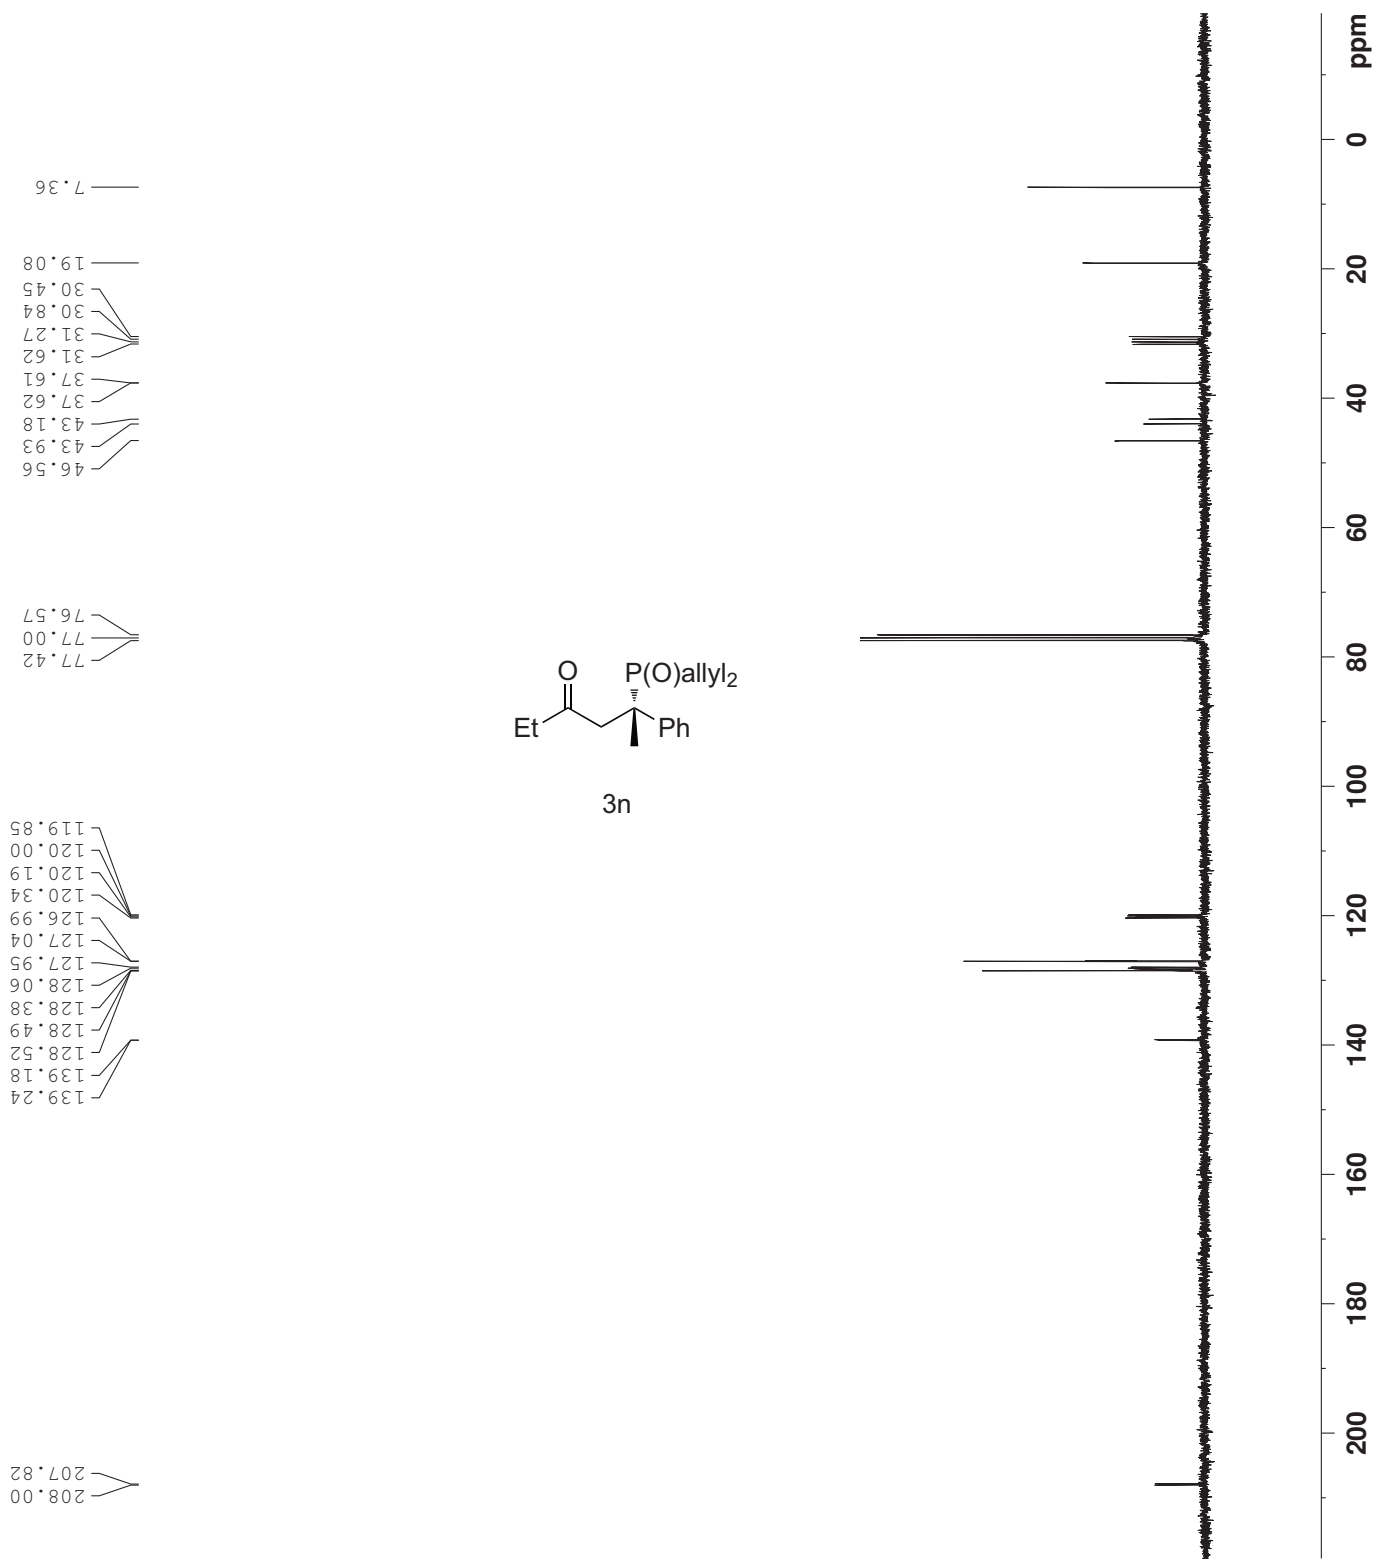

```
NAME 110309
EXPNO 6
PROCNO 1
Date_ 20110309
Time_ 19.04
INSTRUM spect
PROBHD 5 mm PABBO BB-
PULPROG zgpg30
TD 65536
SOLVENT CDCl3
NS 16
DS 4
SWH 49019.609 Hz
FIDRES 0.747980 Hz
AQ 0.6685172 sec
RG 203
DW 10.200 usec
DE 6.50 usec
TE 290.9 K
D1 2.0000000 sec
D11 0.0300000 sec
TDO 1

===== CHANNEL f1 =====
NUC1 31P
P1 9.10 usec
PL1 0.00 dB
PLI1 36.92473221 W
SFO1 121.4887762 MHz

===== CHANNEL f2 =====
CPDPRG2 waltz16
NUC2 1H
PCPD2 80.00 usec
PL2 1.00 dB
PLI2 17.00 dB
PLI3 17.00 dB
PL12W 9.17820644 W
PL13W 0.23054613 W
SFO2 300.1312005 MHz
SI 32768
SF 121.4948510 MHz
WDM EM
SSB 0
LB 1.00 Hz
GB 0
PC 1.40
```

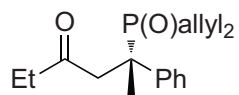

3n

49.24

100 50 0 -50 -100 -150 -200 ppm



```

NAME      110224
EXPNO    8
PROCNO   1
Date_    20110224
Time     19.07
INSTRUM spect
PROBHD   5 mm FAPBBO BB
PULPROG  zg30
TD        65536
SOLVENT  CDCl3
NS        3
DS        2
SWH       6188.112 Hz
FIDRES   0.094423 Hz
AQ        5.2355567 sec
RG        26.2
DW        80.600 usec
DE        6.50 usec
TE        286.7 K
D1        1.00000000 sec
TD0       1

===== CHANNEL f1 =====
NUC1      1H
P1        11.80 usec
PL1       0.00 dB
PL12      11.55467796 W
SF01      300.1318534 MHz
SI        32768
SF        300.1299776 MHz
WDW       EM
SSB       0
LB        0.30 Hz
GB        0
PC        1.00
    
```

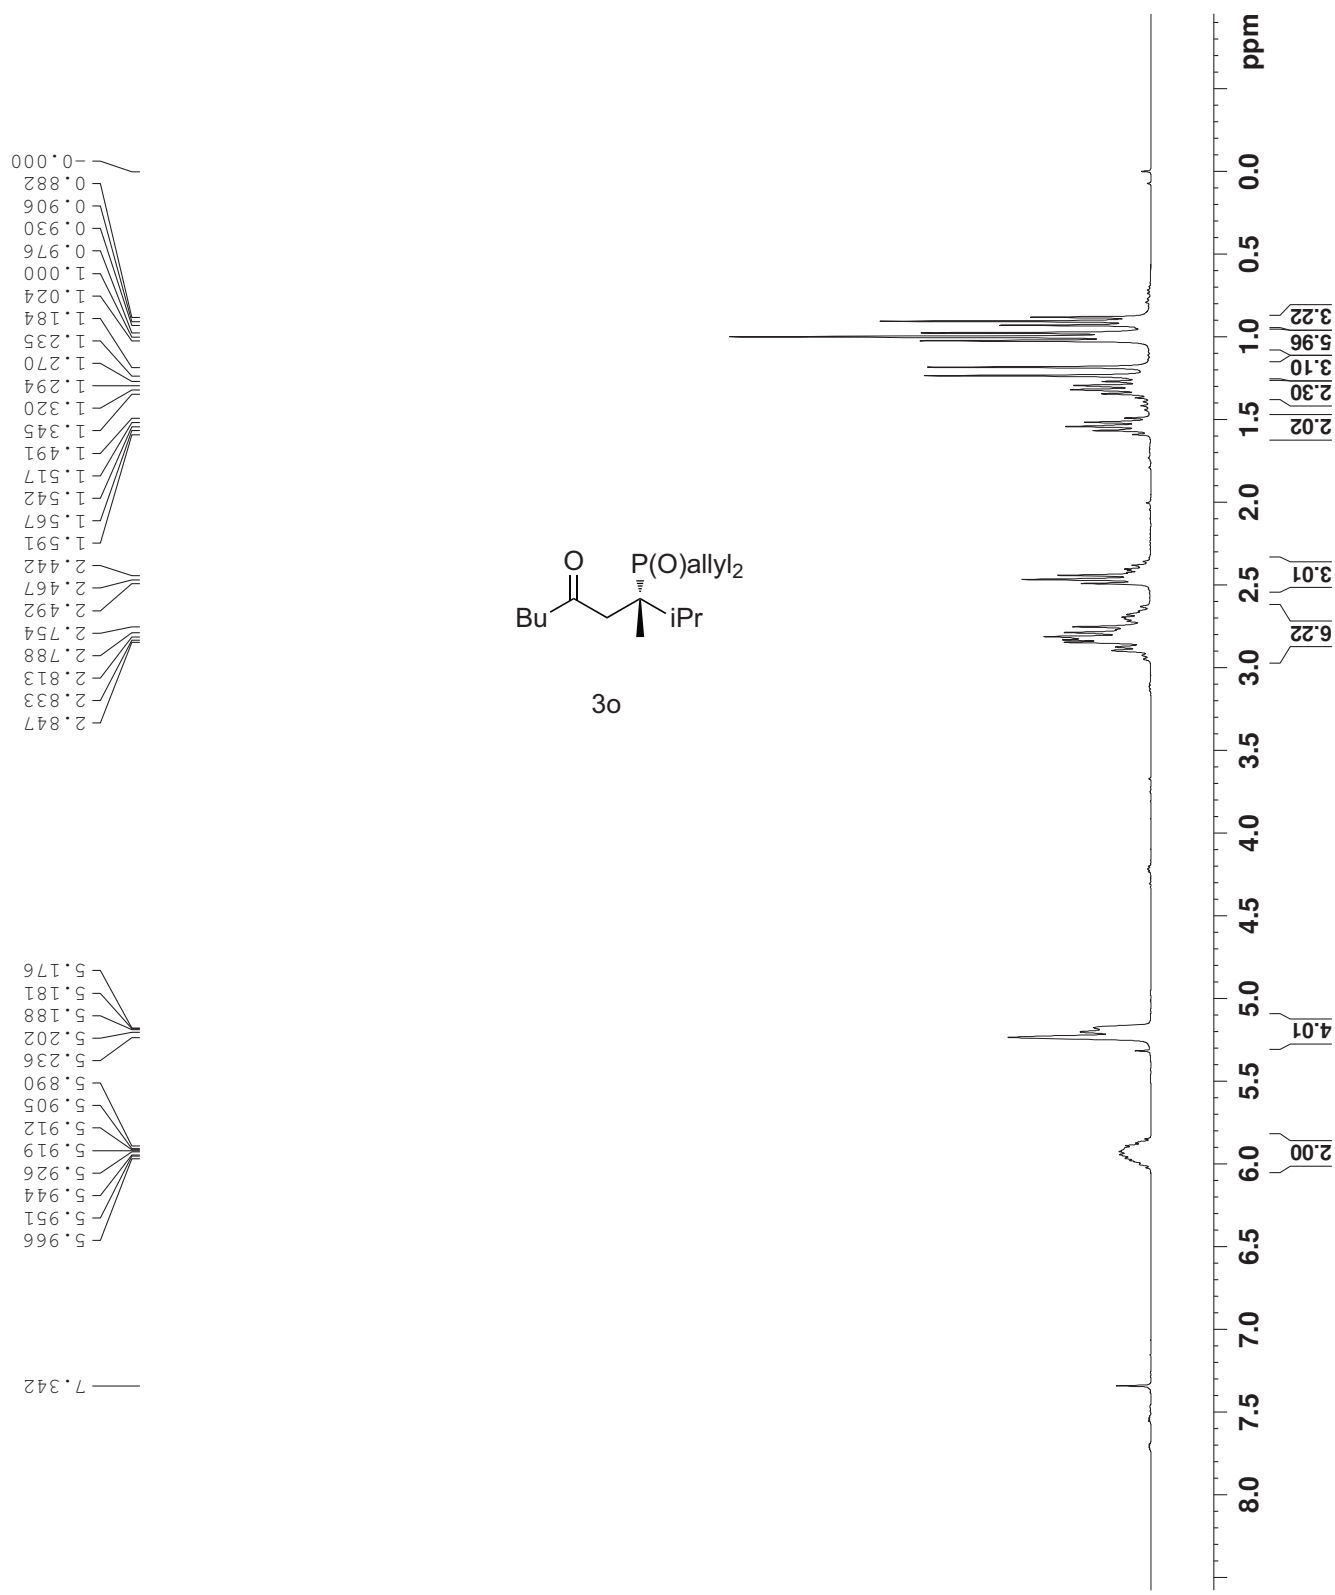

```

NAME 110224
EXPNO 6
PROCNO 1
Date_ 20110224
Time 18.58
INSTRUM spect
PROBHD 5 mm PABBO BB-
PULPROG zgpg30
TD 65536
SOLVENT CDC13
NS 1024
DS 4
SWH 18028.846 Hz
FIDRES 0.275098 Hz
AQ 1.8175818 sec
RG 203
DW 27.733 usec
DE 6.50 usec
TE 289.6 K
D1 2.00000000 sec
D11 0.03000000 sec
TD0 1

===== CHANNEL f1 =====
NUC1 13C
P1 9.70 usec
PL1 0.00 dB
PL1W 29.38907051 W
SF01 75.4752953 MHz

===== CHANNEL f2 =====
CPDPRG2 waltz16
NUC2 1H
PCPD2 80.00 usec
PL2 1.00 dB
PL12 17.00 dB
PL13 17.00 dB
PL14 17.00 dB
PL15 17.00 dB
PL16 17.00 dB
PL17 17.00 dB
PL18 17.00 dB
PL19 17.00 dB
PL20 17.00 dB
PL21 17.00 dB
PL22 17.00 dB
PL23 17.00 dB
PL24 17.00 dB
PL25 17.00 dB
PL26 17.00 dB
PL27 17.00 dB
PL28 17.00 dB
PL29 17.00 dB
PL30 17.00 dB
PL31 17.00 dB
PL32 17.00 dB
PL33 17.00 dB
PL34 17.00 dB
PL35 17.00 dB
PL36 17.00 dB
PL37 17.00 dB
PL38 17.00 dB
PL39 17.00 dB
PL40 17.00 dB
PL41 17.00 dB
PL42 17.00 dB
PL43 17.00 dB
PL44 17.00 dB
PL45 17.00 dB
PL46 17.00 dB
PL47 17.00 dB
PL48 17.00 dB
PL49 17.00 dB
PL50 17.00 dB
PL51 17.00 dB
PL52 17.00 dB
PL53 17.00 dB
PL54 17.00 dB
PL55 17.00 dB
PL56 17.00 dB
PL57 17.00 dB
PL58 17.00 dB
PL59 17.00 dB
PL60 17.00 dB
PL61 17.00 dB
PL62 17.00 dB
PL63 17.00 dB
PL64 17.00 dB
PL65 17.00 dB
PL66 17.00 dB
PL67 17.00 dB
PL68 17.00 dB
PL69 17.00 dB
PL70 17.00 dB
PL71 17.00 dB
PL72 17.00 dB
PL73 17.00 dB
PL74 17.00 dB
PL75 17.00 dB
PL76 17.00 dB
PL77 17.00 dB
PL78 17.00 dB
PL79 17.00 dB
PL80 17.00 dB
PL81 17.00 dB
PL82 17.00 dB
PL83 17.00 dB
PL84 17.00 dB
PL85 17.00 dB
PL86 17.00 dB
PL87 17.00 dB
PL88 17.00 dB
PL89 17.00 dB
PL90 17.00 dB
PL91 17.00 dB
PL92 17.00 dB
PL93 17.00 dB
PL94 17.00 dB
PL95 17.00 dB
PL96 17.00 dB
PL97 17.00 dB
PL98 17.00 dB
PL99 17.00 dB
PL100 17.00 dB
PL101 17.00 dB
PL102 17.00 dB
PL103 17.00 dB
PL104 17.00 dB
PL105 17.00 dB
PL106 17.00 dB
PL107 17.00 dB
PL108 17.00 dB
PL109 17.00 dB
PL110 17.00 dB
PL111 17.00 dB
PL112 17.00 dB
PL113 17.00 dB
PL114 17.00 dB
PL115 17.00 dB
PL116 17.00 dB
PL117 17.00 dB
PL118 17.00 dB
PL119 17.00 dB
PL120 17.00 dB
PL121 17.00 dB
PL122 17.00 dB
PL123 17.00 dB
PL124 17.00 dB
PL125 17.00 dB
PL126 17.00 dB
PL127 17.00 dB
PL128 17.00 dB
PL129 17.00 dB
PL130 17.00 dB
PL131 17.00 dB
PL132 17.00 dB
PL133 17.00 dB
PL134 17.00 dB
PL135 17.00 dB
PL136 17.00 dB
PL137 17.00 dB
PL138 17.00 dB
PL139 17.00 dB
PL140 17.00 dB
PL141 17.00 dB
PL142 17.00 dB
PL143 17.00 dB
PL144 17.00 dB
PL145 17.00 dB
PL146 17.00 dB
PL147 17.00 dB
PL148 17.00 dB
PL149 17.00 dB
PL150 17.00 dB
PL151 17.00 dB
PL152 17.00 dB
PL153 17.00 dB
PL154 17.00 dB
PL155 17.00 dB
PL156 17.00 dB
PL157 17.00 dB
PL158 17.00 dB
PL159 17.00 dB
PL160 17.00 dB
PL161 17.00 dB
PL162 17.00 dB
PL163 17.00 dB
PL164 17.00 dB
PL165 17.00 dB
PL166 17.00 dB
PL167 17.00 dB
PL168 17.00 dB
PL169 17.00 dB
PL170 17.00 dB
PL171 17.00 dB
PL172 17.00 dB
PL173 17.00 dB
PL174 17.00 dB
PL175 17.00 dB
PL176 17.00 dB
PL177 17.00 dB
PL178 17.00 dB
PL179 17.00 dB
PL180 17.00 dB
PL181 17.00 dB
PL182 17.00 dB
PL183 17.00 dB
PL184 17.00 dB
PL185 17.00 dB
PL186 17.00 dB
PL187 17.00 dB
PL188 17.00 dB
PL189 17.00 dB
PL190 17.00 dB
PL191 17.00 dB
PL192 17.00 dB
PL193 17.00 dB
PL194 17.00 dB
PL195 17.00 dB
PL196 17.00 dB
PL197 17.00 dB
PL198 17.00 dB
PL199 17.00 dB
PL200 17.00 dB
PL201 17.00 dB
PL202 17.00 dB
PL203 17.00 dB
PL204 17.00 dB
PL205 17.00 dB
PL206 17.00 dB
PL207 17.00 dB
PL208 17.00 dB
PL209 17.00 dB
PL210 17.00 dB
PL211 17.00 dB
PL212 17.00 dB
PL213 17.00 dB
PL214 17.00 dB
PL215 17.00 dB
PL216 17.00 dB
PL217 17.00 dB
PL218 17.00 dB
PL219 17.00 dB
PL220 17.00 dB
PL221 17.00 dB
PL222 17.00 dB
PL223 17.00 dB
PL224 17.00 dB
PL225 17.00 dB
PL226 17.00 dB
PL227 17.00 dB
PL228 17.00 dB
PL229 17.00 dB
PL230 17.00 dB
PL231 17.00 dB
PL232 17.00 dB
PL233 17.00 dB
PL234 17.00 dB
PL235 17.00 dB
PL236 17.00 dB
PL237 17.00 dB
PL238 17.00 dB
PL239 17.00 dB
PL240 17.00 dB
PL241 17.00 dB
PL242 17.00 dB
PL243 17.00 dB
PL244 17.00 dB
PL245 17.00 dB
PL246 17.00 dB
PL247 17.00 dB
PL248 17.00 dB
PL249 17.00 dB
PL250 17.00 dB
PL251 17.00 dB
PL252 17.00 dB
PL253 17.00 dB
PL254 17.00 dB
PL255 17.00 dB
PL256 17.00 dB
PL257 17.00 dB
PL258 17.00 dB
PL259 17.00 dB
PL260 17.00 dB
PL261 17.00 dB
PL262 17.00 dB
PL263 17.00 dB
PL264 17.00 dB
PL265 17.00 dB
PL266 17.00 dB
PL267 17.00 dB
PL268 17.00 dB
PL269 17.00 dB
PL270 17.00 dB
PL271 17.00 dB
PL272 17.00 dB
PL273 17.00 dB
PL274 17.00 dB
PL275 17.00 dB
PL276 17.00 dB
PL277 17.00 dB
PL278 17.00 dB
PL279 17.00 dB
PL280 17.00 dB
PL281 17.00 dB
PL282 17.00 dB
PL283 17.00 dB
PL284 17.00 dB
PL285 17.00 dB
PL286 17.00 dB
PL287 17.00 dB
PL288 17.00 dB
PL289 17.00 dB
PL290 17.00 dB
PL291 17.00 dB
PL292 17.00 dB
PL293 17.00 dB
PL294 17.00 dB
PL295 17.00 dB
PL296 17.00 dB
PL297 17.00 dB
PL298 17.00 dB
PL299 17.00 dB
PL300 17.00 dB
PL301 17.00 dB
PL302 17.00 dB
PL303 17.00 dB
PL304 17.00 dB
PL305 17.00 dB
PL306 17.00 dB
PL307 17.00 dB
PL308 17.00 dB
PL309 17.00 dB
PL310 17.00 dB
PL311 17.00 dB
PL312 17.00 dB
PL313 17.00 dB
PL314 17.00 dB
PL315 17.00 dB
PL316 17.00 dB
PL317 17.00 dB
PL318 17.00 dB
PL319 17.00 dB
PL320 17.00 dB
PL321 17.00 dB
PL322 17.00 dB
PL323 17.00 dB
PL324 17.00 dB
PL325 17.00 dB
PL326 17.00 dB
PL327 17.00 dB
PL328 17.00 dB
PL329 17.00 dB
PL330 17.00 dB
PL331 17.00 dB
PL332 17.00 dB
PL333 17.00 dB
PL334 17.00 dB
PL335 17.00 dB
PL336 17.00 dB
PL337 17.00 dB
PL338 17.00 dB
PL339 17.00 dB
PL340 17.00 dB
PL341 17.00 dB
PL342 17.00 dB
PL343 17.00 dB
PL344 17.00 dB
PL345 17.00 dB
PL346 17.00 dB
PL347 17.00 dB
PL348 17.00 dB
PL349 17.00 dB
PL350 17.00 dB
PL351 17.00 dB
PL352 17.00 dB
PL353 17.00 dB
PL354 17.00 dB
PL355 17.00 dB
PL356 17.00 dB
PL357 17.00 dB
PL358 17.00 dB
PL359 17.00 dB
PL360 17.00 dB
PL361 17.00 dB
PL362 17.00 dB
PL363 17.00 dB
PL364 17.00 dB
PL365 17.00 dB
PL366 17.00 dB
PL367 17.00 dB
PL368 17.00 dB
PL369 17.00 dB
PL370 17.00 dB
PL371 17.00 dB
PL372 17.00 dB
PL373 17.00 dB
PL374 17.00 dB
PL375 17.00 dB
PL376 17.00 dB
PL377 17.00 dB
PL378 17.00 dB
PL379 17.00 dB
PL380 17.00 dB
PL381 17.00 dB
PL382 17.00 dB
PL383 17.00 dB
PL384 17.00 dB
PL385 17.00 dB
PL386 17.00 dB
PL387 17.00 dB
PL388 17.00 dB
PL389 17.00 dB
PL390 17.00 dB
PL391 17.00 dB
PL392 17.00 dB
PL393 17.00 dB
PL394 17.00 dB
PL395 17.00 dB
PL396 17.00 dB
PL397 17.00 dB
PL398 17.00 dB
PL399 17.00 dB
PL400 17.00 dB
PL401 17.00 dB
PL402 17.00 dB
PL403 17.00 dB
PL404 17.00 dB
PL405 17.00 dB
PL406 17.00 dB
PL407 17.00 dB
PL408 17.00 dB
PL409 17.00 dB
PL410 17.00 dB
PL411 17.00 dB
PL412 17.00 dB
PL413 17.00 dB
PL414 17.00 dB
PL415 17.00 dB
PL416 17.00 dB
PL417 17.00 dB
PL418 17.00 dB
PL419 17.00 dB
PL420 17.00 dB
PL421 17.00 dB
PL422 17.00 dB
PL423 17.00 dB
PL424 17.00 dB
PL425 17.00 dB
PL426 17.00 dB
PL427 17.00 dB
PL428 17.00 dB
PL429 17.00 dB
PL430 17.00 dB
PL431 17.00 dB
PL432 17.00 dB
PL433 17.00 dB
PL434 17.00 dB
PL435 17.00 dB
PL436 17.00 dB
PL437 17.00 dB
PL438 17.00 dB
PL439 17.00 dB
PL440 17.00 dB
PL441 17.00 dB
PL442 17.00 dB
PL443 17.00 dB
PL444 17.00 dB
PL445 17.00 dB
PL446 17.00 dB
PL447 17.00 dB
PL448 17.00 dB
PL449 17.00 dB
PL450 17.00 dB
PL451 17.00 dB
PL452 17.00 dB
PL453 17.00 dB
PL454 17.00 dB
PL455 17.00 dB
PL456 17.00 dB
PL457 17.00 dB
PL458 17.00 dB
PL459 17.00 dB
PL460 17.00 dB
PL461 17.00 dB
PL462 17.00 dB
PL463 17.00 dB
PL464 17.00 dB
PL465 17.00 dB
PL466 17.00 dB
PL467 17.00 dB
PL468 17.00 dB
PL469 17.00 dB
PL470 17.00 dB
PL471 17.00 dB
PL472 17.00 dB
PL473 17.00 dB
PL474 17.00 dB
PL475 17.00 dB
PL476 17.00 dB
PL477 17.00 dB
PL478 17.00 dB
PL479 17.00 dB
PL480 17.00 dB
PL481 17.00 dB
PL482 17.00 dB
PL483 17.00 dB
PL484 17.00 dB
PL485 17.00 dB
PL486 17.00 dB
PL487 17.00 dB
PL488 17.00 dB
PL489 17.00 dB
PL490 17.00 dB
PL491 17.00 dB
PL492 17.00 dB
PL493 17.00 dB
PL494 17.00 dB
PL495 17.00 dB
PL496 17.00 dB
PL497 17.00 dB
PL498 17.00 dB
PL499 17.00 dB
PL500 17.00 dB
    
```

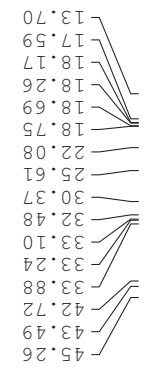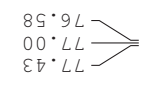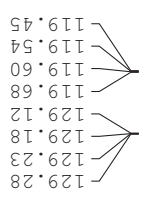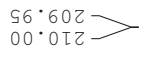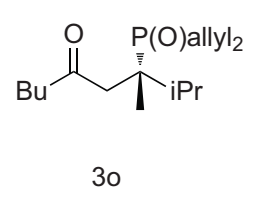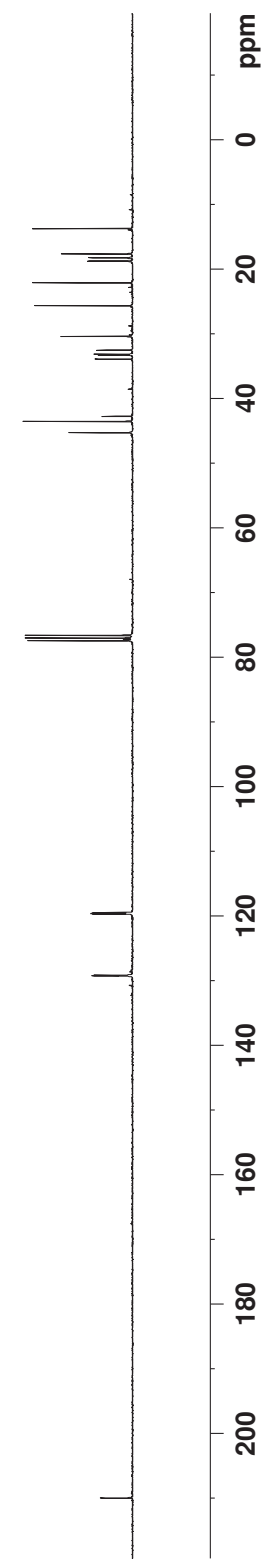

```

NAME 110224
EXPNO 7
PROCNO 1
Date_ 20110224
Time_ 19.04
INSTRUM spect
PROBHD 5 mm PABBO BB-
PULPROG zgpg30
TD 65536
SOLVENT CDCl3
NS 16
DS 4
SWH 49019.609 Hz
FIDRES 0.747980 Hz
AQ 0.6685172 sec
RG 203
DW 10.200 usec
DE 6.50 usec
TE 288.9 K
D1 2.0000000 sec
D11 0.0300000 sec
TD0 1

===== CHANNEL f1 =====
NUC1 31P
P1 9.10 usec
PL1 0.00 dB
PL1W 36.92473221 W
SFO1 121.4887762 MHz

===== CHANNEL f2 =====
CEDPRG2 waltz16
NUC2 1H
PCPD2 80.00 usec
PL2 1.00 dB
PL12 17.00 dB
PL13 17.00 dB
PL12W 9.17820644 W
PL13W 0.23054613 W
SFO2 300.1312005 MHz
SI 32768
SF 121.4948510 MHz
WDM EM
SSB 0
LB 1.00 Hz
GB 0
PC 1.40
    
```

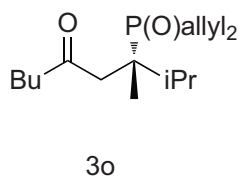

53.11

100 50 0 -50 -100 -150 -200 ppm

```

NAME      110224
EXPNO    9
PROCNO   1
Date_    20110224
Time     19.13
INSTRUM  spect
PROBHD   5 mm FAPBO BB-
PULPROG  zg30
TD        65536
SOLVENT  CDCl3
NS        2
DS        8
SWH       6188.119 Hz
FIDRES    0.094423 Hz
AQ         5.2953587 sec
RG         22.6
DW         80.800 usec
DE         6.50 usec
TE        288.4 K
D1        1.00000000 sec
TD0       1

===== CHANNEL f1 =====
NUC1      1H
P1        11.80 usec
PL1       0.00 dB
PL1W      11.55467796 W
SFO1      300.1318534 MHz
SI        32768
SF        300.1299923 MHz
WDW       EM
SSB       0
LB        0.30 Hz
GB        0
PC        1.00
    
```

0.000

1.022  
1.047  
1.071  
2.256  
2.280  
2.328  
2.378  
2.403  
2.559  
2.579  
2.593  
2.620  
2.642  
2.847  
2.870  
2.899  
2.922  
2.949  
2.972  
3.915  
3.953  
3.978  
4.015  
4.066  
4.096  
4.128  
4.158  
5.020  
5.070  
5.077  
5.081  
5.134  
5.165  
5.202  
5.226  
5.682  
5.698  
5.706  
5.722  
5.877  
7.261  
7.279  
7.283  
7.293  
7.319  
7.345  
7.369  
7.405  
7.433  
7.438  
7.463  
7.489  
7.548  
7.572  
7.597  
7.991  
7.995  
8.020

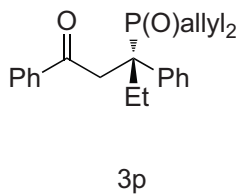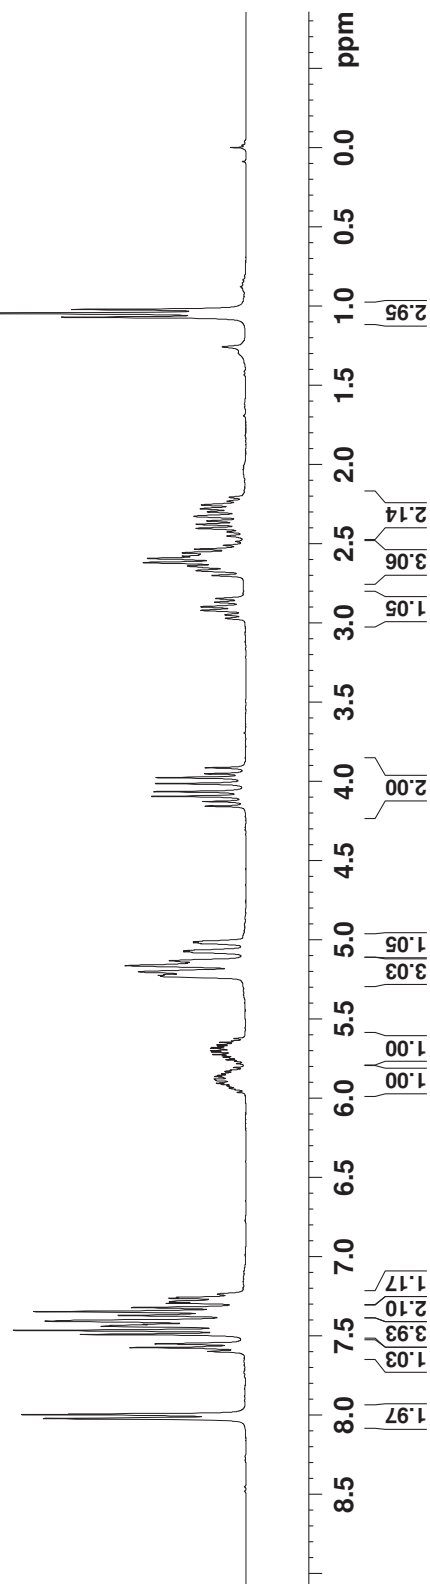



```

NAME          110224
EXPNO         10
PROCNO        1
Date_         20110224
Time_         19.16
INSTRUM       spect
PROBHD        5 mm PABBO BB-
PULPROG       zgpg30
TD            65536
SOLVENT       CDCl3
NS            16
DS            4
SWH           49019.609 Hz
FIDRES        0.747980 Hz
AQ            0.6685172 sec
RG            203
DW            10.200 usec
DE            6.50 usec
TE            288.7 K
D1            2.0000000 sec
D11           0.0300000 sec
TD0           1

===== CHANNEL f1 =====
NUC1          31P
P1            9.10 usec
PL1           0.00 dB
PL1W          36.92473221 W
SFO1          121.4887762 MHz

===== CHANNEL f2 =====
CPDPRG2       waltz16
NUC2          1H
PCPD2         80.00 usec
PL2           1.00 dB
PL12          17.00 dB
PL13          17.00 dB
PL12W         9.17820644 W
PL13W         0.23054613 W
SFO2          300.1312005 MHz
SI            32768
SF            121.4948510 MHz
WDW           EM
SSB           0
LB            1.00 Hz
GB            0
PC            1.40
    
```

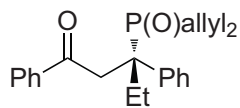

3p

50.73

100 50 0 -50 -100 -150 -200 ppm

```

NAME      110308
EXPNO     2
PROCNO    1
Date_     20110308
Time      16.56
INSTRUM   spect
PROBHD    5 mm PABBO BB-
PULPROG   zg30
TD         65536
SOLVENT   CDCl3
NS         8
DS         2
SWH        6188.119 Hz
FIDRES     0.094423 Hz
AQ         5.2953587 sec
RG         50.8
DW         80.800 usec
DE         6.50 usec
TE         288.8 K
D1         1.00000000 sec
TD0        1

===== CHANNEL f1 =====
NUC1       1H
P1         11.80 usec
PL1        0.00 dB
PL1W       11.55467796 W
SF01       300.1318534 MHz
SI         32768
SF         300.1299967 MHz
WDW        EM
SSB        0
LB         0.30 Hz
GB         0
PC         1.00
    
```

7.925  
7.900  
7.553  
7.529  
7.503  
7.490  
7.465  
7.436  
7.410  
7.385  
7.328  
7.303  
7.278  
7.229  
7.207  
7.182

4.474  
4.447  
4.415  
4.388  
4.233

3.499  
3.484  
3.440  
3.425

1.953  
1.928  
1.911  
1.903  
1.855  
1.803  
1.743  
1.718  
1.693  
1.668  
1.642  
1.495  
1.469  
1.443  
1.435  
1.409  
1.384  
1.287  
1.262  
1.236  
1.211  
1.186  
0.893  
0.868  
0.842  
0.816  
0.791  
0.000

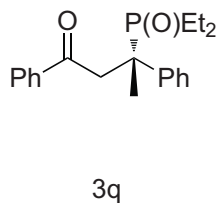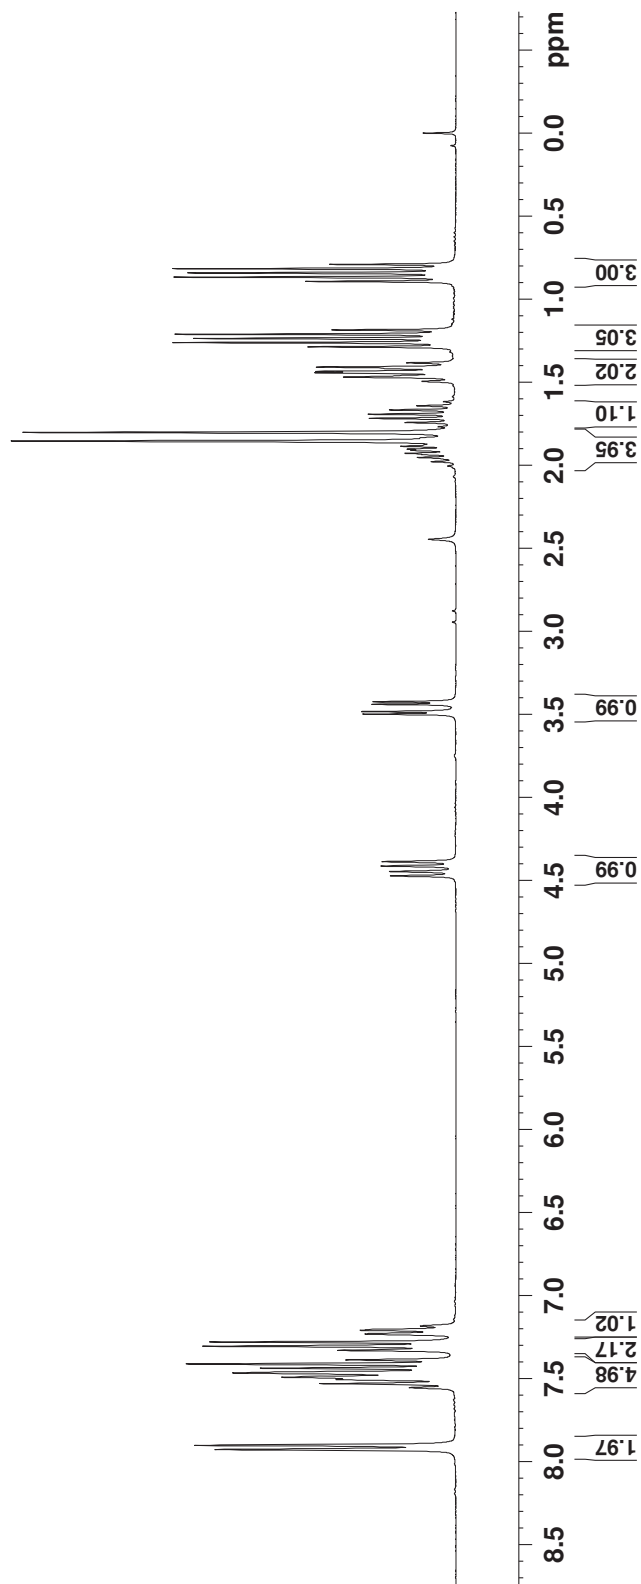

```

NAME 110308
EXPNO 3
PROCNO 1
Date_ 20110308
Time 17.03
INSTRUM spect
PROBHD 5 mm PABBO BB-
PULPROG zgpg30
TD 65536
SOLVENT CDC13
NS 267
DS 4
SWH 18028.846 Hz
FIDRES 0.275098 Hz
AQ 1.8175818 sec
RG 203
DW 27.733 usec
DE 6.50 usec
TE 289.2 K
D1 2.00000000 sec
D11 0.03000000 sec
TD0 1

===== CHANNEL f1 =====
NUC1 13C
P1 9.70 usec
PL1 0.00 dB
PL1W 29.38907051 W
SF01 75.4752953 MHz

===== CHANNEL f2 =====
CPDPRG2 waltz16
NUC2 1H
PCPD2 80.00 usec
PL2 1.00 dB
PL12 17.00 dB
PL13 17.00 dB
PL12W 9.17820644 W
PL12W 0.23054813 W
PL13W 0.23054813 W
SF02 300.1312005 MHz
SI 32768
ST 75.4677549 MHz
WDW EM
SSB 0
LB 1.00 Hz
GB 0
PC 1.40
    
```

6.01  
6.08  
6.43  
6.50  
16.37  
17.24  
17.36  
17.36  
18.17  
19.26

43.17  
42.40  
42.23

77.42  
77.00  
76.58

126.51  
126.54  
126.88  
126.94  
127.86  
128.29  
128.32  
128.43  
128.01  
133.01  
137.37  
139.76  
139.82

196.36  
196.54

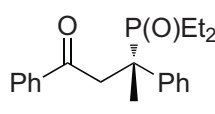

3q

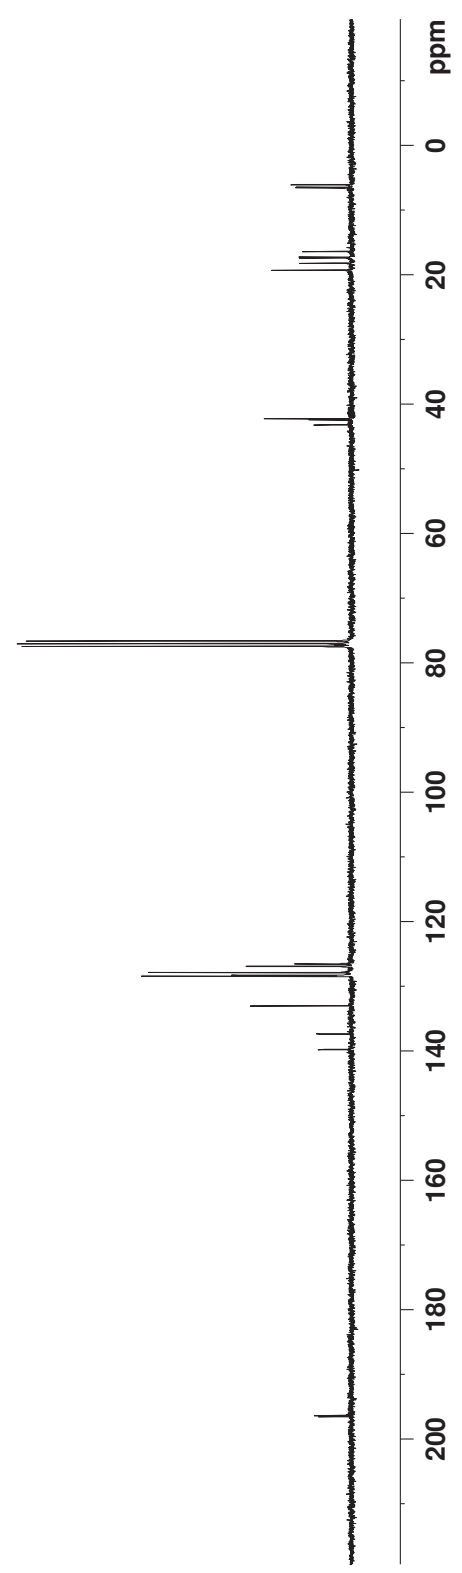



```

NAME          110308
EXPNO         1
PROCNO        1
Date_         20110308
Time_         16.54
INSTRUM       spect
PROBHD        5 mm PABBO BB-
PULPROG       zgpg30
TD            65536
SOLVENT       CDCl3
NS            16
DS            4
SWH           49019.609 Hz
FIDRES        0.747980 Hz
AQ            0.6685172 sec
RG            203
DW            10.200 usec
DE            6.50 usec
TE            289.0 K
D1            2.0000000 sec
D11           0.0300000 sec
TD0           1

===== CHANNEL f1 =====
NUC1          31P
P1            9.10 usec
PL1           0.00 dB
PL1W          36.92473221 W
SFO1          121.4887762 MHz

===== CHANNEL f2 =====
CPDPRG2       waltz16
NUC2          1H
PCPD2         80.00 usec
PL2           1.00 dB
PL12          17.00 dB
PL13          17.00 dB
PL12W         9.17820644 W
PL13W         0.23054613 W
SFO2          300.1312005 MHz
SI            32768
SF            121.4948510 MHz
WDM           EM
SSB           0
LB            1.00 Hz
GB            0
PC            1.40
    
```

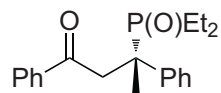

3q

56.32

100 50 0 -50 -100 -150 -200 ppm

```

NAME          20110315
EXENO         1
PROCNO        1
Date_         20110315
Time_         20.26
INSTRUM       spect
PROBHD        5 mm PABBO BB-
PULPROG       zg30
TD            65536
SOLVENT       CDC13
NS            8
DS            2
SWH           6188.119 Hz
FIDRES        0.094423 Hz
AQ            5.2953567 sec
RG            50.8
DE            80.800 usec
TE            288.0 K
D1            1.00000000 sec
TD0           1

===== CHANNEL f1 =====
NUC1          1H
P1            11.80 usec
PL1           0.00 dB
PL12          11.55467796 W
SFO1          300.1318534 MHz
SI            32768
SF            300.1299985 MHz
WDW           EM
SSB           0
LB            0.30 Hz
GB            0
PC            1.00
    
```

1.849  
1.796  
1.671  
1.468  
1.445  
1.423  
1.401  
1.391  
1.384  
1.354  
1.264  
1.254  
1.241  
1.230  
1.208  
1.185  
1.162  
1.139  
1.139  
0.969  
0.946  
0.921  
0.774  
0.751  
0.728  
-0.000

7.931  
7.907  
7.530  
7.506  
7.479  
7.473  
7.453  
7.449  
7.449  
7.446  
7.439  
7.413  
7.389  
7.324  
7.300  
7.273  
7.231  
7.227  
7.208  
7.202

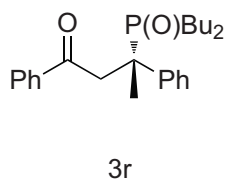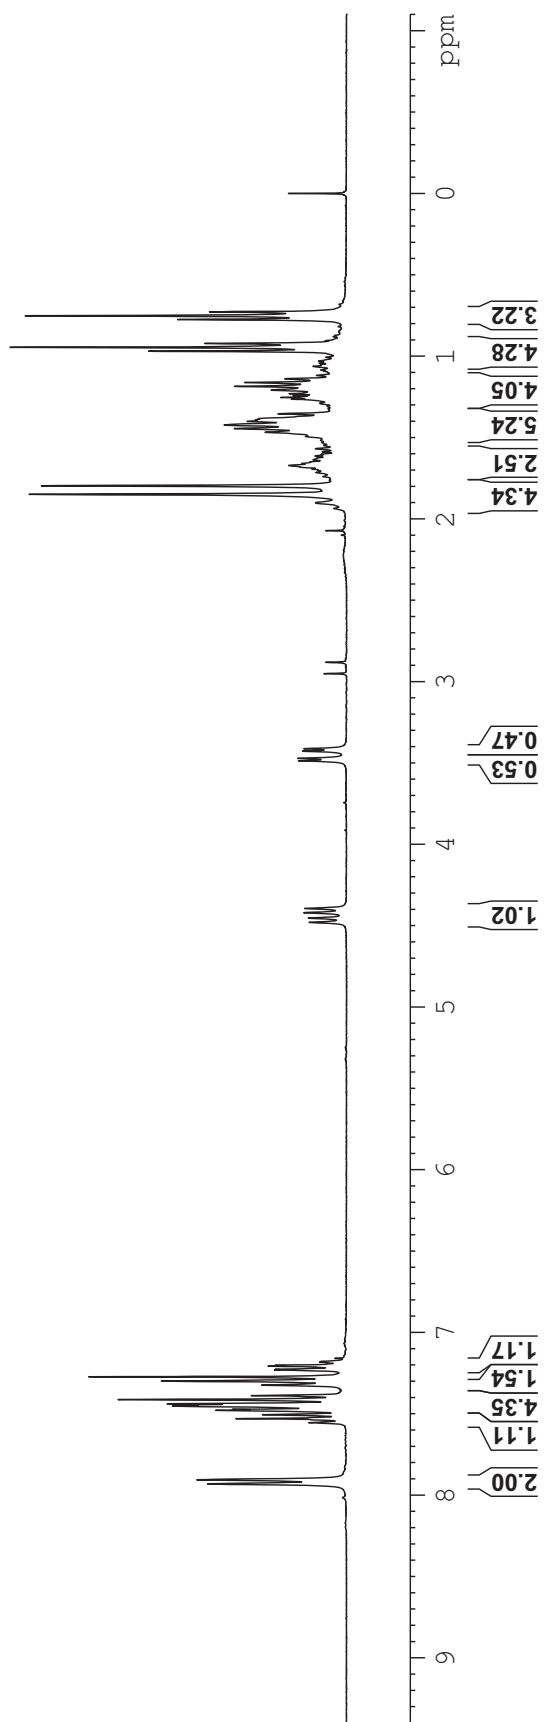

```

NAME                20110315
EXPNO                3
PROCNO              1
Date_                20110315
Time_               21.07
INSTRUM             spect
PROBHD              5 mm PABBO BB-
PULPROG             zgpg30
TD                  65536
SOLVENT             CDC13
NS                   327
DS                   4
SWH                 18028.846 Hz
FIDRES              0.275098 Hz
AQ                  1.8175818 sec
RG                   203
DW                  27.733 usec
DE                   6.50 usec
TE                   289.0 K
D1                   2.0000000 sec
D11                  0.0300000 sec
D10                  0.0300000 sec
TDO                  1

===== CHANNEL f1 =====
NUC1                 13C
P1                   9.70 usec
PL1                  0.00 dB
PL1W                 29.38907051 W
SFO1                  75.4752953 MHz

===== CHANNEL f2 =====
CPDPRG2             waltz16
NUC2                 1H
P2                   80.00 usec
PL2                  1.00 dB
PL12                 17.00 dB
PL13                 17.00 dB
PL14                 17.00 dB
PL15                 17.00 dB
PL16                 17.00 dB
PL17                 17.00 dB
PL18                 17.00 dB
PL19                 17.00 dB
PL20                 17.00 dB
PL21                 17.00 dB
PL22                 17.00 dB
PL23                 17.00 dB
PL24                 17.00 dB
PL25                 17.00 dB
PL26                 17.00 dB
PL27                 17.00 dB
PL28                 17.00 dB
PL29                 17.00 dB
PL30                 17.00 dB
PL31                 17.00 dB
PL32                 17.00 dB
PL33                 17.00 dB
PL34                 17.00 dB
PL35                 17.00 dB
PL36                 17.00 dB
PL37                 17.00 dB
PL38                 17.00 dB
PL39                 17.00 dB
PL40                 17.00 dB
PL41                 17.00 dB
PL42                 17.00 dB
PL43                 17.00 dB
PL44                 17.00 dB
PL45                 17.00 dB
PL46                 17.00 dB
PL47                 17.00 dB
PL48                 17.00 dB
PL49                 17.00 dB
PL50                 17.00 dB
PL51                 17.00 dB
PL52                 17.00 dB
PL53                 17.00 dB
PL54                 17.00 dB
PL55                 17.00 dB
PL56                 17.00 dB
PL57                 17.00 dB
PL58                 17.00 dB
PL59                 17.00 dB
PL60                 17.00 dB
PL61                 17.00 dB
PL62                 17.00 dB
PL63                 17.00 dB
PL64                 17.00 dB
PL65                 17.00 dB
PL66                 17.00 dB
PL67                 17.00 dB
PL68                 17.00 dB
PL69                 17.00 dB
PL70                 17.00 dB
PL71                 17.00 dB
PL72                 17.00 dB
PL73                 17.00 dB
PL74                 17.00 dB
PL75                 17.00 dB
PL76                 17.00 dB
PL77                 17.00 dB
PL78                 17.00 dB
PL79                 17.00 dB
PL80                 17.00 dB
PL81                 17.00 dB
PL82                 17.00 dB
PL83                 17.00 dB
PL84                 17.00 dB
PL85                 17.00 dB
PL86                 17.00 dB
PL87                 17.00 dB
PL88                 17.00 dB
PL89                 17.00 dB
PL90                 17.00 dB
PL91                 17.00 dB
PL92                 17.00 dB
PL93                 17.00 dB
PL94                 17.00 dB
PL95                 17.00 dB
PL96                 17.00 dB
PL97                 17.00 dB
PL98                 17.00 dB
PL99                 17.00 dB
PL100                17.00 dB
SFO2                  300.1312005 MHz
SI                    32768
SF                    75.4677490 MHz
WDW                   EM
SSB                    0
LB                    1.00 Hz
GB                    0
PC                    1.40
    
```

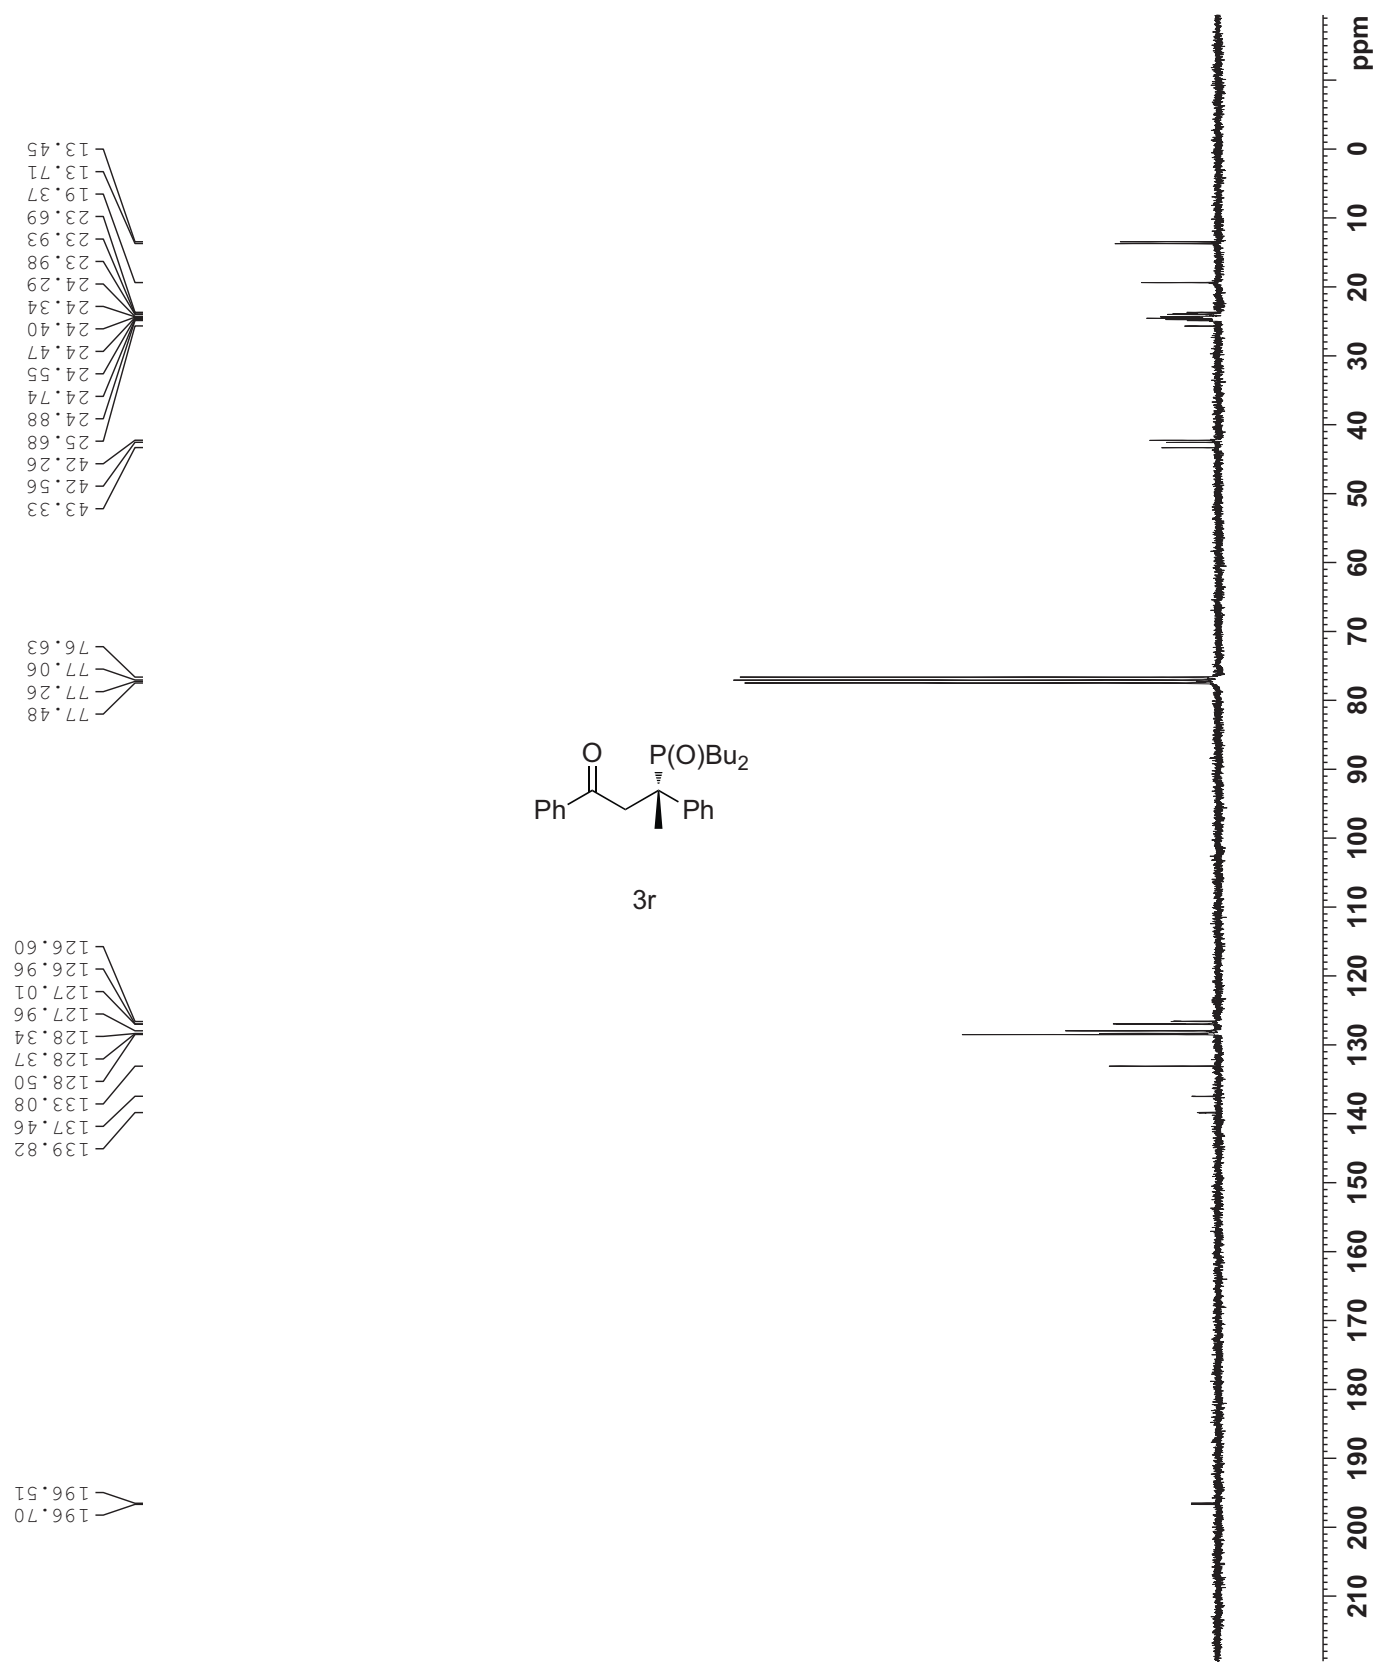

54.29

```

NAME                20110315
EXPNO                1
PROCNO              1
Date_              20110315
Time_              20.29
INSTRUM            spect
PROBHD             5 mm PABBO BBT
PULPROG            zgpg30
SOLVENT            CDCl3
NS                  14
DS                  4
SWH                 49019.609 Hz
FIDRES              0.747980 Hz
AQ                  0.6665172 sec
RG                  203
DE                  10.200 usec
TE                  286.2 K
D1                  2.0000000 sec
D11                 0.0300000 sec
TD0                 1

===== CHANNEL f1 =====
NUC1                 31P
P1                   9.10 usec
PL1                  0.00 dB
PL1W                 36.92473221 W
SFO1                 121.4867762 MHz

===== CHANNEL f2 =====
CPDPRG2             waltz16
NUC2                 1H
PCPD2               80.00 usec
P2                   1.00 dB
PL2                  17.00 dB
PL13                 17.00 dB
PL2W                 9.17820644 W
PL12W                0.23054613 W
PL13W                0.23054613 W
SFO2                 300.1312005 MHz
ST                   32768
SF                   121.4946510 MHz
WDW                  EM
SSB                   0
LB                   1.00 Hz
GB                   0
PC                   1.40
    
```

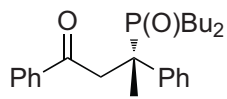

3r

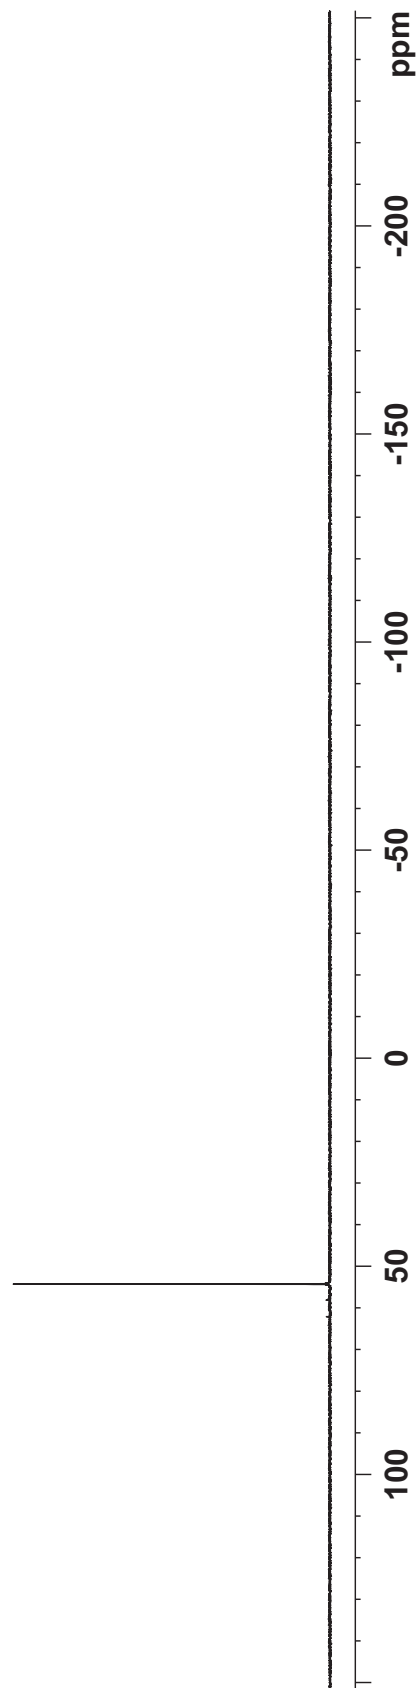

```

NAME: 110224
EXPNO: 12
PROCNO: 1
Date_ : 20110224
Time_ : 19:41
INSTRUM: spect
PROBHD: 5 mm PABBO-BB-
PULPROG: zg30
TD: 65536
SOLVENT: CDCl3
NS: 8
DS: 2
SWH: 6188.119 Hz
FIDRES: 0.108423 Hz
AQ: 5.295357 sec
RG: 57
DE: 80.800 usec
TE: 288.6 K
D1: 1.0000000 sec
TD0: 1

===== CHANNEL f1 =====
NUC1: 1H
P1: 11.80 usec
PL1: 0.00 dB
PL1W: 11.55467796 W
SFO1: 300.1318534 MHz
SI: 32768
SF: 300.1299996 MHz
WDW: EM
SSB: 0
LB: 0.30 Hz
GB: 0
PC: 1.00
    
```

0.000

1.868  
 1.923  
 2.212  
 2.237  
 2.257  
 2.282  
 2.668  
 2.692  
 2.705  
 2.733  
 2.770  
 3.408  
 3.423  
 3.466  
 3.481  
 4.153  
 4.180  
 4.212  
 4.239  
 5.128  
 5.161  
 5.292  
 5.322  
 5.600  
 5.615  
 5.623  
 5.639  
 5.967  
 5.983  
 5.991  
 6.008  
 6.247  
 6.254  
 6.261  
 7.261  
 7.269  
 7.276  
 7.299  
 7.342  
 7.368  
 7.392  
 7.487  
 7.506  
 7.512

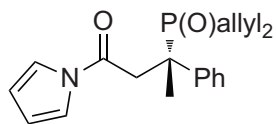

4a

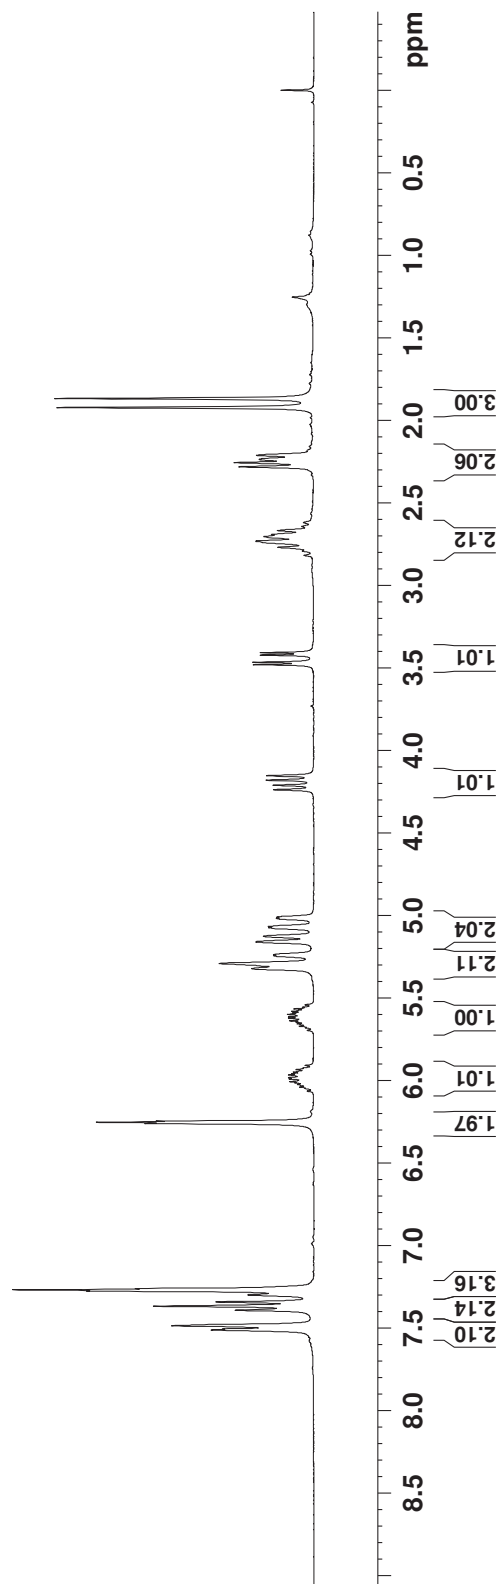

```

NAME 110224
EXPNO 14
PROCNO 1
Date_ 20110224
Time 20.06
INSTRUM spect
PROBHD 5 mm PABBO BB-
PULPROG zgpg30
TD 65536
SOLVENT CDC13
NS 317
DS 4
SWH 18028.846 Hz
FIDRES 0.275098 Hz
AQ 1.8175818 sec
RG 203
DW 27.733 usec
DE 6.50 usec
TE 289.3 K
D1 2.00000000 sec
D11 0.03000000 sec
TD0 1

===== CHANNEL f1 =====
NUC1 13C
P1 9.70 usec
PL1 0.00 dB
PL1W 29.38907051 W
SF01 75.4752953 MHz

===== CHANNEL f2 =====
CPDPRG2 waltz16
NUC2 1H
PCPD2 80.00 usec
PL2 1.00 dB
PL12 17.00 dB
PL13 17.00 dB
PL1W 9.17820644 W
PL12W 0.23054813 W
PL13W 0.23054813 W
SF02 300.1312005 MHz
SI 32768
ST 75.4677548 MHz
WDW EM
SSB 0
LB 1.00 Hz
GB 0
PC 1.40
    
```

19.15  
 30.48  
 30.91  
 31.31  
 31.69  
 39.19  
 43.36  
 44.11

76.57  
 77.00  
 77.42

113.11  
 118.94  
 120.18  
 120.32  
 120.49  
 120.64  
 126.88  
 126.94  
 127.17  
 127.21  
 127.87  
 127.98  
 128.33  
 128.44  
 128.63  
 128.66  
 138.79  
 138.85

166.47  
 166.70

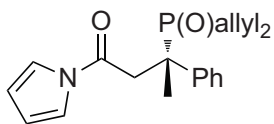

4a

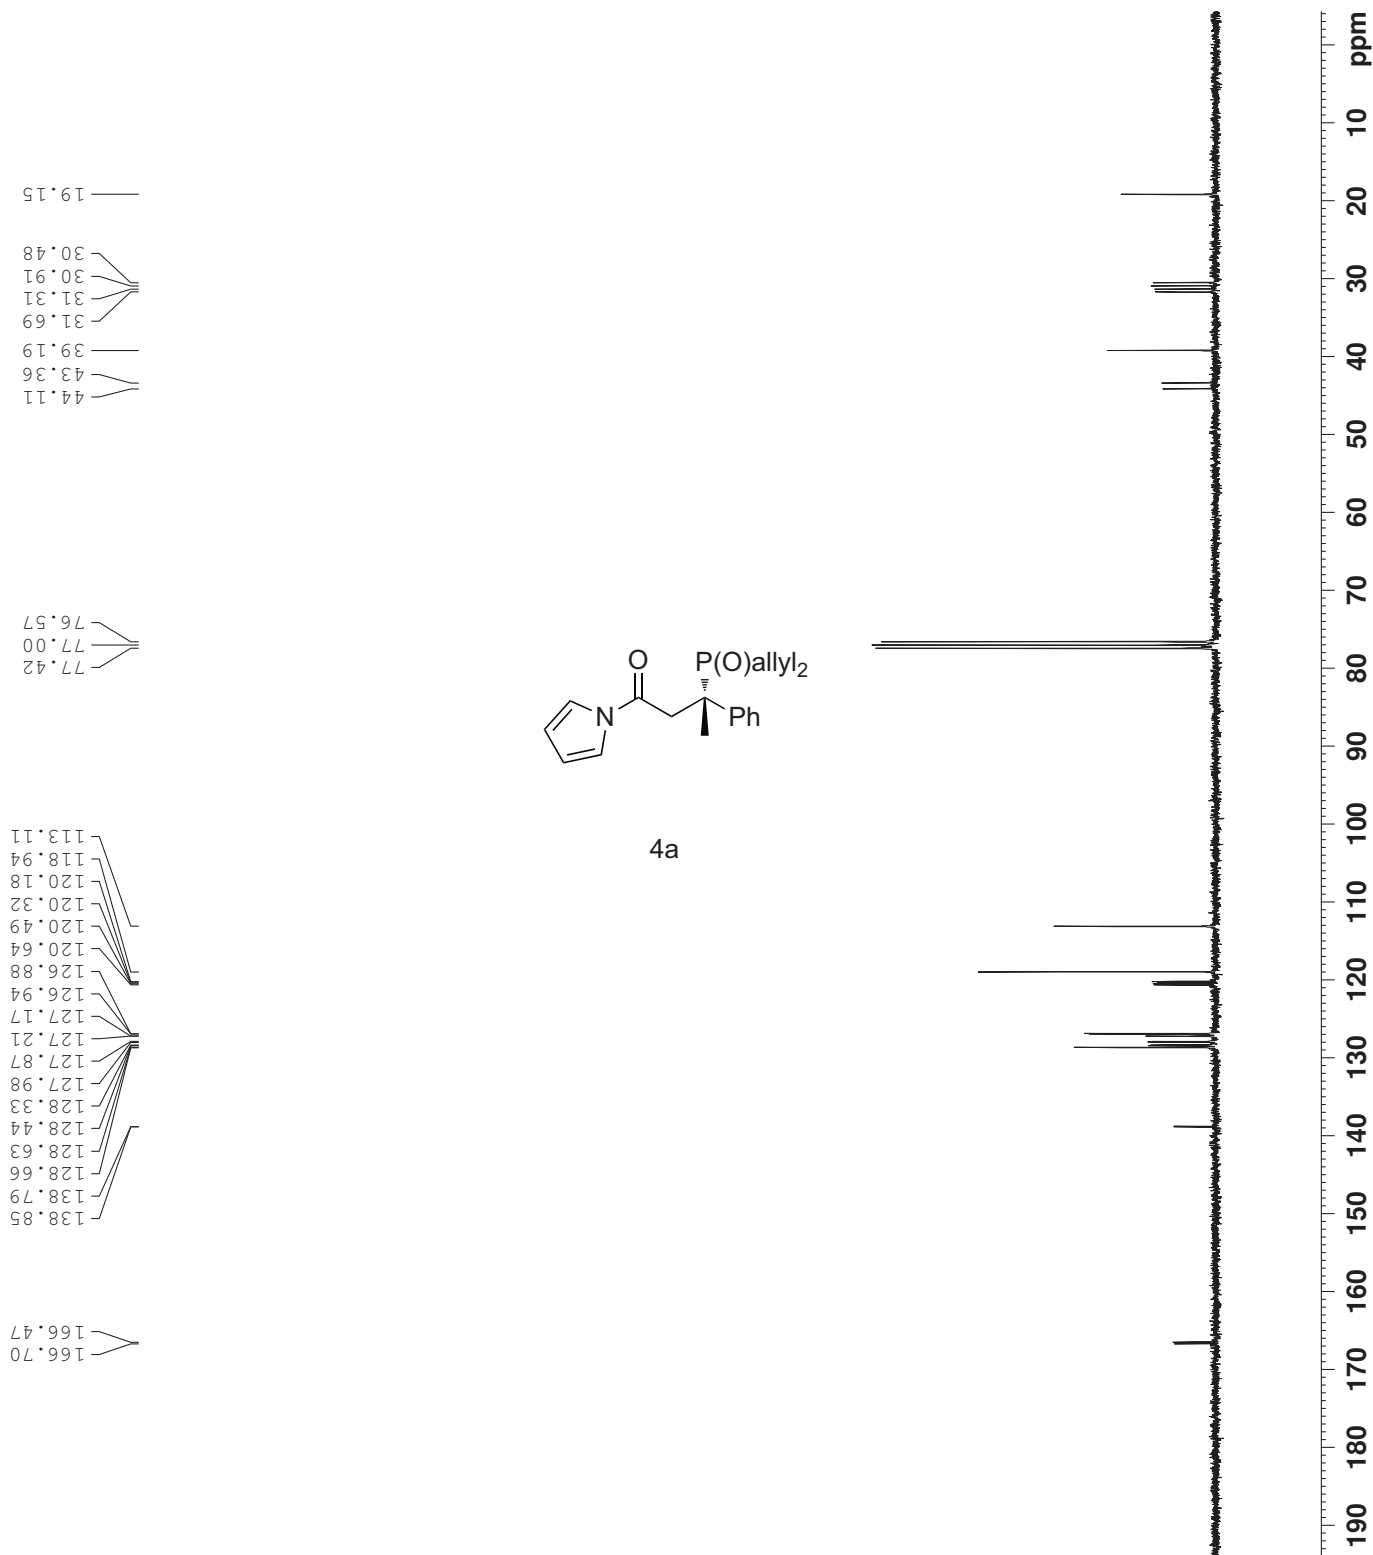

```

NAME          110224
EXPNO         13
PROCNO        1
Date_         20110224
Time_         19.44
INSTRUM       spect
PROBHD        5 mm PABBO BB-
PULPROG       zgpg30
TD            65536
SOLVENT       CDCl3
NS            16
DS            4
SWH           49019.609 Hz
FIDRES        0.747980 Hz
AQ            0.6685172 sec
RG            203
DW            10.200 usec
DE            6.50 usec
TE            288.7 K
D1            2.0000000 sec
D11           0.0300000 sec
TD0           1

===== CHANNEL f1 =====
NUC1          31P
P1            9.10 usec
PL1           0.00 dB
PL1W          36.92473221 W
SFO1          121.4887762 MHz

===== CHANNEL f2 =====
CPDPRG2       waltz16
NUC2          1H
PCPD2         80.00 usec
PL2           1.00 dB
PL12          17.00 dB
PL13          17.00 dB
PL12W         9.17820644 W
PL13W         0.23054613 W
SFO2          300.1312005 MHz
SI            32768
SF            121.4948510 MHz
WDM           EM
SSB           0
LB            1.00 Hz
GB            0
PC            1.40
    
```



4a

49.62

100 50 0 -50 -100 -150 -200 ppm

```

NAME      110226
EXPNO    7
PROCNO   1
Date_    20110226
Time     15.14
INSTRUM  spect
PROBHD   5 mm PABBO BB-
PULPROG  zg30
TD        65536
SOLVENT  CDCl3
NS        8
DS        2
SWH       6188.119 Hz
FIDRES   0.094423 Hz
AQ        5.2953587 sec
RG        64
DW        80.800 usec
DE        6.50 usec
TE        286.8 K
D1        1.00000000 sec
TD0       1

===== CHANNEL f1 =====
NUC1      1H
P1        11.80 usec
PL1       0.00 dB
PL1W      11.55467796 W
SFO1      300.1318534 MHz
SI        32768
SF        300.1299994 MHz
WDW       EM
SSB       0
LB        0.30 Hz
GB        0
PC        1.00
    
```

0.000

1.839  
 1.894  
 2.216  
 2.241  
 2.261  
 2.286  
 2.692  
 2.716  
 2.733  
 3.370  
 3.385  
 3.428  
 3.443  
 3.792  
 4.096  
 4.123  
 4.154  
 4.181  
 5.025  
 5.082  
 5.089  
 5.137  
 5.169  
 5.238  
 5.245  
 5.292  
 5.322  
 5.619  
 5.633  
 5.642  
 5.657  
 5.973  
 5.989  
 5.997  
 6.013  
 6.249  
 6.257  
 6.264  
 6.882  
 6.911  
 7.271  
 7.281  
 7.389  
 7.396  
 7.419  
 7.426

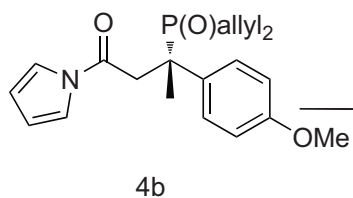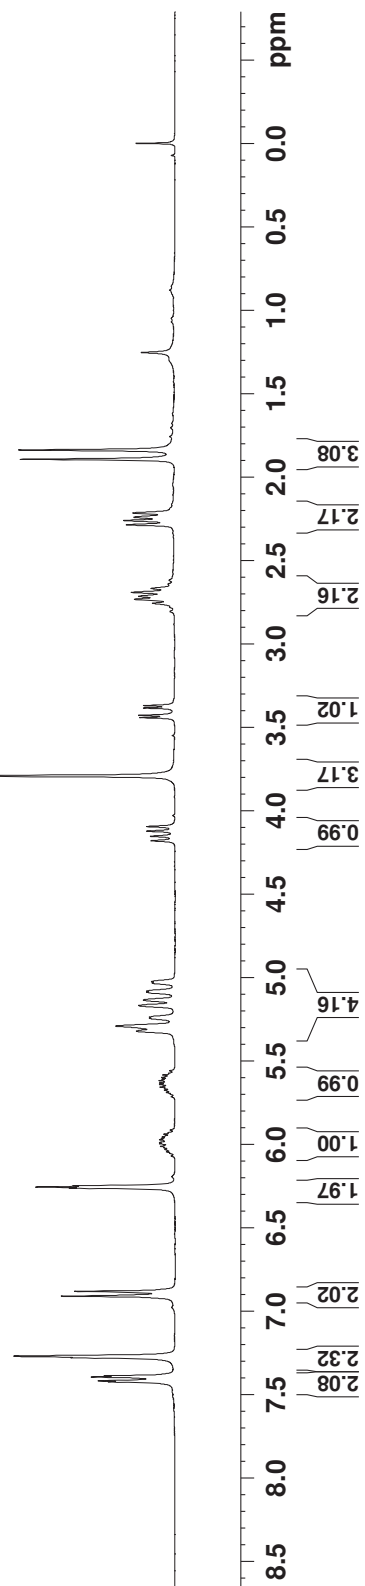



```

NAME                110226
EXPNO                8
PROCNO               1
Date_                20110226
Time                15.23
INSTRUM             spect
PROBHD              5 mm PABBO BB-
PULPROG             zgpg30
TD                  65536
SOLVENT             CDC13
NS                  454
DS                  4
SWH                 18028.846 Hz
FIDRES              0.275098 Hz
AQ                  1.8175818 sec
RG                  203
DW                  27.733 usec
DE                  6.50 usec
TE                  287.8 K
D1                  2.00000000 sec
D11                 0.03000000 sec
TD0                 1

===== CHANNEL f1 =====
NUC1                 13C
P1                   9.70 usec
PL1                  0.00 dB
PL1W                 29.38907051 W
SF01                 75.4752953 MHz

===== CHANNEL f2 =====
CPDPRG2             waltz16
NUC2                 1H
PCPD2               80.00 usec
PL2                  1.00 dB
PL12                 17.00 dB
PL13                 17.00 dB
PL1W                 9.17820644 W
PL12W                0.23054813 W
PL13W                0.23054813 W
SF02                 300.1312005 MHz
SI                  32768
ST                  75.4677525 MHz
WDW                 EM
SSB                  0
LB                   1.00 Hz
GB                   0
PC                   1.40
    
```

19.26  
 30.48  
 30.92  
 31.32  
 31.68  
 31.68  
 39.13  
 42.71  
 43.48  
 55.14  
 76.58  
 77.00  
 77.43  
 113.12  
 114.00  
 114.04  
 118.98  
 120.15  
 120.30  
 120.44  
 120.59  
 127.99  
 128.03  
 128.09  
 128.43  
 128.54  
 130.55  
 130.61  
 158.51  
 158.55  
 166.61  
 166.83

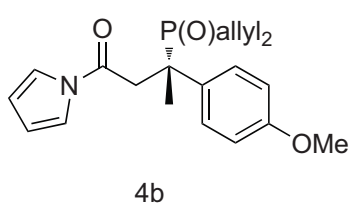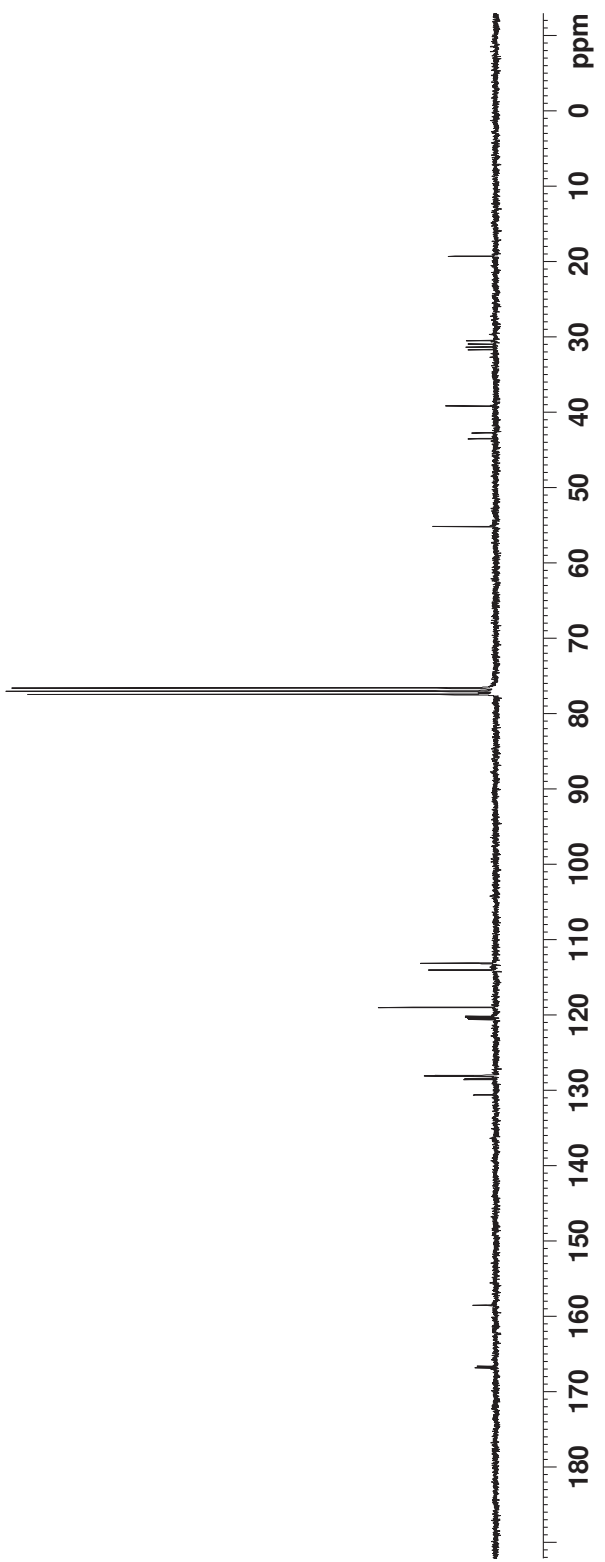

```

NAME 110226
EXPNO 9
PROCNO 1
Date_ 20110226
Time_ 15.50
INSTRUM spect
PROBHD 5 mm PABBO BB-
PULPROG zgpg30
TD 65536
SOLVENT CDCl3
NS 16
DS 4
SWH 49019.609 Hz
FIDRES 0.747980 Hz
AQ 0.6685172 sec
RG 203
DW 10.200 usec
DE 6.50 usec
TE 287.5 K
D1 2.0000000 sec
D11 0.0300000 sec
TDO 1

===== CHANNEL f1 =====
NUC1 31P
P1 9.10 usec
PL1 0.00 dB
PL1W 36.92473221 W
SFO1 121.4887762 MHz

===== CHANNEL f2 =====
CPDPRG2 waltz16
NUC2 1H
PCPD2 80.00 usec
PL2 1.00 dB
PL12 17.00 dB
PL13 17.00 dB
PL12W 9.17820644 W
PL13W 0.23054613 W
SFO2 300.1312005 MHz
SI 32768
SF 121.4948510 MHz
WDM EM
SSB 0
LB 1.00 Hz
GB 0
PC 1.40
    
```

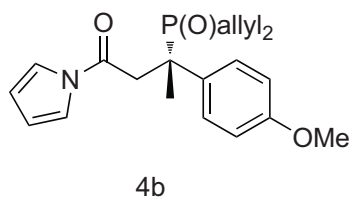

49.96

100 50 0 -50 -100 -150 -200 ppm

```

NAME      110224
EXPNO    15
PROCNO   1
Date_    20110224
Time_    20.33
INSTRUM  spect
PROBHD   5 mm PABBO-4B
PULPROG  zgpg30
TD        65536
SOLVENT  CDCl3
NS        8
DS        2
SWH       6188.113 Hz
FIDRES    0.094423 Hz
AQ        5.2355567 sec
RG        45.2
DW        80.600 usec
DE        6.50 usec
TE        288.8 K
D1        1.00000000 sec
ID0       1

===== CHANNEL f1 =====
NUC1      1H
P1        11.80 usec
PL1       0.00 dB
PL12      11.55467796 W
SF01      300.1318534 MHz
SI        32768
SF        300.1299974 MHz
EM        0
WDW       0
SSB       0.30 Hz
LB        0
GB        0
PC        1.00
    
```

1.834  
1.889  
2.205  
2.233  
2.238  
2.242  
2.262  
2.266  
2.704  
2.741  
2.744  
2.766  
2.770  
3.385  
3.399  
3.443  
3.458  
4.116  
4.143  
4.175  
4.201  
5.004  
5.008  
5.017  
5.021  
5.060  
5.065  
5.073  
5.078  
5.132  
5.136  
5.166  
5.170  
5.312  
5.316  
5.589  
5.598  
5.612  
5.622  
5.637  
5.960  
5.976  
5.985  
5.994  
6.010  
6.017  
6.034  
6.255  
6.263  
6.270  
6.270  
7.244  
7.252  
7.260  
7.276  
7.321  
7.349  
7.433  
7.440  
7.455  
7.462  
7.469

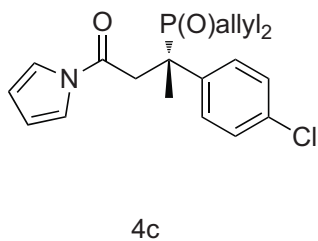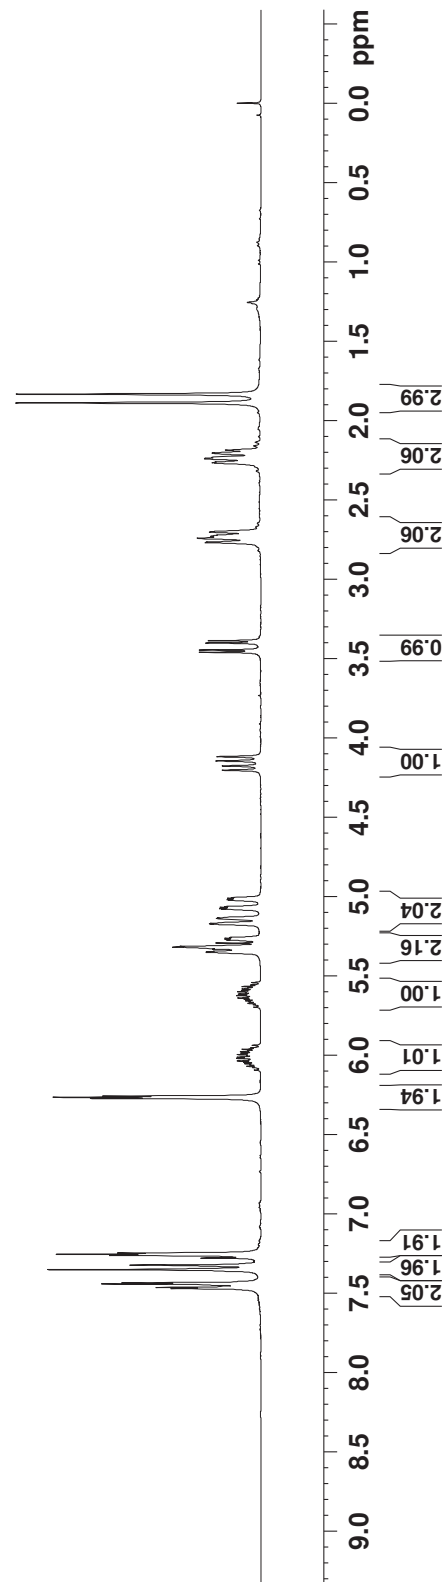

```

NAME 110224
EXPNO 17
PROCNO 1
Date_ 20110224
Time 20.52
INSTRUM spect
PROBHD 5 mm PABBO BB-
PULPROG zgpg30
TD 65536
SOLVENT CDC13
NS 280
DS 4
SWH 18028.846 Hz
FIDRES 0.275098 Hz
AQ 1.8175818 sec
RG 203
DW 27.733 usec
DE 6.50 usec
TE 289.4 K
D1 2.00000000 sec
D11 0.03000000 sec
TD0 1

===== CHANNEL f1 =====
NUC1 13C
P1 9.70 usec
PL1 0.00 dB
PL1W 29.38907051 W
SF01 75.4752953 MHz

===== CHANNEL f2 =====
CPDPRG2 waltz16
NUC2 1H
PCPD2 80.00 usec
PL2 1.00 dB
PL12 17.00 dB
PL13 17.00 dB
PL14 17.00 dB
PL12W 9.17820644 W
PL12W 0.23054813 W
PL13W 0.23054813 W
SF02 300.1312005 MHz
SI 32768
ST 75.4677562 MHz
WDW EM
SSB 0
LB 1.00 Hz
GB 0
PC 1.40
    
```

43.74  
42.99  
39.21  
31.69  
31.29  
30.92  
30.45  
19.13

77.42  
77.00  
76.58

137.55  
137.49  
133.25  
133.20  
128.74  
128.70  
128.39  
128.33  
128.24  
128.13  
127.56  
127.45  
120.79  
120.64  
120.53  
120.38  
118.85  
113.27

166.49  
166.26

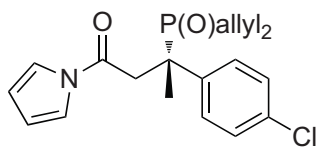

4c

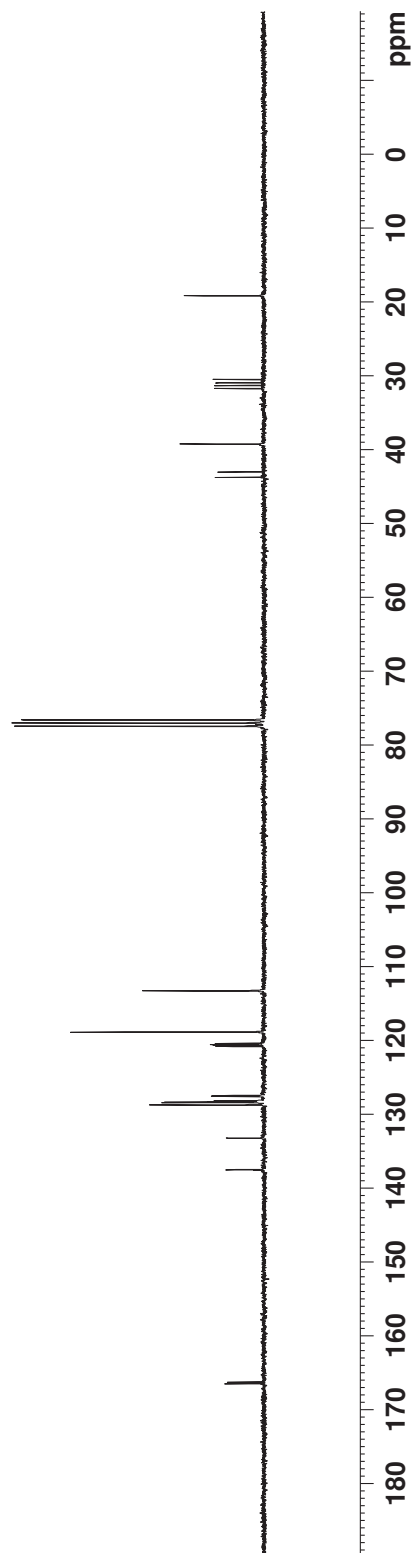

```
NAME 110224
EXPNO 16
PROCNO 1
Date_ 20110224
Time_ 20.36
INSTRUM spect
PROBHD 5 mm PABBO BB-
PULPROG zgpg30
TD 65536
SOLVENT CDCl3
NS 16
DS 4
SWH 49019.609 Hz
FIDRES 0.747980 Hz
AQ 0.6685172 sec
RG 203
DW 10.200 usec
DE 6.50 usec
TE 289.1 K
D1 2.0000000 sec
D11 0.0300000 sec
TDO 1

===== CHANNEL f1 =====
NUC1 31P
P1 9.10 usec
PL1 0.00 dB
PL1W 36.92473221 W
SFO1 121.4887762 MHz

===== CHANNEL f2 =====
CPDPRG2 waltz16
NUC2 1H
PCPD2 80.00 usec
PL2 1.00 dB
PL12 17.00 dB
PL13 17.00 dB
PL12W 9.17820644 W
PL13W 0.23054613 W
SFO2 300.1312005 MHz
SI 32768
SF 121.4948510 MHz
WDW EM
SSB 0
LB 1.00 Hz
GB 0
PC 1.40
```

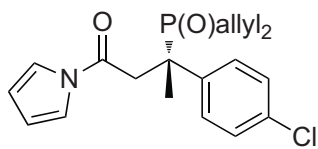

4c

49.13

100 50 0 -50 -100 -150 -200 ppm

```

NAME      110301
EXPNO     1
PROCNO    1
Date_     201110301
Time_     17.05
INSTRUM   spect
PROBHD    5 mm PABBO-430
PULPROG   zgpg30
TD         65536
SOLVENT   CDCl3
NS         8
DS         2
SWH        6188.113 Hz
FIDRES     0.094423 Hz
AQ         5.2355567 sec
RG         45.2
DW         80.600 usec
DE         6.50 usec
TE         286.8 K
D1         1.00000000 sec
ID0        1

===== CHANNEL f1 =====
NUC1       1H
P1         11.80 usec
PL1        0.00 dB
PL12       11.55467796 W
SF01       300.1318534 MHz
SI         32768
SF         300.1300035 MHz
EM         0
WDW        0
SSB        0.30 Hz
LB         0
GB         0
PC         1.00
    
```

000.000

1.988  
 2.043  
 2.229  
 2.254  
 2.275  
 2.300  
 2.710  
 2.733  
 2.753  
 2.776  
 2.815  
 3.530  
 3.545  
 3.588  
 3.603  
 5.029  
 5.037  
 5.082  
 5.086  
 5.116  
 5.120  
 5.247  
 5.255  
 5.292  
 5.298  
 5.303  
 5.317  
 5.576  
 5.591  
 5.601  
 5.610  
 5.625  
 5.633  
 5.648  
 5.989  
 5.998  
 6.014  
 6.022  
 6.038  
 6.239  
 6.247  
 6.254  
 7.256  
 7.298  
 7.454  
 7.460  
 7.469  
 7.479  
 7.486  
 7.667  
 7.697  
 7.791  
 7.820  
 7.847  
 7.912

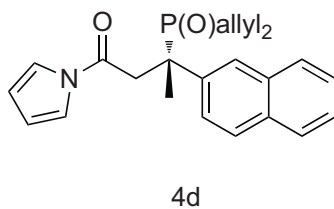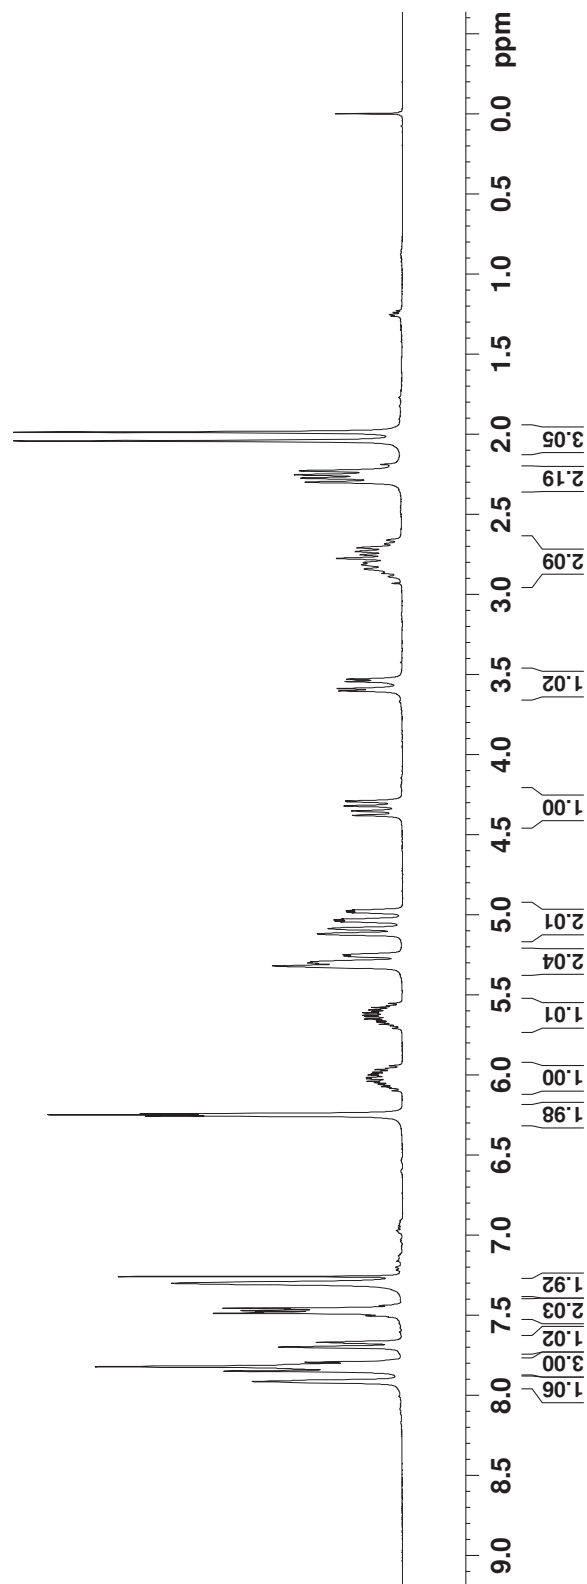

```
NAME 110301
EXPNO 3
PROCNO 1
Date_ 20110301
Time 17.18
INSTRUM spect
PROBHD 5 mm PABBO BB-
PULPROG zgpg30
TD 65536
SOLVENT CDC13
NS 204
DS 4
SWH 18028.846 Hz
FIDRES 0.275098 Hz
AQ 1.8175818 sec
RG 203
DW 27.733 usec
DE 6.50 usec
TE 287.5 K
D1 2.00000000 sec
D11 0.03000000 sec
TD0 1

===== CHANNEL f1 =====
NUC1 13C
P1 9.70 usec
PL1 0.00 dB
PL1W 29.38907051 W
SF01 75.4752953 MHz

===== CHANNEL f2 =====
CPDPRG2 waltz16
NUC2 1H
PCPD2 80.00 usec
PL2 1.00 dB
PL12 17.00 dB
PL13 17.00 dB
PL14 17.00 dB
PL12W 9.17820644 W
PL12W 0.23054813 W
PL13W 0.23054813 W
SF02 300.1312005 MHz
SI 32768
ST 75.4677558 MHz
WDW EM
SSB 0
LB 1.00 Hz
GB 0
PC 1.40
```

19.31  
30.48  
30.77  
31.31  
31.55  
39.29  
43.63  
44.38

76.57  
77.00  
77.42

113.17  
119.00  
120.38  
120.52  
120.70  
120.85  
124.73  
124.78  
126.12  
126.20  
126.29  
127.45  
127.66  
127.77  
128.17  
128.33  
132.18  
132.20  
133.06  
133.09  
136.28

166.41  
166.64

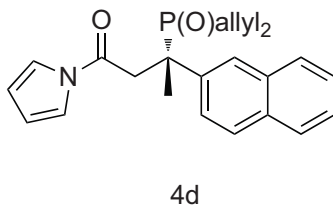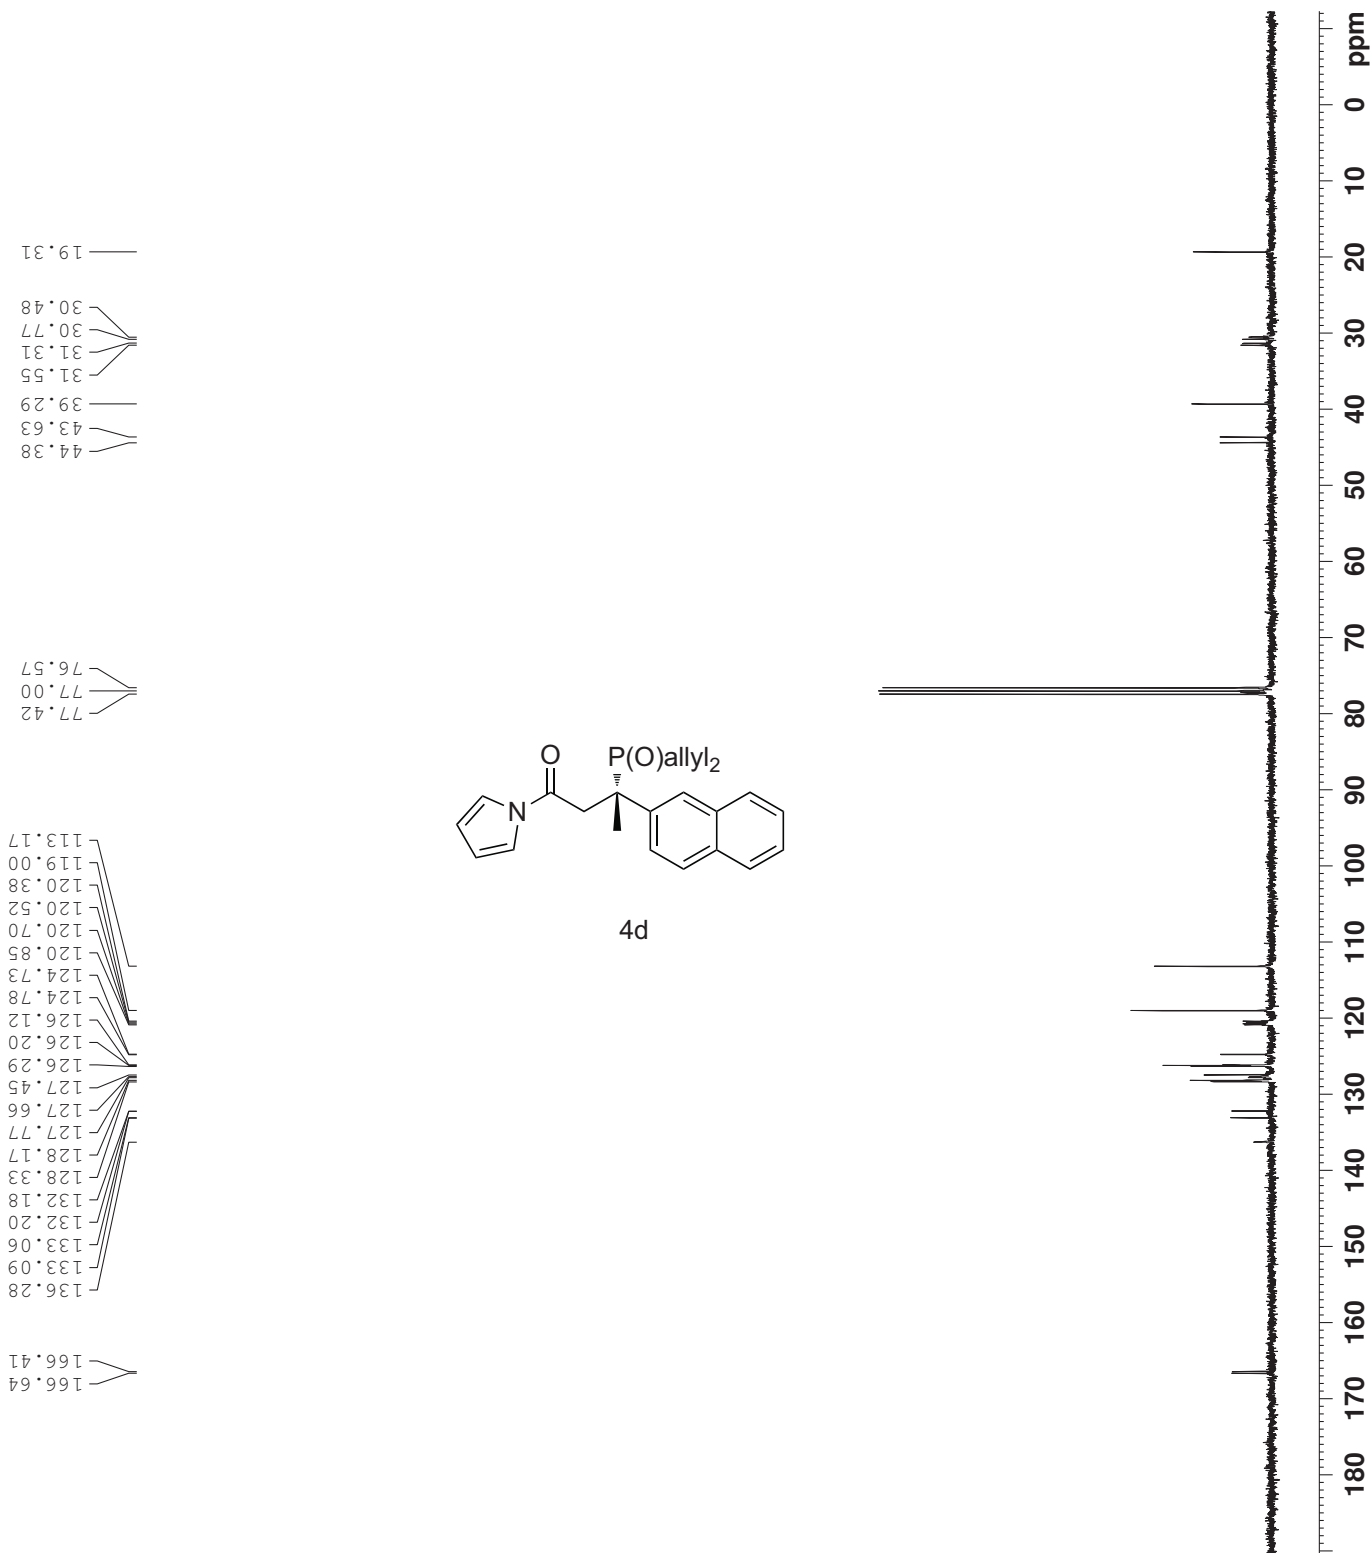

```
NAME 110301
EXPNO 2
PROCNO 1
Date_ 20110301
Time_ 17.08
INSTRUM spect
PROBHD 5 mm PABBO BB-
PULPROG zgpg30
TD 65536
SOLVENT CDCl3
NS 16
DS 4
SWH 49019.609 Hz
FIDRES 0.747980 Hz
AQ 0.6685172 sec
RG 203
DW 10.200 usec
DE 6.50 usec
TE 286.8 K
D1 2.0000000 sec
D11 0.0300000 sec
TDO 1

===== CHANNEL f1 =====
NUC1 31P
P1 9.10 usec
PL1 0.00 dB
PL1W 36.92473221 W
SFO1 121.4887762 MHz

===== CHANNEL f2 =====
CPDPRG2 waltz16
NUC2 1H
PCPD2 80.00 usec
PL2 1.00 dB
PL12 17.00 dB
PL13 17.00 dB
PL12W 9.17820644 W
PL13W 0.23054613 W
SFO2 300.1312005 MHz
SI 32768
SF 121.4948510 MHz
WDM EM
SSB 0
LB 1.00 Hz
GB 0
PC 1.40
```



50.31

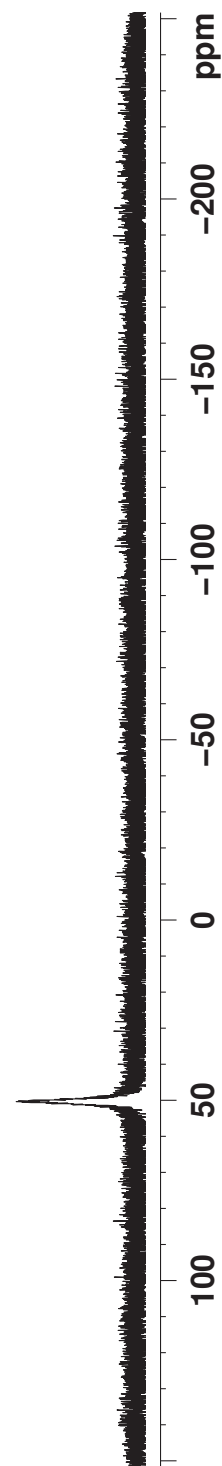



```

NAME      110326
EXPNO     1
PROCNO    1
Date_     20110326
Time      10.19
Spect     5 mm PABBO_BB
PROBHD    zg30
PULPROG   zgpg30
ID        65536
SOLVENT   CDCl3
NS         8
DS         2
SWH       6188.119 Hz
FIDRES    0.094423 Hz
AQ        5.2953587 sec
RG         36
DW        80.800 usec
DE        6.50 usec
TE        289.7 K
D1        1.00000000 sec
TD0       1

===== CHANNEL f1 =====
NUC1      1H
P1        11.80 usec
PL1       0.00 dB
PL12      11.55467796 W
SFO1      300.1318534 MHz
SI        32768
SF        300.1299932 MHz
WDW       EM
SSB       0
LB        0.30 Hz
GB         0
PC        1.00
    
```

7.364  
7.290  
7.302  
6.294  
6.286  
5.982  
5.973  
5.960  
5.956  
5.950  
5.934  
5.926  
5.916  
5.905  
5.900  
5.894  
5.277  
5.274  
5.270  
5.257  
5.252  
5.247  
5.243  
5.239  
5.234  
5.226  
5.219  
5.214  
5.209  
3.360  
3.328  
3.305  
3.274  
3.126  
3.085  
3.072  
3.030  
2.816  
2.793  
2.776  
2.765  
2.751  
2.725  
2.709  
2.684  
1.867  
1.853  
1.830  
1.813  
1.441  
1.432  
1.418  
1.394  
1.379  
1.342  
1.305  
1.283  
1.259  
0.913  
0.890  
0.866  
-0.000

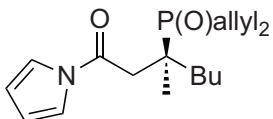

4e

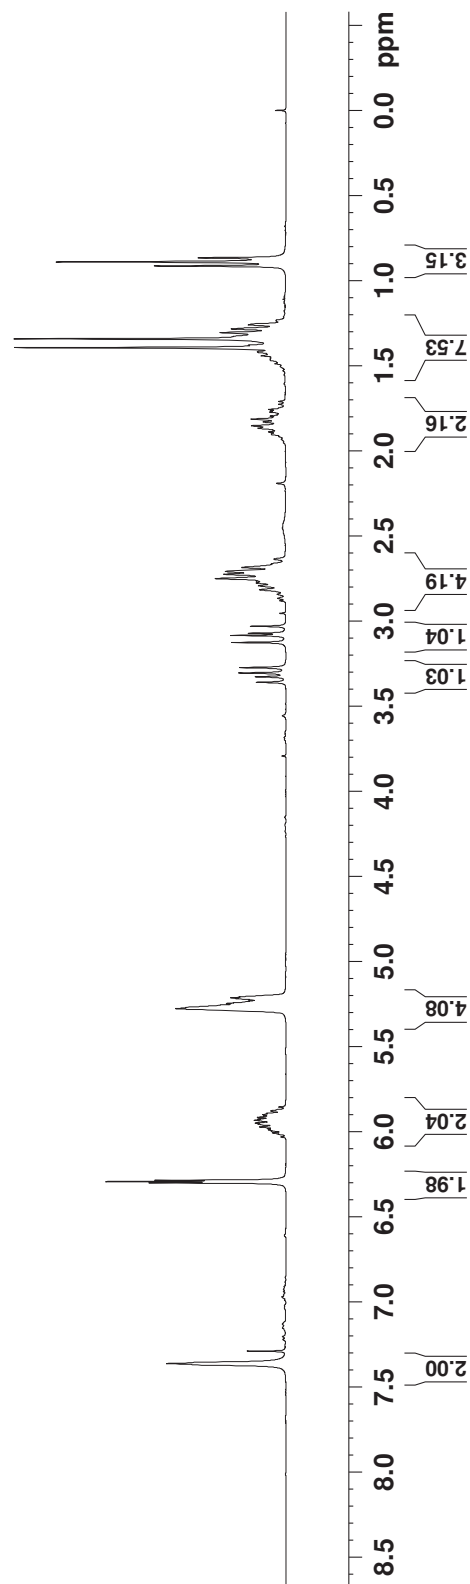

```

NAME 110326
EXPNO 3
PROCNO 1
Date_ 20110326
Time 10.35
INSTRUM spect
PROBHD 5 mm PABBO BB
PULPROG zgpg30
TD 65536
SOLVENT CDCl3
NS 201
DS 4
SWH 18026.846 Hz
FIDRES 0.275098 Hz
AQ 1.8179818 sec
RG 203
DW 27.733 usec
DE 6.50 usec
TE 290.6 K
D1 2.00000000 sec
D11 0.03000000 sec
TDO 1

===== CHANNEL f1 =====
NUC1 13C
P1 9.70 usec
PL1 0.00 dB
PL1W 29.38907051 W
SF01 75.4752953 MHz

===== CHANNEL f2 =====
CPDPRG2 walzr16
NUC2 1H
PCPD2 80.00 usec
PL2 1.00 dB
PL12 17.00 dB
PL13 17.00 dB
PL2W 9.17820644 W
PL12W 0.23054613 W
PL13W 0.23054613 W
SFO2 300.1312005 MHz
SI 32768
SF 75.4677547 MHz
WDW EM
SSB 0
LB 1.00 Hz
GB 0
PC 1.40
    
```

40.21  
39.41  
36.98  
34.47  
32.19  
31.92  
31.41  
31.14  
26.27  
26.19  
23.18  
20.70  
13.77

77.42  
77.00  
76.58

128.59  
128.47  
128.35  
120.35  
120.32  
120.20  
120.17  
119.24  
113.33

168.21  
168.07

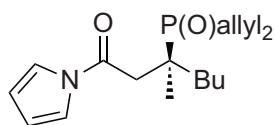

4e

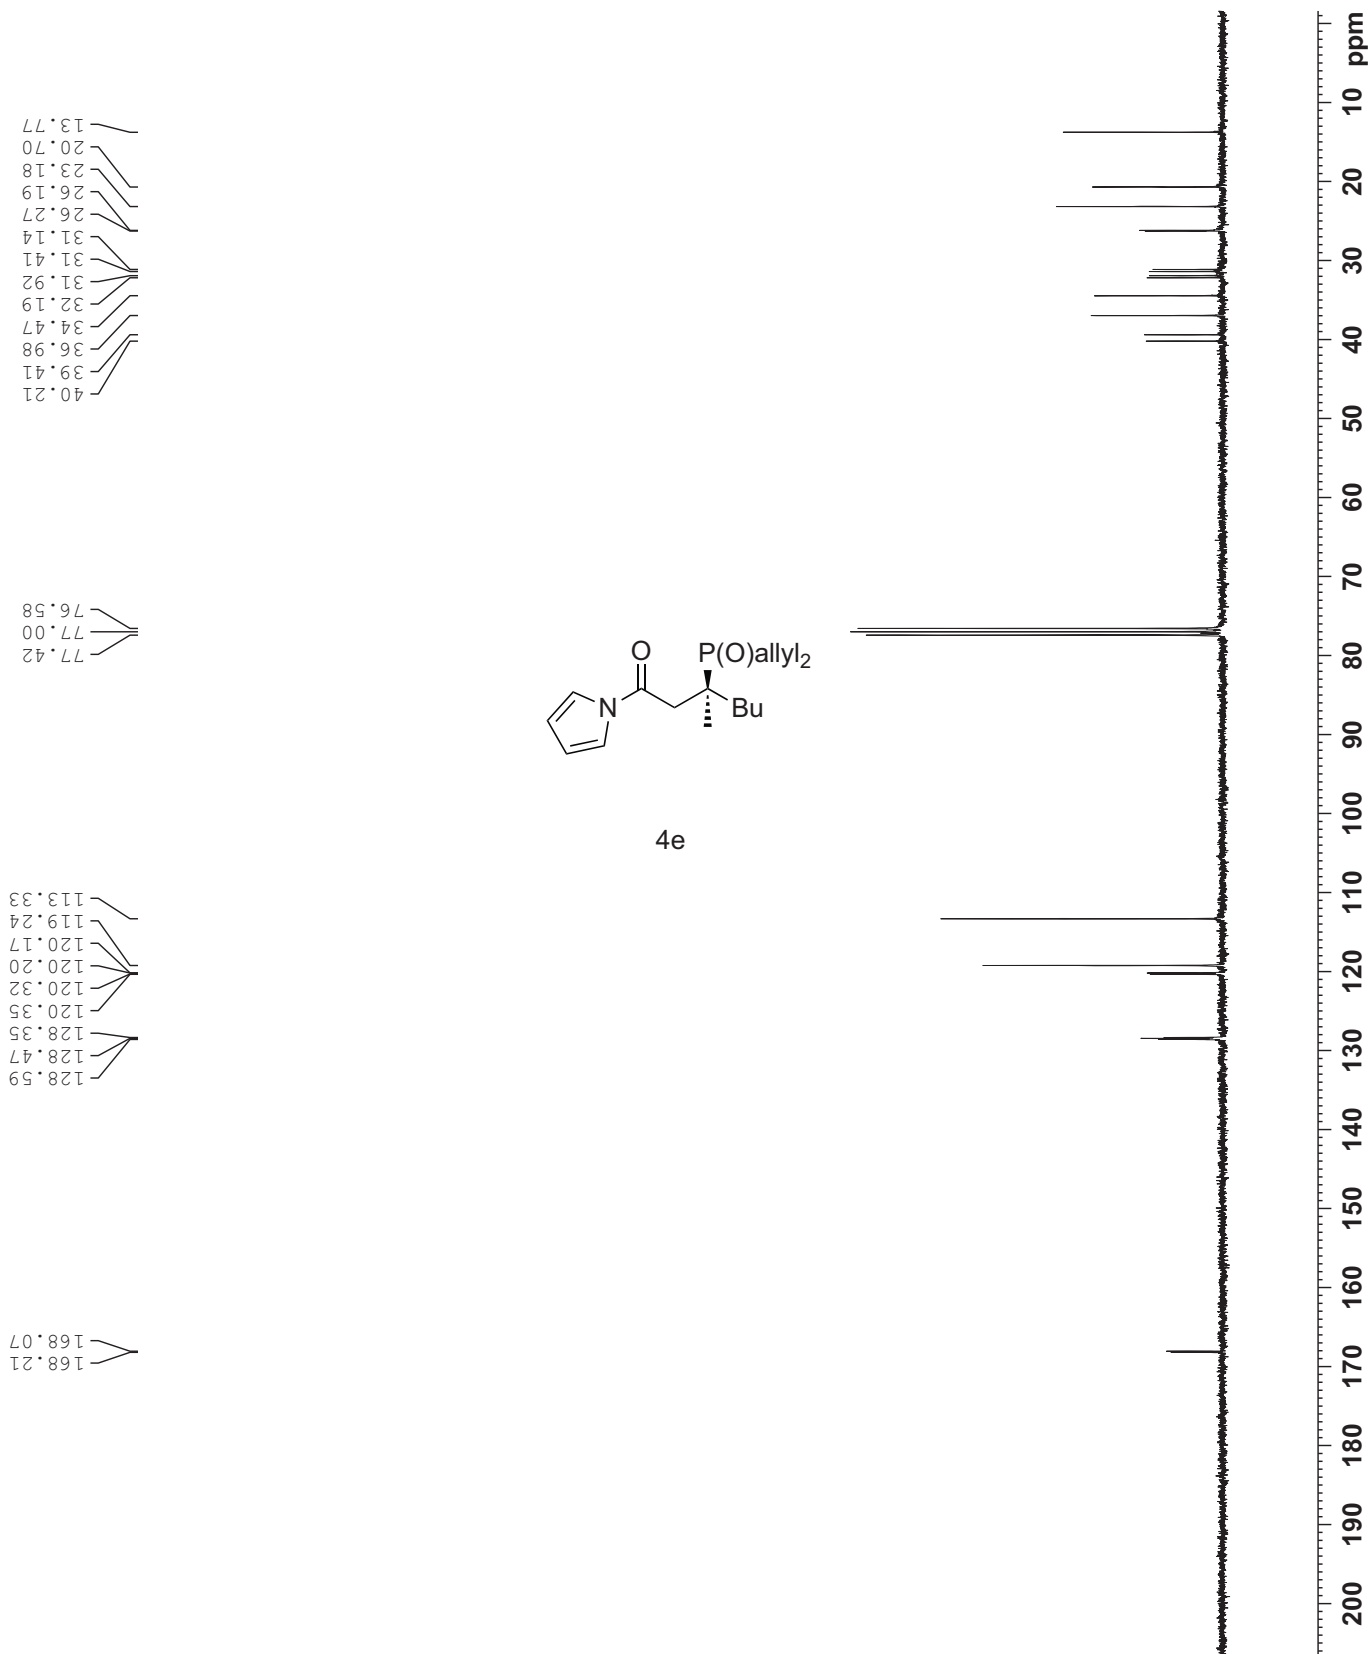

```
NAME 110326
EXPNO 2
PROCNO 1
Date_ 20110326
Time_ 10.24
INSTRUM spect
PROBHD 5 mm PABBO BB-
PULPROG zgpg30
TD 65536
SOLVENT CDCl3
NS 16
DS 4
SWH 49019.609 Hz
FIDRES 0.747980 Hz
AQ 0.6685172 sec
RG 203
DW 10.200 usec
DE 6.50 usec
TE 290.1 K
D1 2.0000000 sec
D11 0.0300000 sec
TDO 1

===== CHANNEL f1 =====
NUC1 31P
P1 9.10 usec
PL1 0.00 dB
PL1W 36.92473221 W
SFO1 121.4887762 MHz

===== CHANNEL f2 =====
CPDPRG2 waltz16
NUC2 1H
PCPD2 80.00 usec
PL2 1.00 dB
PL12 17.00 dB
PL13 17.00 dB
PL12W 9.17820644 W
PL13W 0.23054613 W
SFO2 300.1312005 MHz
SI 32768
SF 121.4948510 MHz
WDW EM
SSB 0
LB 1.00 Hz
GB 0
PC 1.40
```

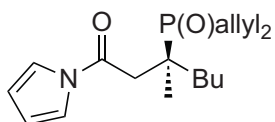

4e

52.06

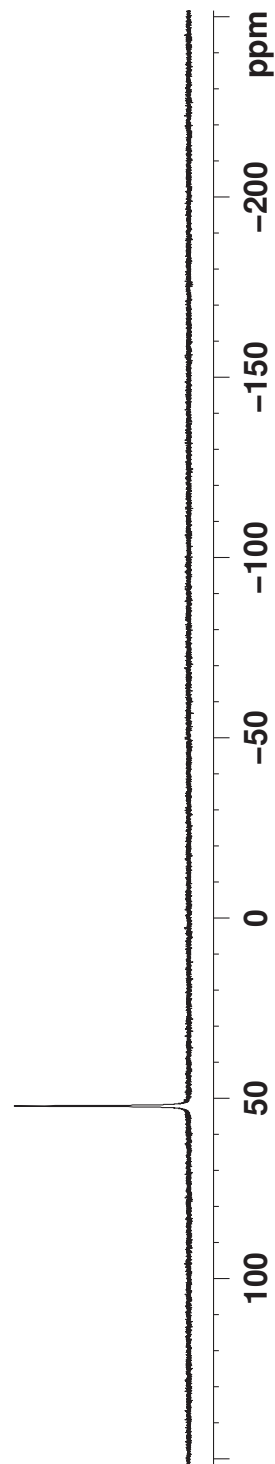

Supplement: c1cc16079f.pdf [file c1cc16079f.pdf]
